# Supplementary material for: Plant biostimulants as natural alternatives to synthetic auxins in strawberry production: physiological and metabolic insights
Source: Front Plant Sci. 2024 Jan 9;14:1337926. doi: 10.3389/fpls.2023.1337926 (PMC10803581; doi:10.3389/fpls.2023.1337926)
Supplement: Supplementary file 1 [file Table_1.xlsx]

## Sheet: FRUITS-BF vs. FRUITS-CONTROL
Alignment ID	Metabolite name	Annotation source	Library ID	Adduct type	INCHIKEY	pvalue	fc	fc2	S/N average	Big Fruit A1 MS1-1	Big Fruit A1 MS1-2	Big Fruit A2 MS1-1	Big Fruit A2 MS1-2	Big Fruit A3 MS1-1	Big Fruit A3 MS1-2	Big Fruit A4 MS1-1	Big Fruit A4 MS1-2	Big Fruit A5 MS1-1	Big Fruit A5 MS1-2	Big Fruit B1 MS1-1	Big Fruit B1 MS1-2	Big Fruit B2 MS1-1	Big Fruit B2 MS1-2	Big Fruit B3 MS1-1	Big Fruit B3 MS1-2	Big Fruit B4 MS1-1	Big Fruit B4 MS1-2	Big Fruit B5 MS1-1	Big Fruit B5 MS1-2
1530	trans-Cinnamaldehyde	MS/MS | lib_lcmsms_pos | FooDB:Strawberry	NIST_1197815	[M+H]+	KJPRLNWUNMBNBZ-QPJJXVBHSA-N	0.000121848	1.29536	0.373357	182.58	22386.1	21123.7	21358.6	21212.7	25020.7	21939.5	21287.3	20465.9	17875.4	18150	27624.5	28964.7	22798.1	24592.6	29174.9	30085.4	30483.3	31714.5	23740.2	23910.2
536	1-(2-Hydroxy-4-methoxyphenyl)-3-phenyl-1-propanone	MS/MS | lib_lcmsms_pos | FooDB:Plant	NIST_3188172	[M+H-C8H8O3]+	FQCZZYGBJVMLOG-UHFFFAOYSA-N	0.000701818	1.18084	0.239815	140.78	6049.51	5658.31	5941.78	5652.71	6238.73	5557.85	7084.48	7524.54	6793.82	7132.17	7640.11	8152.96	6993.51	6953.02	7983.08	8007.08	7541.13	7926.01	6903.13	7041.52
3538	2,10-Bisaboladiene-1,4-diol	MS/MS | lib_lcmsms_pos | FooDB:Plant	NIST_3278678	[M+H-H2O]+	FPSDOHYYKFXKFR-MYPMTAMASA-N	0.000779733	1.20864	0.273384	675.23	49271.2	47383.3	48203.6	45657.4	49358.7	47830.8	61041.7	61275.8	59631.5	63256.8	63527.2	65787.8	57549.5	59637.3	69478.4	73644.2	65318.3	65812.7	60425.7	62915.8
633	cis-Jasmone	MS/MS | lib_lcmsms_pos | FooDB:Plant	NIST_1461064	[M+H-C3H6O]+	XMLSXPIVAXONDL-PLNGDYQASA-N	0.000794507	1.18713	0.247472	12.49	4396.35	4528.04	4686.34	4240.72	4809.71	4169.92	5378.82	5473.61	5590.39	5686.74	5492.97	5996.1	5579.23	5297.1	6161.3	6496.02	5879.27	6139.65	5484.52	5596.25
8820	Astilbin	MS/MS | lib_lcmsms_pos | FooDB:Plant	NIST_3316487	[M+Na]+	ZROGCCBNZBKLEL-MPRHSVQHSA-N	0.000825637	1.22003	0.286911	479.18	35574	33756.9	34480.6	33924.3	47883.3	44288.4	36453.4	34886.9	31804.9	32380.5	41503.4	42864.7	41914.4	43095.3	42621.4	44868.9	46132.2	50010.9	45670.7	47155.7
7078	Sucrose	MS/MS | lib_lcmsms_pos | FooDB:Strawberry	NIST_1069679	[M+Na]+	CZMRCDWAGMRECN-UGDNZRGBSA-N	0.00216663	0.880575	-0.183481	3986.44	363065	349233	368551	353916	313115	288022	336867	323120	342446	341680	339636	345764	279259	280808	293933	291712	273642	269521	299617	302466
6106	D-(+)-Cellobiose	MS/MS | lib_lcmsms_pos | FooDB:Strawberry	NIST_1541848	[M+H-H2O]+	GUBGYTABKSRVRQ-QRZGKKJRSA-N	0.00562756	0.851939	-0.231178	207.69	15774.4	15985.4	15062.6	15156.3	12134.5	10790.9	13653.7	13975.8	13838.6	13762.9	14080.5	13626.5	9834.72	10367.5	11337	11575.4	12276.3	11847.4	12451.3	11990
7323	RIBOFLAVIN	MS/MS | lib_lcmsms_pos | FooDB:Strawberry	MoNA024059	[M+H]+	AUNGANRZJHBGPY-SCRDCRAPSA-N	0.00773749	0.251889	-1.98914	262.11	1021.13	1682.61	1018.04	1129	510.06	512.79	1514.34	1723.25	51.006	51.006	51.006	51.006	51.006	529.29	892.35	542.03	51.006	51.006	51.006	51.006
8544	Eriodictyol-7-O-glucoside	MS/MS | lib_lcmsms_pos | FooDB:Plant	RIKENPlaSMA002528	[M+H]+	RAFHNDRXYHOLSH-RGHIGTIISA-N	0.00794146	1.31299	0.392857	376.14	14277	14523.9	12945.4	14001.8	27177.2	25928.8	19541.5	20197.9	16081.3	16375.3	19495.8	21495.7	20269.3	21524.6	23871.8	25588	25738	28224.7	24835.5	26673.6
1129	(-)-Catechin	MS/MS | lib_lcmsms_pos | FooDB:Strawberry	NIST_1310316	[M+H-C8H8O4]+	PFTAWBLQPZVEMU-HIFRSBDPSA-N	0.00801155	1.232	0.301005	158.68	5830.68	5341.13	5203.38	5090.35	8142.08	7671.9	5861.94	5412.6	8029.87	8366.62	7127.81	7592.41	7960.24	8176.93	7207.97	7444	9006.07	8878.38	8152.68	8472.72
5108	(-)-Gallocatechin 3-gallate	MS/MS | lib_lcmsms_pos | FooDB:Plant	NIST_1450243	[M+H-C7H6O5]+	WMBWREPUVVBILR-NQIIRXRSSA-N	0.0092295	1.30758	0.386896	1743.02	56198.3	53837.6	51336.9	54777.6	104291	102942	76751.2	76104.1	61182.4	61916.6	76232.3	80345.2	80999.6	84335.3	89245.9	98281.3	101381	106876	93447.1	103294
8255	Pelargonidin-3-O-glucoside	MS/MS | lib_lcmsms_pos | FooDB:Strawberry	RIKENPlaSMA002675	[M]+	ABVCUBUIXWJYSE-GQUPQBGVSA-O	0.00934966	1.1618	0.216366	10657	3.29599e+06	3.17712e+06	3.22238e+06	3254283	4682382	4.45349e+06	3958791	3.93085e+06	3.43615e+06	3387677	3.77051e+06	3827879	4.10916e+06	4.13066e+06	4277201	4.5012e+06	4.61121e+06	4641567	4.42272e+06	4461240
4642	Rhoifolin	MS/MS | lib_lcmsms_pos | FooDB:Plant	NIST_1675954	[M+H-C12H20O9]+	RPMNUQRUHXIGHK-PYXJVEIZSA-N	0.0113064	1.17599	0.233875	6522.88	1.03791e+06	987209	1006605	1.02442e+06	1.53028e+06	1.44347e+06	1.26577e+06	1262006	1085330	1.06368e+06	1.18998e+06	1.2217e+06	1.30996e+06	1324278	1.37632e+06	1.46185e+06	1.49953e+06	1.51425e+06	1.42262e+06	1446441
4728	(+)-Afzelechin	MS/MS | lib_lcmsms_pos | FooDB:Strawberry	NIST_3278814	[M+H]+	RSYUFYQTACJFML-DZGCQCFKSA-N	0.0120469	1.33332	0.415026	101.99	3421.29	3663.12	3630.15	3586.58	6096.68	5626.79	4709.27	5139.46	3206.86	3117.32	4178.59	4561.73	4331.16	4326.93	6593.24	7443.27	5973.06	6136.4	6322.09	6396.43
8284	5-(methylsulfanyl)pentyl-glucosinolate	ChemDistiller | PlantCyc	PlantCyc::CPDQT-286	[M+H]+	MEFPHTVXBPLRLX-KHXSHCKASA-M	0.0129321	1.18678	0.247058	327.14	16385.5	16274.2	16197	15838.7	19364.7	18973.7	16181.8	16976.1	20161.5	19759.5	17123.7	17676.3	18212.5	19262.4	24740.9	26452.5	19602.4	19750.9	23208.5	22977.6
8819	Astilbin	MS/MS | lib_lcmsms_pos | FooDB:Plant	NIST_3316486	[M+Na]+	ZROGCCBNZBKLEL-MPRHSVQHSA-N	0.0133033	1.04551	0.0642117	261.63	14535.1	14205.4	14905.7	14587.8	15261.6	14150.1	14598.9	14090.8	13661.5	13621.5	14996.6	15171.8	15720.3	15493.6	14304.5	15677.1	14691.7	14112.4	14819.4	15167.4
3528	Cys-Val	MS/MS | lib_lcmsms_pos | plant	NIST_1631073	[M+H]+	OELDIVRKHTYFNG-NTSWFWBYSA-N	0.0133578	1.77137	0.824866	97.65	503.72	539.34	29.362	958.77	4020.45	4074.19	3259.45	3283.67	1972.79	1096.33	2642.82	2958.52	3214.03	3647.45	3265.2	3497.31	4043.27	4068.43	3728.31	3898.1
7814	glucoiberverin	ChemDistiller | PlantCyc	PlantCyc::3-METHYLTHIOPROPYL-GLUCOSINOLATE	[M+H]+	CDXQFXHOBINAQR-KPKJPENVSA-M	0.0149232	0.741644	-0.431201	834.36	62374	39075.3	60563.7	30234.9	41692.3	36614.6	58891.5	38567.7	44250	46865	32438.9	28506.7	44741.8	46490.6	38713.7	17573.8	30874.4	34582	34250.1	32338.2
3868	<i>N</i>-Formyl-L-kynurenine	ChemDistiller | PlantCyc	PlantCyc::N-FORMYLKYNURENINE	[M+H]+	BYHJHXPTQMMKCA-QMMMGPOBSA-N	0.0179206	1.34095	0.42326	65.47	1640.6	1574.63	1750.69	1003.11	2890.75	2773.84	3403.06	3360.94	2460.52	2190.48	2194.74	2709.56	2912.44	3108.4	3632.9	3761.69	2973.46	3435.68	3054.14	3124.13
8543	Eriodictyol-7-O-glucoside	MS/MS | lib_lcmsms_pos | FooDB:Plant	NIST_1154515	[M+H]+	RAFHNDRXYHOLSH-SFTVRKLSSA-N	0.0183346	1.16277	0.21757	56.1	2472.12	2531.42	1627.22	2168	3073.82	2829.44	2533.99	2746.53	2391.75	2000.94	2546.43	2674.18	2685.33	2865.47	2991.34	3119.78	2883.52	3074.78	2633.44	2868.59
1499	trans-Cinnamic acid	MS/MS | lib_lcmsms_pos | FooDB:Strawberry	NIST_1356166	[M+H-H2O]+	WBYWAXJHAXSJNI-VOTSOKGWSA-N	0.0193532	0.696652	-0.521491	76.19	79677.7	76483.5	80095.4	75239.5	42167.3	39108.5	82020.3	80514.9	39217.1	38881.6	40283.3	43365	30980.6	33127.1	51606.5	51925.4	58720.5	59156.2	36159.8	35938.6
1937	trans-Cinnamic acid	MS/MS | lib_lcmsms_pos | FooDB:Strawberry	NIST_1055357	[M+H]+	WBYWAXJHAXSJNI-VOTSOKGWSA-N	0.0202941	0.696489	-0.521827	156.2	14573	14100.6	14441.4	14175.7	7626.69	7712.13	15510.9	15471.4	7094.73	7165.88	8004.82	8050.57	5781.97	5894.37	9789.84	9706.9	10620.2	11208.4	6408.77	6631.06
8587	Olean-12-en-28-oic acid, 2,3,23-trihydroxy-, (4.alpha.)-	MS/MS | lib_lcmsms_pos | FooDB:Plant	NIST_3318521	[M+H-2H2O]+	RWNHLTKFBKYDOJ-UHFFFAOYSA-N	0.0208199	1.9912	0.993636	209.42	142.838	142.838	142.838	142.838	4614.43	4802.39	3869.53	3762.09	1428.38	1466.43	4180.08	4439.24	2965.87	3000.62	5372.88	5897.57	1464.29	2413.04	5276.88	5838.15
3123	Bisabolol oxide A	MS/MS | lib_lcmsms_pos | FooDB:Plant	NIST_1454519	[M+H-2H2O]+	WJHRAVIQWFQMKF-IPYPFGDCSA-N	0.0215572	1.22034	0.287281	151.76	2341.44	2291.48	2263.56	2365.94	2723.85	2462.23	3838.63	3969.57	3194.84	3241.44	2923.43	3130.71	3023.24	3365.57	4009.18	4317.7	3360.59	3604.28	3620.06	3660.37
11097	1-Palmitoyl-2-linoleoyl-sn-glycero-3-phosphocholine	MS/MS | lib_lcmsms_pos | FooDB:Strawberry	NIST_1150354	[M+H]+	JLPULHDHAOZNQI-ZTIMHPMXSA-N	0.0258078	0.0292235	-5.09673	91.17	8333.48	106.603	8150.73	106.603	10492.2	106.603	6167.27	106.603	2801.8	106.603	106.603	106.603	106.603	106.603	106.603	106.603	106.603	106.603	106.603	106.603
398	Dimethyl malonate	MS/MS | lib_lcmsms_pos | FooDB:Plant	NIST_1295767	[M+H-CH4O]+	BEPAFCGSDWSTEL-UHFFFAOYSA-N	0.0268908	1.15406	0.206713	11.01	5307.13	4782.24	4465.18	4620.01	5472.6	5343.56	4905.28	5283.82	5632	6068.16	5237.69	5056.21	5434.04	5481.38	7142.81	7611.13	5449.75	5423.96	6308.36	6727.05
8839	Folinic acid	MS/MS | lib_lcmsms_pos | FooDB:Strawberry	FiehnHILIC001946	[M+H]+	VVIAGPKUTFNRDU-ABLWVSNPSA-N	0.0357302	1.3439	0.42643	134.71	1473.02	1964.5	1233.62	1584.84	3562.9	3565.47	2421.34	2728.23	1730.98	2165.61	1931.11	2185.71	2278.52	2708.73	3428.55	3880.21	3280.47	3579.77	3330.5	3540.87
6339	9-hydroxy-1,4a-dimethyl-7-propan-2-yl-2,3,4,9,10,10a-hexahydrophenanthrene-1-carboxylic acid	MS/MS | lib_lcmsms_pos | plant	VF-NPL-QEHF007945	[M+NH4]+	GPFVBJYXFRIOFB-UHFFFAOYSA-N	0.0374981	5.03172	2.33105	30.54	270.42	270.42	270.42	270.42	270.42	270.42	270.42	270.42	270.42	270.42	270.42	270.42	270.42	270.42	3220.4	3158.74	2704.2	2900.92	270.42	270.42
6259	1,4a-dimethyl-9-oxo-7-propan-2-yl-3,4,10,10a-tetrahydro-2H-phenanthrene-1-carboxylic acid	MS/MS | lib_lcmsms_pos | plant	VF-NPL-QEHF007960	[M+NH4]+	MSWJSDLNPCSSNW-UHFFFAOYSA-N	0.0379113	10.1701	3.34626	74.77	98.028	98.028	98.028	98.028	98.028	98.028	98.028	98.028	98.028	98.028	98.028	98.028	98.028	98.028	2178.31	2166.54	2339.43	2697.07	98.028	98.028
5782	Picrotin	MS/MS | lib_lcmsms_pos | plant	NIST_1126403	[M+H]+	RYEFFICCPKWYML-YUGQFRRVSA-N	0.0391401	0.588267	-0.765456	54.68	3877.84	4020.31	3855.64	3974.41	1038.16	1362.05	4122.4	4078.75	1277.36	1680.68	1942.47	1690.07	53.371	533.71	2506.64	2680.34	2824.08	2765.81	875.2	1357.25
6425	Eicosanoids_15-oxoETE_C20H30O3	MS/MS | lib_lcmsms_pos | plant	CCMSLIB00001058244	[M+NH4]+	YGJTUEISKATQSM-USWFWKISSA-N	0.0392673	47.0575	5.55635	75.69	51.777	51.777	51.777	51.777	51.777	51.777	51.777	51.777	51.777	51.777	51.777	51.777	51.777	51.777	5064.62	5285.07	6874.7	6829.91	51.777	51.777
9152	Isorhamnetin 3-O-glucoside	MS/MS | lib_lcmsms_pos | FooDB:Strawberry	NIST_1118616	[M+Na]+	CQLRUIIRRZYHHS-LFXZADKFSA-N	0.0409489	1.45499	0.541008	485.82	21375.4	21436	20385.7	20323.2	42313.6	42459	35225.4	34878.3	14863	15161.9	26861.8	28943.7	25635.5	27202	30115.5	32480.2	52332.3	54644.8	54944	57390.4
4684	(-)-Catechin	MS/MS | lib_lcmsms_pos | FooDB:Strawberry	NIST_1310293	[M+H-H2O]+	PFTAWBLQPZVEMU-HIFRSBDPSA-N	0.0418223	1.26214	0.335871	260.27	14216.1	14180	2752.3	14670.9	22128.5	20821.3	18591.5	17873.1	15064.1	15321.2	16879.5	17433	18230	19003.5	19395	20966	20708.7	21980.8	20087	21729.2
8848	6''-O-Acetylgenistin	MS/MS | lib_lcmsms_pos | FooDB:Plant	NIST_1118639	[M+H]+	DXWGBJJLEDQBKS-LDBVRRDLSA-N	0.0471429	1.49849	0.583506	2175.81	59338.8	55663.3	56616.6	55744.9	208774	194334	148056	147879	182265	190334	114453	119586	123408	129206	267256	282987	186582	194510	261304	267250
9419	Gentianose	MS/MS | lib_lcmsms_pos | FooDB:Strawberry	NIST_1537214	[M+Na]+	MUPFEKGTMRGPLJ-WSCXOGSTSA-N	0.049927	0.784224	-0.350663	81.37	8103.66	8175.73	8314.53	7769.3	4437.23	4223.76	7727.18	7892.28	4678.08	4985.34	5411.12	5828.18	3762.17	3835.02	4793.13	5093.17	6908.23	7159.3	4848.25	4361.03

## Sheet: FRUITS-SA vs. FRUITS-CONTROL
Alignment ID	Metabolite name	Annotation source	Library ID	Adduct type	INCHIKEY	pvalue	fc	fc2	S/N average	Big Fruit A1 MS1-1	Big Fruit A1 MS1-2	Big Fruit A2 MS1-1	Big Fruit A2 MS1-2	Big Fruit A3 MS1-1	Big Fruit A3 MS1-2	Big Fruit A4 MS1-1	Big Fruit A4 MS1-2	Big Fruit A5 MS1-1	Big Fruit A5 MS1-2	Big Fruit C1 MS1-1	Big Fruit C1 MS1-2	Big Fruit C2 MS1-1	Big Fruit C2 MS1-2	Big Fruit C3 MS1-1	Big Fruit C3 MS1-2	Big Fruit C4 MS1-1	Big Fruit C4 MS1-2	Big Fruit C5 MS1-1	Big Fruit C5 MS1-2
398	Dimethyl malonate	MS/MS | lib_lcmsms_pos | FooDB:Plant	NIST_1295767	[M+H-CH4O]+	BEPAFCGSDWSTEL-UHFFFAOYSA-N	2.98778e-09	1.51801	0.602182	11.01	5307.13	4782.24	4465.18	4620.01	5472.6	5343.56	4905.28	5283.82	5632	6068.16	7515.22	8204.58	8699.48	8862.85	7317.07	7362.43	7805.05	8287.75	7351.89	7348.04
8284	5-(methylsulfanyl)pentyl-glucosinolate	ChemDistiller | PlantCyc	PlantCyc::CPDQT-286	[M+H]+	MEFPHTVXBPLRLX-KHXSHCKASA-M	4.59703e-08	1.55536	0.637244	327.14	16385.5	16274.2	16197	15838.7	19364.7	18973.7	16181.8	16976.1	20161.5	19759.5	26875.7	28723.8	31025.2	32324.6	25315	25176.5	27232.7	27358.9	24058.3	25826.8
1150	Picolinic acid	MS/MS | lib_lcmsms_pos | plant	NIST_1051073	[M+H]+	SIOXPEMLGUPBBT-UHFFFAOYSA-N	4.63217e-06	1.88559	0.915015	1969.88	6596.43	6405.18	6870.68	6688.64	13882.5	12018.1	8403.45	7425.17	12659.2	13207.6	18897.9	21469.7	19345.7	20791.3	17479.2	17992.1	13877	13823.7	16556.7	17307.8
4312	&beta;-D-ribosylnicotinate	ChemDistiller | PlantCyc	PlantCyc::CPD-8259	[M+H]+	PUEDDPCUCPRQNY-ZYUZMQFOSA-N	6.16834e-06	1.92086	0.941749	722.78	2373.17	2265.01	2500.76	1919.33	5009.36	4442.68	2862.84	2770.73	4799.45	4725.18	6459.74	7617.14	7469.84	7383.19	6617.52	6453.56	5407.98	5053.83	5888.03	6321.5
6720	Enalaprilat	MS/MS | lib_lcmsms_pos | plant	CO000161	[M+H]+	LZFZMUMEGBBDTC-NWANDNLSSA-N	1.23583e-05	175.993	7.45938	51.12	53.106	53.106	53.106	53.106	53.106	53.106	53.106	53.106	53.106	53.106	5241.18	13483.3	14015.4	13404	7912.06	4440.62	10706.6	8323.9	7847.62	8088.31
7078	Sucrose	MS/MS | lib_lcmsms_pos | FooDB:Strawberry	NIST_1069679	[M+Na]+	CZMRCDWAGMRECN-UGDNZRGBSA-N	1.58106e-05	0.720395	-0.47314	3986.44	363065	349233	368551	353916	313115	288022	336867	323120	342446	341680	199816	214866	190620	192892	269353	268673	301268	287335	250387	259735
6106	D-(+)-Cellobiose	MS/MS | lib_lcmsms_pos | FooDB:Strawberry	NIST_1541848	[M+H-H2O]+	GUBGYTABKSRVRQ-QRZGKKJRSA-N	3.5958e-05	0.682077	-0.551993	207.69	15774.4	15985.4	15062.6	15156.3	12134.5	10790.9	13653.7	13975.8	13838.6	13762.9	7658.02	8477.22	6801.88	6581.22	10703.5	10961.2	11491.9	11768.3	10311.8	10828
9419	Gentianose	MS/MS | lib_lcmsms_pos | FooDB:Strawberry	NIST_1537214	[M+Na]+	MUPFEKGTMRGPLJ-WSCXOGSTSA-N	3.9673e-05	0.427868	-1.22476	81.37	8103.66	8175.73	8314.53	7769.3	4437.23	4223.76	7727.18	7892.28	4678.08	4985.34	3234.29	3332.26	1611.87	1949.02	2339.53	1688.23	4111.83	4030.96	2837.21	3235.49
6707	(E)-3-[4-[(2S,3R,4S,5S,6R)-3,4,5-trihydroxy-6-(hydroxymethyl)oxan-2-yl]oxyphenyl]prop-2-enoic acid	MS/MS | lib_lcmsms_pos | FooDB:Strawberry	VF-NPL-QEHF006262	[M+Na]+	LJFYQZQUAULRDF-FDGSXQGBSA-N	5.21937e-05	0.780706	-0.357148	2479.67	430852	424025	425281	437540	346497	339482	389707	382279	384165	386194	351469	371998	247580	251017	317151	316761	299099	294324	314061	317224
5673	L-Glutathione, reduced	MS/MS | lib_lcmsms_pos | FooDB:Strawberry	NIST_1632175	[M+H]+	RWSXRVCMGQZWBV-WDSKDSINSA-N	6.23138e-05	0.842675	-0.246952	19540.7	1.3079e+06	1.32071e+06	1338908	1308491	1.5622e+06	1.44203e+06	1.3674e+06	1.41116e+06	1.28637e+06	1.23897e+06	1.16607e+06	1.26403e+06	1212482	1.21429e+06	1.21813e+06	1.17707e+06	1.10191e+06	1.07234e+06	983497	1.03718e+06
9466	curcumin monoglucoside	ChemDistiller | PlantCyc	PlantCyc::CPD-6622	[M+H]+	UTULZZKBGPPSOF-JBNJIKQZSA-N	8.24959e-05	0.24813	-2.01083	130.66	4586	4628.29	4407.66	4736.12	6222.31	6641.33	10326.1	11494.7	9130.05	9876.05	50.748	50.748	4380.6	3971.48	967.82	507.48	1360.98	1634.36	2585.87	2367.31
8820	Astilbin	MS/MS | lib_lcmsms_pos | FooDB:Plant	NIST_3316487	[M+Na]+	ZROGCCBNZBKLEL-MPRHSVQHSA-N	0.000109839	1.32729	0.408482	479.18	35574	33756.9	34480.6	33924.3	47883.3	44288.4	36453.4	34886.9	31804.9	32380.5	47249.5	50418.9	57378.7	57927.9	47274.9	46387.3	47876.1	47441.9	40476.8	42603.2
2292	3-Hydroxycinnamic acid	MS/MS | lib_lcmsms_pos | FooDB:Strawberry	RIKENPlaSMA002029	[M+H]+	KKSDGJDHHZEWEP-SNAWJCMRSA-N	0.000147624	0.780864	-0.356857	145.7	70859.4	70564.9	68663.2	69704.3	62219.1	59518.8	72580.3	71991.2	61847.9	61697.9	63793.3	69403.5	47717.6	48705.8	46547.9	47708.4	51515.5	49588	47342.5	50580.8
6111	Quinoxalinedione + 2Methyl + C5H11O4	MS/MS | lib_lcmsms_pos | plant	PR310798	[M+H]+	SLOQSNHEHSCLGS-UHFFFAOYSA-N	0.0002427	2.26357	1.1786	142.31	52.285	587.22	522.85	52.285	1993.31	1924.5	1775.68	1790.76	998.11	938.29	2378.21	2652.84	2673.34	2748.41	1969.31	2089.68	2101.37	2147.32	2614.62	2698.67
8543	Eriodictyol-7-O-glucoside	MS/MS | lib_lcmsms_pos | FooDB:Plant	NIST_1154515	[M+H]+	RAFHNDRXYHOLSH-SFTVRKLSSA-N	0.000294795	1.3277	0.408925	56.1	2472.12	2531.42	1627.22	2168	3073.82	2829.44	2533.99	2746.53	2391.75	2000.94	3233.69	3126.55	3764.58	3862.49	3073.79	3079.42	3399.07	3337.79	2744.9	2740.62
6425	Eicosanoids_15-oxoETE_C20H30O3	MS/MS | lib_lcmsms_pos | plant	CCMSLIB00001058244	[M+NH4]+	YGJTUEISKATQSM-USWFWKISSA-N	0.000512022	107.751	6.75155	75.69	51.777	51.777	51.777	51.777	51.777	51.777	51.777	51.777	51.777	51.777	5235.18	5261.29	7799.46	7664.89	51.777	51.777	9573.92	9077.23	5757.21	5317.3
8598	Vitexin	MS/MS | lib_lcmsms_pos | FooDB:Plant	NIST_1155108	[M+Na]+	SGEWCQFRYRRZDC-VPRICQMDSA-N	0.000683893	1.11449	0.156381	102.22	5019.11	5142.92	5240.48	5226.03	4754.5	4854.9	4748.14	4815.97	5033.01	4923.63	5293.32	5615.23	5056.48	5012.58	5905.2	6182.82	5614.23	5467.73	5508.81	5799.06
6259	1,4a-dimethyl-9-oxo-7-propan-2-yl-3,4,10,10a-tetrahydro-2H-phenanthrene-1-carboxylic acid	MS/MS | lib_lcmsms_pos | plant	VF-NPL-QEHF007960	[M+NH4]+	MSWJSDLNPCSSNW-UHFFFAOYSA-N	0.00088456	36.9055	5.20576	74.77	98.028	98.028	98.028	98.028	98.028	98.028	98.028	98.028	98.028	98.028	2968.95	3028.46	4323.36	4017.09	98.028	98.028	7131.83	6472.73	3979.76	4059.51
9166	Albiflorin	MS/MS | lib_lcmsms_pos | plant	NIST_3292825	[M+Na]+	QQUHMASGPODSIW-IHQQOQPXSA-N	0.00101315	0.253688	-1.97887	322.08	11080	11343.8	11001.7	10820.9	17303	16913.7	30068.1	30202.2	34673.9	34674.8	2976.58	3102.52	7410.62	7231.93	4565.03	4818.49	4999.67	5062.14	6260.77	6360.25
6339	9-hydroxy-1,4a-dimethyl-7-propan-2-yl-2,3,4,9,10,10a-hexahydrophenanthrene-1-carboxylic acid	MS/MS | lib_lcmsms_pos | plant	VF-NPL-QEHF007945	[M+NH4]+	GPFVBJYXFRIOFB-UHFFFAOYSA-N	0.00102807	13.1788	3.72015	30.54	270.42	270.42	270.42	270.42	270.42	270.42	270.42	270.42	270.42	270.42	2834.44	3089.83	3769.69	3463.21	270.42	270.42	6777.31	6588.47	4428.9	4145.44
1999	Xanthosine	MS/MS | lib_lcmsms_pos | FooDB:Strawberry	NIST_1359317	[M+H-C5H8O4]+	UBORTCNDUKBEOP-UUOKFMHZSA-N	0.00113884	0.362395	-1.46437	318.28	1061.55	1543.15	1325.15	622.56	2772.5	1664.74	2757.67	2782.07	3095.2	2712.7	539.3	1101.84	53.258	532.58	1001.69	1010.68	1502.68	1028.31	53.258	546.53
8819	Astilbin	MS/MS | lib_lcmsms_pos | FooDB:Plant	NIST_3316486	[M+Na]+	ZROGCCBNZBKLEL-MPRHSVQHSA-N	0.00132464	1.08861	0.122485	261.63	14535.1	14205.4	14905.7	14587.8	15261.6	14150.1	14598.9	14090.8	13661.5	13621.5	15055.7	15677	14243.4	14530.6	16650	16679.1	16731.4	15436.4	15545.1	15795.1
4346	5-methylcytidine	ChemDistiller | PlantCyc	PlantCyc::CPD0-2495	[M+H]+	ZAYHVCMSTBRABG-JXOAFFINSA-N	0.00133669	1.51009	0.594637	792.6	27844.7	29020.4	28085.9	29008.3	50793.8	48084.3	33541.9	30683.9	49881.7	51488.2	42847.7	46286.8	61649.8	61700.3	43927.5	45072.7	61234.9	60286.1	73056.9	75406.6
8255	Pelargonidin-3-O-glucoside	MS/MS | lib_lcmsms_pos | FooDB:Strawberry	RIKENPlaSMA002675	[M]+	ABVCUBUIXWJYSE-GQUPQBGVSA-O	0.00184641	1.29263	0.370306	10657	3.29599e+06	3.17712e+06	3.22238e+06	3254283	4682382	4.45349e+06	3958791	3.93085e+06	3.43615e+06	3387677	4628646	4856032	6.0263e+06	6.02423e+06	4.2671e+06	4.22014e+06	4809073	4746710	3950572	4.03873e+06
4754	(10E,15Z)-9,12,13-Trihydroxyoctadeca-10,15-dienoic acid	MS/MS | lib_lcmsms_pos | FooDB:Plant	NIST_1869606	[M+H-3H2O]+	MKYUCBXUUSZMQB-MKZMYESJSA-N	0.00184734	1.31552	0.395631	298.31	3897.88	4088.24	4085.35	3884.4	5725.91	5180.22	4721.78	4931.27	3941.37	4119.72	5446.68	5767.45	5542.77	5716.33	5376.17	5075.88	5244.03	5108.44	7368.69	7994.29
7814	glucoiberverin	ChemDistiller | PlantCyc	PlantCyc::3-METHYLTHIOPROPYL-GLUCOSINOLATE	[M+H]+	CDXQFXHOBINAQR-KPKJPENVSA-M	0.00207341	0.663874	-0.591018	834.36	62374	39075.3	60563.7	30234.9	41692.3	36614.6	58891.5	38567.7	44250	46865	33217.7	29420.1	29490.1	28953.7	16721.9	32984	34914.8	31446.4	23611.3	44044.1
4642	Rhoifolin	MS/MS | lib_lcmsms_pos | FooDB:Plant	NIST_1675954	[M+H-C12H20O9]+	RPMNUQRUHXIGHK-PYXJVEIZSA-N	0.00214176	1.35423	0.437468	6522.88	1.03791e+06	987209	1006605	1.02442e+06	1.53028e+06	1.44347e+06	1.26577e+06	1262006	1085330	1.06368e+06	1531757	1.60988e+06	2.09951e+06	2106114	1.3747e+06	1.37421e+06	1.61538e+06	1562725	1.27966e+06	1.29955e+06
1499	trans-Cinnamic acid	MS/MS | lib_lcmsms_pos | FooDB:Strawberry	NIST_1356166	[M+H-H2O]+	WBYWAXJHAXSJNI-VOTSOKGWSA-N	0.00232557	0.541615	-0.884661	76.19	79677.7	76483.5	80095.4	75239.5	42167.3	39108.5	82020.3	80514.9	39217.1	38881.6	37629.4	39895.3	60556.6	61863	19897.5	19739.5	26397.4	26091.8	25706.6	25284.6
4684	(-)-Catechin	MS/MS | lib_lcmsms_pos | FooDB:Strawberry	NIST_1310293	[M+H-H2O]+	PFTAWBLQPZVEMU-HIFRSBDPSA-N	0.00246577	1.50967	0.594232	260.27	14216.1	14180	2752.3	14670.9	22128.5	20821.3	18591.5	17873.1	15064.1	15321.2	23122.7	24035	31303.8	31909.1	20193.1	20245.7	24017.7	22830.7	18317.2	18957.9
1937	trans-Cinnamic acid	MS/MS | lib_lcmsms_pos | FooDB:Strawberry	NIST_1055357	[M+H]+	WBYWAXJHAXSJNI-VOTSOKGWSA-N	0.00258412	0.544951	-0.8758	156.2	14573	14100.6	14441.4	14175.7	7626.69	7712.13	15510.9	15471.4	7094.73	7165.88	7063.79	7330.1	11533.8	11434.8	3955.93	3559.03	4735.04	5167.23	4810.03	4645.1
5108	(-)-Gallocatechin 3-gallate	MS/MS | lib_lcmsms_pos | FooDB:Plant	NIST_1450243	[M+H-C7H6O5]+	WMBWREPUVVBILR-NQIIRXRSSA-N	0.0026015	1.58225	0.661978	1743.02	56198.3	53837.6	51336.9	54777.6	104291	102942	76751.2	76104.1	61182.4	61916.6	108703	115306	161866	163041	87648.1	86319.4	110365	108266	79139.4	85873.4
8544	Eriodictyol-7-O-glucoside	MS/MS | lib_lcmsms_pos | FooDB:Plant	RIKENPlaSMA002528	[M+H]+	RAFHNDRXYHOLSH-RGHIGTIISA-N	0.00269134	1.59691	0.675284	376.14	14277	14523.9	12945.4	14001.8	27177.2	25928.8	19541.5	20197.9	16081.3	16375.3	28704.5	30225.1	42902.1	42973.4	22820.2	22506	28135.2	28074.6	20434.5	22345.2
5168	(-)-Epicatechin	MS/MS | lib_lcmsms_pos | FooDB:Strawberry	FIO00070	[M+H]+	PFTAWBLQPZVEMU-UKRRQHHQSA-N	0.0032322	0.699385	-0.515841	4875.99	20278.4	19516.8	19858.3	20508.2	21026.3	19875.5	22950.4	23589.9	33685.6	33363.7	14069.8	15557.3	12912.9	12942.6	14628.4	14817.7	18077.3	18401	20742.2	21963.9
7082	Sucrose	MS/MS | lib_lcmsms_pos | FooDB:Strawberry	NIST_1069679	[M+Na]+	CZMRCDWAGMRECN-UGDNZRGBSA-N	0.00351362	0.785822	-0.347726	211.28	112479	119527	120361	112460	96864.6	81055.3	98981	89154.8	118924	108311	66928.1	75361.5	59040.7	61011.8	103859	100153	89710.4	92713.4	90639.5	92075.3
5782	Picrotin	MS/MS | lib_lcmsms_pos | plant	NIST_1126403	[M+H]+	RYEFFICCPKWYML-YUGQFRRVSA-N	0.00411137	0.320785	-1.64032	54.68	3877.84	4020.31	3855.64	3974.41	1038.16	1362.05	4122.4	4078.75	1277.36	1680.68	892.76	1706.27	3171.58	3304.2	53.371	53.371	53.371	53.371	53.371	53.371
8040	glucoiberin	ChemDistiller | PlantCyc	PlantCyc::3-METHYLSULFINYLPROPYL-GLUCOSINOLATE	[M+H]+	PHYYADMVYQURSX-WWFIZPDBSA-M	0.00433689	1.13351	0.180793	173.91	9908.41	10055.5	9912.99	9936.11	11949.5	11559.1	12046.1	12234.6	10025.4	10625.9	12338.5	13026.5	11373.6	10893.3	11133.7	11725.1	13342	13790.6	12236.6	12846.4
752	2'-Deoxycytidine	MS/MS | lib_lcmsms_pos | FooDB:Strawberry	NIST_1342350	[M+H-C5H8O3]+	CKTSBUTUHBMZGZ-BBVRLYRLSA-N	0.00438717	0.428038	-1.22419	8.87	1698.78	1590.53	1220.21	524.71	2014.97	1993.2	2676.13	2411.95	2110.32	1601.94	1375.11	18.626	1902.44	1655.97	18.626	529.89	18.626	18.626	583.36	1516.1
3528	Cys-Val	MS/MS | lib_lcmsms_pos | plant	NIST_1631073	[M+H]+	OELDIVRKHTYFNG-NTSWFWBYSA-N	0.00510604	2.52869	1.33839	97.65	503.72	539.34	29.362	958.77	4020.45	4074.19	3259.45	3283.67	1972.79	1096.33	6838.48	7131.2	8389.35	8595.3	2696.89	2740.06	4085.74	3946.31	2702.43	2785.79
6938	(-)-Riboflavin	MS/MS | lib_lcmsms_pos | FooDB:Strawberry	NIST_1335081	[M+H-H2O]+	AUNGANRZJHBGPY-SCRDCRAPSA-N	0.00577342	0.260284	-1.94184	82.36	5445.11	5345.52	5476.09	5248.97	2147.84	1646.45	4659.39	4853.17	529.54	944.88	524.56	51.638	4317.31	4244.19	51.638	51.638	51.638	51.638	51.638	51.638
4732	Trimethoprim	MS/MS | lib_lcmsms_pos | plant	NIST_1367556	[M+H-CH4]+	IEDVJHCEMCRBQM-UHFFFAOYSA-N	0.00647405	1.12326	0.167692	68.87	3583.41	3503.1	3423.51	3479.7	3510.75	3432.5	3602.54	3423.34	2673.85	2744.83	3806.43	3998.21	4146.6	4009.32	3506.92	3521.39	3703.2	3741.95	3380.1	3677.53
2732	Chelidonic acid	MS/MS | lib_lcmsms_pos | FooDB:Plant	NIST_1444307	[M+H]+	PBAYDYUZOSNJGU-UHFFFAOYSA-N	0.00824446	1.23005	0.298715	3100.67	3695.38	3845.85	3681.49	3718.24	4629.89	4450.9	5654.1	5862.69	4992.99	5209.21	5301.88	5583.18	6624.37	6595.97	4308.21	4839.43	6105.12	6120.79	5245.36	5539.01
3993	CYTIDINE	MS/MS | lib_lcmsms_pos | FooDB:Strawberry	VF-NPL-QTOF007247	[M+H]+	UHDGCWIWMRVCDJ-XVFCMESISA-N	0.00997453	0.84335	-0.245796	210.15	23884.7	25295	24527.5	23586.7	25238.5	23572.6	29406.4	30560.4	23651.7	24656.4	19998.7	21033.7	27162.7	27987.9	17182.5	18274.7	19990.4	20058.4	20442.7	22399.8
9028	Veronicoside	MS/MS | lib_lcmsms_pos | plant	NIST_1811937	[M+Na]+	GOHHRVCULPSXEU-RWORTQBESA-N	0.0113798	0.0387449	-4.68985	58.27	56.372	56.372	56.372	56.372	1509.43	950.03	2748.96	2639.66	3172.57	3303.38	56.372	56.372	56.372	56.372	56.372	56.372	56.372	56.372	56.372	56.372
8587	Olean-12-en-28-oic acid, 2,3,23-trihydroxy-, (4.alpha.)-	MS/MS | lib_lcmsms_pos | FooDB:Plant	NIST_3318521	[M+H-2H2O]+	RWNHLTKFBKYDOJ-UHFFFAOYSA-N	0.0120664	2.04966	1.03538	209.42	142.838	142.838	142.838	142.838	4614.43	4802.39	3869.53	3762.09	1428.38	1466.43	3208.86	3358.82	3142.86	2612.1	6173.53	5769.46	5357.09	5604.36	3496.31	3324.48
7764	Rhaponticin	MS/MS | lib_lcmsms_pos | FooDB:Plant	NIST_1291588	[403.1]+	GKAJCVFOJGXVIA-DXKBKAGUSA-N	0.0155177	1.97238	0.979936	98.76	3483.1	3628.74	3316.9	3548.59	6732.33	6644.98	4439.96	4651.04	2553.59	2878.4	8661.31	9460.94	15768.9	15446.4	5030.53	4730.13	7381.4	7278.09	4340.52	4500.28
7833	Euscaphic acid	MS/MS | lib_lcmsms_pos | FooDB:Plant	NIST_3095347	[M+H-CH6O4]+	OXVUXGFZHDKYLS-YFIQRXMRSA-N	0.016331	2.28954	1.19506	141.17	92.724	92.724	92.724	92.724	3223.52	3322.7	2525.59	2465.53	92.724	92.724	1836.9	1822.82	1718.5	1501.55	4471.95	4087.35	3891.44	3629.06	2493.89	2235.47
5913	Kelampayoside A	MS/MS | lib_lcmsms_pos | FooDB:Plant	NIST_3302231	[M+H-C6H10O5]+	CKGKQISENBKOCA-NHBPFIHPSA-N	0.0201888	0.356488	-1.48808	652.75	92304.4	88617.5	92109.3	92963.4	37050.6	35171	176339	176002	22918.2	23280.7	21691.2	22972.5	89299.6	87066.4	9900.6	9867.54	19448.1	18089.9	9928.44	10028.7
9867	Procyanidin B2	MS/MS | lib_lcmsms_pos | FooDB:Strawberry	NIST_1112121	[M+H]+	XFZJEEAOWLFHDH-NFJBMHMQSA-N	0.0215391	0.557992	-0.841683	290.53	15635.2	15442.4	14905.6	15755.3	13175.1	13013.5	18162	19382.9	10116.2	11066.1	51.227	12050.7	15932.6	16533.5	51.227	51.227	13183.7	12887.2	51.227	11039.4
5458	Delphinidin	MS/MS | lib_lcmsms_pos | FooDB:Strawberry	RIKENPlaSMA003076	[M]+	JKHRCGUTYDNCLE-UHFFFAOYSA-O	0.0233732	1.4639	0.549821	2732.08	4347.98	4349.64	4099.9	4065.32	6412.53	6088.25	7958.42	8465.11	5746.39	6226.45	7216.93	7432.61	13495.1	14287.3	6076.53	6110.45	7211.66	7628.95	7464.49	7631.07
5979	Tyr-His	MS/MS | lib_lcmsms_pos | plant	NIST_1634694	[M+H]+	ZQOOYCZQENFIMC-STQMWFEESA-N	0.0246002	2.23622	1.16106	235.4	12650.5	11328	11404.3	11335.8	17667.2	16310.2	6739.92	6523.66	8103.78	7976.97	45062.4	47652	30490.9	29160.3	7617.28	7802.61	31658.8	31545.1	7402.87	7682.31
11097	1-Palmitoyl-2-linoleoyl-sn-glycero-3-phosphocholine	MS/MS | lib_lcmsms_pos | FooDB:Strawberry	NIST_1150354	[M+H]+	JLPULHDHAOZNQI-ZTIMHPMXSA-N	0.0258078	0.0292235	-5.09673	91.17	8333.48	106.603	8150.73	106.603	10492.2	106.603	6167.27	106.603	2801.8	106.603	106.603	106.603	106.603	106.603	106.603	106.603	106.603	106.603	106.603	106.603
1132	Nicotinamide	MS/MS | lib_lcmsms_pos | FooDB:Strawberry	FiehnHILIC000609	[M+H]+	DFPAKSUCGFBDDF-UHFFFAOYSA-N	0.0287864	1.20843	0.273135	504.43	35898.7	35622.2	35631.6	34116.2	45610.2	39525.2	44190.1	40530.6	42761.7	41594.8	40185.5	45242	56316.1	56697.1	52845	52838.8	33417	31367.9	52093.1	56909.4
7327	2-Linoleoylglycerol	MS/MS | lib_lcmsms_pos | FooDB:Strawberry	NIST_1112244	[M+Na]+	IEPGNWMPIFDNSD-HZJYTTRNSA-N	0.0312084	0.431202	-1.21356	285.11	33383.9	29815.3	31697	29229	12287.2	11787.6	44098.9	41670.1	5610.49	6233.26	5314.67	5467	34226.2	33353.5	4945.97	5008.69	4677.58	4657.53	4421.28	3922.54
1127	3,5-Dihydroxybenzenemethanol	MS/MS | lib_lcmsms_pos | plant	NIST_1332679	[M+H-H2O]+	NGYYFWGABVVEPL-UHFFFAOYSA-N	0.031788	1.42746	0.513453	520.7	29324.9	28278.6	31206.6	29502.6	31317.7	24561.8	35218.5	34232.3	22945.9	23734.2	46803.1	71076	56316.2	52944.2	24150	24392.9	39589.7	37322.3	30031.4	31799.5
536	1-(2-Hydroxy-4-methoxyphenyl)-3-phenyl-1-propanone	MS/MS | lib_lcmsms_pos | FooDB:Plant	NIST_3188172	[M+H-C8H8O3]+	FQCZZYGBJVMLOG-UHFFFAOYSA-N	0.0325801	0.865697	-0.208066	140.78	6049.51	5658.31	5941.78	5652.71	6238.73	5557.85	7084.48	7524.54	6793.82	7132.17	5166.3	5733.56	6930.32	7138.3	4638.93	4418.91	4780.91	5263.53	5215.07	5801.86
3123	Bisabolol oxide A	MS/MS | lib_lcmsms_pos | FooDB:Plant	NIST_1454519	[M+H-2H2O]+	WJHRAVIQWFQMKF-IPYPFGDCSA-N	0.0326813	1.52045	0.604502	151.76	2341.44	2291.48	2263.56	2365.94	2723.85	2462.23	3838.63	3969.57	3194.84	3241.44	3566.06	3792.09	7849.03	7650.25	3924.04	4148.39	3538.12	2963.14	2954.04	3241.2
5021	N-glucosylnicotinate	ChemDistiller | PlantCyc	PlantCyc::CPD-446	[M+H]+	CRXJVFIHZPTDKA-KAMPLNKDSA-N	0.0357387	0.346724	-1.52814	61.94	2938.83	2745.46	3042.63	2967.91	14.261	14.261	4467.39	4641.41	1787.26	1316.73	533.9	525.55	3634.53	3519.7	14.261	14.261	14.261	14.261	14.261	14.261
2459	DL-Indole-3-lactic acid	MS/MS | lib_lcmsms_pos | FooDB:Strawberry	NIST_1363196	[M+H-2H2O]+	XGILAAMKEQUXLS-UHFFFAOYSA-N	0.03843	1.56181	0.64322	55.35	11395.7	10873.1	11527.9	11044	22378.4	21816	20240.4	21046.9	15042.9	15986.8	38649.3	40748.4	36371.7	37292.2	16181.8	15534.6	18769.2	17994.5	14360.4	16099.4
8891	Miquelianin	MS/MS | lib_lcmsms_pos | plant	NIST_1807914	[M+H]+	DUBCCGAQYVUYEU-ZUGPOPFOSA-N	0.0414234	1.39511	0.480378	5144.33	5040.29	4946.61	4797.25	4556.11	7446.39	6866.08	8317.73	8348.09	7441.03	7609.98	8462.59	8454.45	14872.7	15388.9	6471.98	6208.95	7485.61	7666.8	7866.05	8319.67
8054	NCGC00180835-03!2-[5-[2-[2-[5-(2-hydroxybutyl)oxolan-2-yl]propanoyloxy]propyl]oxolan-2-yl]propanoic acid	MS/MS | lib_lcmsms_pos | plant	CCMSLIB00000846081	[M+Na]+	JZCRGJSEBZCNAR-UHFFFAOYSA-N	0.0419761	1.61556	0.692032	85.37	4394.07	4599.54	4415.92	4159.53	798.98	53.875	8116.29	7943.52	2719.18	3172.39	6480.25	6662.31	10609.9	10316.7	6918.24	7224.87	3623.85	3413.75	4975.1	5000.4
4868	Phomopsolide B	MS/MS | lib_lcmsms_pos | plant	NIST_3282752	[M+H-H2O]+	JTHHOHSDOJJNFN-ZXSHYABSSA-N	0.0422906	11.5463	3.52936	147.56	51.05	51.05	51.05	51.05	51.05	51.05	51.05	51.05	51.05	51.05	1380.93	1469.02	51.05	51.05	1763.61	974.55	51.05	51.05	51.05	51.05

## Sheet: FRUITS-PH vs. FRUITS-CONTROL
Alignment ID	Metabolite name	Annotation source	Library ID	Adduct type	INCHIKEY	pvalue	fc	fc2	S/N average	Big Fruit A1 MS1-1	Big Fruit A1 MS1-2	Big Fruit A2 MS1-1	Big Fruit A2 MS1-2	Big Fruit A3 MS1-1	Big Fruit A3 MS1-2	Big Fruit A4 MS1-1	Big Fruit A4 MS1-2	Big Fruit A5 MS1-1	Big Fruit A5 MS1-2	Big Fruit D1 MS1-1	Big Fruit D1 MS1-2	Big Fruit D2 MS1-1	Big Fruit D2 MS1-2	Big Fruit D3 MS1-1	Big Fruit D3 MS1-2	Big Fruit D4 MS1-1	Big Fruit D4 MS1-2	Big Fruit D5 MS1-1	Big Fruit D5 MS1-2
398	Dimethyl malonate	MS/MS | lib_lcmsms_pos | FooDB:Plant	NIST_1295767	[M+H-CH4O]+	BEPAFCGSDWSTEL-UHFFFAOYSA-N	2.26926e-05	1.63032	0.705151	11.01	5307.13	4782.24	4465.18	4620.01	5472.6	5343.56	4905.28	5283.82	5632	6068.16	6835.1	7111.74	6583.34	7219.54	8697.03	9174.05	9195.15	9206.34	10360.7	10197.8
8284	5-(methylsulfanyl)pentyl-glucosinolate	ChemDistiller | PlantCyc	PlantCyc::CPDQT-286	[M+H]+	MEFPHTVXBPLRLX-KHXSHCKASA-M	3.22456e-05	1.72807	0.789158	327.14	16385.5	16274.2	16197	15838.7	19364.7	18973.7	16181.8	16976.1	20161.5	19759.5	23852.5	25712.7	22771.1	24905	30871.6	33173	33672.7	34430.7	37168.5	37776.3
7814	glucoiberverin	ChemDistiller | PlantCyc	PlantCyc::3-METHYLTHIOPROPYL-GLUCOSINOLATE	[M+H]+	CDXQFXHOBINAQR-KPKJPENVSA-M	0.000102628	0.532895	-0.908076	834.36	62374	39075.3	60563.7	30234.9	41692.3	36614.6	58891.5	38567.7	44250	46865	27178.4	16178.7	18363.9	31253.4	20499.9	31945.4	21625.4	26330.5	24199.2	27092.7
5372	5'-S-Methyl-5'-thioadenosine	MS/MS | lib_lcmsms_pos | FooDB:Strawberry	NIST_1348987	[M+H]+	WUUGFSXJNOTRMR-IOSLPCCCSA-N	0.000112123	1.67749	0.7463	602.39	16212.9	16251.9	16039.2	15357.5	13047	11920	17116	16882.1	9757.45	9993.72	15755	15515.5	24726.7	27735	24449.1	24641.9	23719.7	22657.8	30491.2	29480.4
2584	trans-Ferulic acid	MS/MS | lib_lcmsms_pos | FooDB:Strawberry	NIST_1356521	[M+H-H2O]+	KSEBMYQBYZTDHS-HWKANZROSA-N	0.00013189	1.39981	0.485227	117.51	4274.46	4104.72	4094.8	4293.65	5915.02	5857.01	6671.85	6138.77	4342.41	4677.34	6949.83	7221.48	5628.76	6052.8	7617.02	8169.77	8029.74	7749.7	6581.14	6508.05
1607	Isopentenyladenine	MS/MS | lib_lcmsms_pos | FooDB:Strawberry	NIST_1370113	[M+H-C5H8]+	HYVABZIGRDEKCD-UHFFFAOYSA-N	0.000311506	1.51916	0.603274	125.72	6574.18	6643.41	6301.12	6468.96	5093.46	5173.02	6937.4	7038.67	4156.89	4276.74	6289.52	6047.97	9345.03	10075.3	8823.37	9709.94	8385.46	8194.11	11033	11216.1
2849	4-Hydroxy-4-[(E)-3-hydroxybut-1-enyl]-3,5,5-trimethylcyclohex-2-en-1-one	MS/MS | lib_lcmsms_pos | FooDB:Plant	NIST_3165627	[M+H-2H2O]+	KPQMCAKZRXOZLB-AATRIKPKSA-N	0.000365861	1.37591	0.460386	262.99	2424.48	1909.18	2152.95	1969.99	3652.89	3377.58	3242.64	2953	2579.33	2758.64	3194.47	3354.29	3435.81	3452.95	4042.05	4010.86	3856.98	3728.26	4083.74	4018.62
1954	4-Hydroxymandelonitrile	MS/MS | lib_lcmsms_pos | FooDB:Strawberry	FiehnHILIC000102	[M+H]+	HOOOPXDSCKBLFG-UHFFFAOYSA-N	0.000469272	1.63905	0.712861	1012.79	18449.1	17072	17622.5	16558.6	16550.8	14037.5	18902.9	18371.1	17999	17772	25805.8	26392.7	20294	23659.6	22603.9	24648.9	30906.2	31054	39415.9	39324.7
9623	3-(4-((1,3-Dihydroxy-1-(4-hydroxy-3-methoxyphenyl)propan-2-yl)oxy)-3-methoxyphenyl)propyl 6-deoxy-.alpha.-L-mannopyranoside	MS/MS | lib_lcmsms_pos | plant	NIST_1945334	[M+Na]+	HZGGHVGIXDRDDH-GQEDLCMVSA-N	0.000473965	1.35305	0.436218	187.81	5918.1	6116.09	6137.17	6263.73	7317.38	7503.32	7518.37	7712.42	5446.22	6231.47	6927.89	6783.53	8030.67	8607.11	10545.8	10879.4	10100.8	9924.6	8875.86	8848.08
3528	Cys-Val	MS/MS | lib_lcmsms_pos | plant	NIST_1631073	[M+H]+	OELDIVRKHTYFNG-NTSWFWBYSA-N	0.000602083	2.26265	1.17801	97.65	503.72	539.34	29.362	958.77	4020.45	4074.19	3259.45	3283.67	1972.79	1096.33	3017.29	3377.48	4017.06	4045.64	4929.09	4800.31	4593.7	4185.59	5824.37	5869.76
8891	Miquelianin	MS/MS | lib_lcmsms_pos | plant	NIST_1807914	[M+H]+	DUBCCGAQYVUYEU-ZUGPOPFOSA-N	0.000737052	1.67355	0.742914	5144.33	5040.29	4946.61	4797.25	4556.11	7446.39	6866.08	8317.73	8348.09	7441.03	7609.98	6402.39	6406.14	12626.3	14344.5	12069.1	12756.2	9548.23	9348.47	13068.7	12829.4
2856	Kynurenic acid	MS/MS | lib_lcmsms_pos | plant	NIST_1054519	[M+H]+	HCZHHEIFKROPDY-UHFFFAOYSA-N	0.000957186	1.35551	0.438832	277.2	2207.48	2711.54	2495.84	2428.23	2352.83	2802.02	2121.29	2290.55	1813.53	1450.59	2230.89	2537.71	3233.75	3474.95	3460.82	3989.68	2922.83	3003.17	2951.97	2928.85
2789	1-fluoro-2,4-dinitrobenzene	ChemDistiller | PlantCyc	PlantCyc::CPD-8983	[M+H]+	LOTKRQAVGJMPNV-UHFFFAOYSA-N	0.00110586	2.92886	1.55034	29.01	1702.19	26.877	820.74	894.83	886.37	1433.06	531.99	268.77	26.877	26.877	1097.35	611.37	758.46	1860.62	2579.65	2592	2473.71	2016.24	2529.32	2866.21
2732	Chelidonic acid	MS/MS | lib_lcmsms_pos | FooDB:Plant	NIST_1444307	[M+H]+	PBAYDYUZOSNJGU-UHFFFAOYSA-N	0.00115519	1.27965	0.35575	3100.67	3695.38	3845.85	3681.49	3718.24	4629.89	4450.9	5654.1	5862.69	4992.99	5209.21	4997.34	4882.62	5814.4	6851.44	5539.45	5836.08	6454.79	6224.16	5905.09	6026.81
9600	(2R,3R,4S,5S,6R)-2-[3-[2-(4-hydroxy-3-methoxyphenyl)-3-(hydroxymethyl)-7-methoxy-2,3-dihydro-1-benzofuran-5-yl]propoxy]-6-(hydroxymethyl)oxane-3,4,5-triol	MS/MS | lib_lcmsms_pos | plant	VF-NPL-QTOF000668	[M+Na]+	DVWKMCPPEMUHBE-RAGYRXETSA-N	0.00115545	1.36021	0.443833	148.5	10624.8	10285.5	10462.1	10315.6	16866.7	16715	16817.7	17158.4	11865.9	11965.6	17217.8	17367.7	15468.4	15832.5	21114.2	21908.7	19738.1	19110.2	16651.2	16604.7
9743	3-(4-((1,3-Dihydroxy-1-(4-hydroxy-3-methoxyphenyl)propan-2-yl)oxy)-3-methoxyphenyl)propyl hexopyranoside	MS/MS | lib_lcmsms_pos | plant	NIST_3171281	[M+Na]+	NFUHNVZGHNEYRG-UHFFFAOYSA-N	0.00121381	1.2684	0.343012	144.11	10542.8	10295.3	10471.2	9986.77	10690.3	10504.3	9535.74	10308	6454.41	6755.7	11627.8	11445	10638.9	11211.2	14516.5	14594.5	12235.6	12410.5	11386.1	11122.9
3123	Bisabolol oxide A	MS/MS | lib_lcmsms_pos | FooDB:Plant	NIST_1454519	[M+H-2H2O]+	WJHRAVIQWFQMKF-IPYPFGDCSA-N	0.00131792	1.49387	0.579057	151.76	2341.44	2291.48	2263.56	2365.94	2723.85	2462.23	3838.63	3969.57	3194.84	3241.44	3001.3	3232.82	4330.08	4185.68	4301.87	4556.02	3845.06	3750.94	5674.86	5985.01
7078	Sucrose	MS/MS | lib_lcmsms_pos | FooDB:Strawberry	NIST_1069679	[M+Na]+	CZMRCDWAGMRECN-UGDNZRGBSA-N	0.00178256	0.866465	-0.206787	3986.44	363065	349233	368551	353916	313115	288022	336867	323120	342446	341680	307434	312675	309152	336823	268411	311811	293013	295508	255989	237849
5458	Delphinidin	MS/MS | lib_lcmsms_pos | FooDB:Strawberry	RIKENPlaSMA003076	[M]+	JKHRCGUTYDNCLE-UHFFFAOYSA-O	0.00181896	1.68332	0.751312	2732.08	4347.98	4349.64	4099.9	4065.32	6412.53	6088.25	7958.42	8465.11	5746.39	6226.45	5487.44	5293.66	12393	13437	10653.2	10612.4	8221.83	7892	11801.4	11436.8
8040	glucoiberin	ChemDistiller | PlantCyc	PlantCyc::3-METHYLSULFINYLPROPYL-GLUCOSINOLATE	[M+H]+	PHYYADMVYQURSX-WWFIZPDBSA-M	0.00185432	1.18315	0.242637	173.91	9908.41	10055.5	9912.99	9936.11	11949.5	11559.1	12046.1	12234.6	10025.4	10625.9	14910.8	14666.1	12500.7	13385	13318	13587.6	11427.7	11544.6	11443.5	11296.5
1855	5-Hydroxyindole-3-acetic acid	MS/MS | lib_lcmsms_pos | FooDB:Strawberry	NIST_1347758	[M+H-CH2O2]+	DUUGKQCEGZLZNO-UHFFFAOYSA-N	0.00348925	1.21597	0.282108	1384.3	130171	124759	129998	123182	177177	152708	187432	180688	142192	135446	168842	168342	164668	182723	203641	208625	167452	168254	180149	191504
7933	NCGC00384571-01!(E)-3-(4-hydroxyphenyl)-N-[3-[[(E)-3-(4-hydroxyphenyl)prop-2-enoyl]-[4-[[(E)-3-(4-hydroxyphenyl)prop-2-enoyl]-[3-[[(E)-3-(4-hydroxyphenyl)prop-2-enoyl]amino]propyl]amino]butyl]amino]propyl]prop-2-enamide [IIN-based on: CCMSLIB00000847637]	MS/MS | lib_lcmsms_pos | plant	CCMSLIB00005722746	[M+Ca]2+	KKJYIHSXTUGJLP-BRJCPHQQSA-N	0.00365971	19.0487	4.25162	74.51	50.612	50.612	50.612	50.612	50.612	50.612	50.612	50.612	50.612	50.612	50.612	50.612	50.612	520.32	2080.73	1368.04	1529.58	1057.18	1388.58	1544.68
5899	Dehydrophytosphingosine (not validated, isomer of 1679)	MS/MS | lib_lcmsms_pos | FooDB:Plant	PR310830	[M+H]+	CQKNELOTFUSOTP-UHFFFAOYSA-N	0.00368624	2.16883	1.11692	415.15	532.5	545.33	575.25	50.608	1844.86	1526.66	1456.99	2290.36	1392.08	1650.79	1303.67	825.73	1954.53	1980.51	2467.54	2809.96	3974.14	3912.5	2968.85	3536.69
9544	3-(2-(4-Hydroxy-3-methoxyphenyl)-3-(hydroxymethyl)-7-methoxy-2,3-dihydro-1-benzofuran-5-yl)propyl .beta.-D-glucopyranoside	MS/MS | lib_lcmsms_pos | plant	NIST_3002292	[M+NH4]+	DVWKMCPPEMUHBE-RAGYRXETSA-N	0.00395742	1.76387	0.818744	56.49	965.58	985.78	50.739	542.31	3203.33	3115.93	3100.02	2828.27	1902.24	1961.82	2877.09	2995.94	2883.26	3120.28	3341.16	3978.88	3986	3582.61	3009.94	3131.63
3868	<i>N</i>-Formyl-L-kynurenine	ChemDistiller | PlantCyc	PlantCyc::N-FORMYLKYNURENINE	[M+H]+	BYHJHXPTQMMKCA-QMMMGPOBSA-N	0.0040131	1.47962	0.565224	65.47	1640.6	1574.63	1750.69	1003.11	2890.75	2773.84	3403.06	3360.94	2460.52	2190.48	2796.45	2855.76	2870.53	3140.44	3526.75	3561.09	3014.3	3159.09	4745.76	4432.97
1129	(-)-Catechin	MS/MS | lib_lcmsms_pos | FooDB:Strawberry	NIST_1310316	[M+H-C8H8O4]+	PFTAWBLQPZVEMU-HIFRSBDPSA-N	0.00427826	1.32755	0.408765	158.68	5830.68	5341.13	5203.38	5090.35	8142.08	7671.9	5861.94	5412.6	8029.87	8366.62	8238.22	8239.07	6084.43	6176.18	8660.51	8706.52	9516.72	9997.99	10396.1	10209.3
6111	Quinoxalinedione + 2Methyl + C5H11O4	MS/MS | lib_lcmsms_pos | plant	PR310798	[M+H]+	SLOQSNHEHSCLGS-UHFFFAOYSA-N	0.00510967	1.84266	0.881792	142.31	52.285	587.22	522.85	52.285	1993.31	1924.5	1775.68	1790.76	998.11	938.29	2286.43	1903.78	1396.17	2042.52	1495.77	1776.13	2313.3	2471.56	1841.11	2070.48
1628	Isoeugenol	MS/MS | lib_lcmsms_pos | FooDB:Strawberry	NIST_1623671	[M+H-C2H4]+	BJIOGJUNALELMI-ONEGZZNKSA-N	0.00587284	1.44573	0.5318	64.09	1482.87	1772.15	1756.7	1564.01	3167.42	2845.34	3335.56	3598.16	2428	2492.33	2216.36	2320.93	3064.54	3194.95	4020.59	4075.58	4106.64	4358.22	3890.89	4088.66
6641	Kelampayoside A	MS/MS | lib_lcmsms_pos | FooDB:Plant	NIST_3302209	[M+H-C5H8O4]+	CKGKQISENBKOCA-NHBPFIHPSA-N	0.00626833	1.31384	0.393789	1070.02	2647.09	2405.53	2408.98	2340.07	3030.84	2497.46	3933.3	3731.16	2192.3	2066.22	2774.7	2968.16	3333.16	3710.82	3768.55	3921.26	3212.53	3174.62	4609.24	4332.95
6425	Eicosanoids_15-oxoETE_C20H30O3	MS/MS | lib_lcmsms_pos | plant	CCMSLIB00001058244	[M+NH4]+	YGJTUEISKATQSM-USWFWKISSA-N	0.00872145	145.569	7.18556	75.69	51.777	51.777	51.777	51.777	51.777	51.777	51.777	51.777	51.777	51.777	12710.3	12271.4	17457.2	16531.3	51.777	51.777	51.777	51.777	8029.6	8164.09
4311	&beta;-D-ribosylnicotinate	ChemDistiller | PlantCyc	PlantCyc::CPD-8259	[M+H]+	PUEDDPCUCPRQNY-ZYUZMQFOSA-N	0.00900847	1.36328	0.447081	495.31	5731.42	5526.85	5632.09	5433.88	7243.04	6683.08	6908.44	6887.58	9755.14	9341.03	8607.74	8929.38	6074.97	6850.99	9031.85	9807.02	9761.61	9423.17	12727.9	13046
6339	9-hydroxy-1,4a-dimethyl-7-propan-2-yl-2,3,4,9,10,10a-hexahydrophenanthrene-1-carboxylic acid	MS/MS | lib_lcmsms_pos | plant	VF-NPL-QEHF007945	[M+NH4]+	GPFVBJYXFRIOFB-UHFFFAOYSA-N	0.0105574	12.6119	3.65672	30.54	270.42	270.42	270.42	270.42	270.42	270.42	270.42	270.42	270.42	270.42	6283.57	6991.69	6684.7	7168.43	270.42	270.42	270.42	270.42	3025.93	2869.14
7463	N6-Succinyladenosine; AIF; CE10; MS2Dec	MS/MS | lib_lcmsms_pos | plant	MoNA018561	[M+H]+	VKGZCEJTCKHMRL-MDBUBQOGSA-N	0.0107514	1.51318	0.597584	124.29	2535.86	2210.31	2195.45	2046.72	3106.52	2864.61	3706.46	4221.5	3139.91	3051.32	3047.9	2747.66	3122.48	3674.75	3698.91	4018.35	6289.15	6794.51	5172.6	5434.96
9869	Procyanidin B2	MS/MS | lib_lcmsms_pos | FooDB:Strawberry	NIST_1112122	[M+H]+	XFZJEEAOWLFHDH-NFJBMHMQSA-N	0.0111711	1.31279	0.392632	1665.93	33045.3	32797.3	33669.5	31372.4	59788.2	56980.2	45780.6	43424.6	60659.6	59541	53322.9	53412.8	47774.1	49037.7	66419.1	69521.7	57090.9	57420.4	72013.9	74006.9
2587	Cinnamic acid ethyl ester	MS/MS | lib_lcmsms_pos | FooDB:Plant	NIST_1566215	[M+H]+	KBEBGUQPQBELIU-CMDGGOBGSA-N	0.0113498	1.2853	0.362105	82.24	3337.22	3689.14	3251.54	3299.43	6291.93	6071.96	6175.31	6368.88	4833	4880.54	5455.38	5920.96	5627.27	6303.78	6771.24	7045.87	6682.14	6641.11	5515.41	5986.95
11318	Procyanidin C1	MS/MS | lib_lcmsms_pos | FooDB:Strawberry	NIST_1112151	[M+H]+	MOJZMWJRUKIQGL-CGFIDGTHSA-N	0.0122796	2.17664	1.1221	294.88	92.597	92.597	92.597	92.597	3320.23	5463.68	92.597	1754.24	5532.67	5564.32	3460.49	4702.95	2600.45	4023.78	6118.73	6453.77	4672.87	3688.72	6093.1	6284.76
2343	L-Phenylalanine	MS/MS | lib_lcmsms_pos | FooDB:Strawberry	NIST_1251513	[M+H]+	COLNVLDHVKWLRT-QMMMGPOBSA-N	0.0124589	2.10499	1.07381	456.96	78958.9	78850.9	75537.8	75655.8	127222	118450	81802.3	84972.3	78173.8	79396.7	102579	101438	80795	91009.8	327281	327630	153322	148504	258668	259097
8516	Cyanidin 3-rutinoside cation	MS/MS | lib_lcmsms_pos | FooDB:Strawberry	NIST_1454174	[Cat-C6H10O4]+	USNPULRDBDVJAO-FXCAAIILSA-O	0.0133189	1.58009	0.660005	71.79	149487	140596	144164	141840	92487.3	162489	254813	253674	85847.9	85917.9	102330	104708	278739	293569	301170	312171	283609	291531	209553	210634
6259	1,4a-dimethyl-9-oxo-7-propan-2-yl-3,4,10,10a-tetrahydro-2H-phenanthrene-1-carboxylic acid	MS/MS | lib_lcmsms_pos | plant	VF-NPL-QEHF007960	[M+NH4]+	MSWJSDLNPCSSNW-UHFFFAOYSA-N	0.013516	35.0858	5.13282	74.77	98.028	98.028	98.028	98.028	98.028	98.028	98.028	98.028	98.028	98.028	6948.09	7493.37	7202.98	7600.07	98.028	98.028	98.028	98.028	2337.61	2419.71
11319	Procyanidin C1	MS/MS | lib_lcmsms_pos | FooDB:Strawberry	NIST_1112151	[M+H]+	MOJZMWJRUKIQGL-CGFIDGTHSA-N	0.0137153	1.29298	0.370701	811.37	10720.1	10889.9	10202.7	10239	16632.4	16285	13946.7	13828.9	18754.8	19363.4	17109.1	16614.8	14559.4	15279.4	21301.2	21015.7	15591.3	15722.8	22783	22156.6
4754	(10E,15Z)-9,12,13-Trihydroxyoctadeca-10,15-dienoic acid	MS/MS | lib_lcmsms_pos | FooDB:Plant	NIST_1869606	[M+H-3H2O]+	MKYUCBXUUSZMQB-MKZMYESJSA-N	0.0137592	1.30012	0.378645	298.31	3897.88	4088.24	4085.35	3884.4	5725.91	5180.22	4721.78	4931.27	3941.37	4119.72	4560.2	5010.73	4044.58	4358.56	5622.57	5757.03	7783.37	7712.9	6380.4	6723.98
7920	[5-ethenyl-3-hydroxy-4-(3-hydroxyprop-1-en-2-yl)-2-(3-methoxy-3-oxoprop-1-en-2-yl)-5-methylcyclohexyl] 3,4-dihydroxy-2-methylidenebutanoate	MS/MS | lib_lcmsms_pos | plant	VF-NPL-QTOF006341	[M+H]+	PUUYULQKNFTVDK-UHFFFAOYSA-N	0.0139608	2.36816	1.24377	291.64	51.39	51.39	51.39	51.39	3104.59	2754.53	2333.49	2288.84	1364.02	51.39	541.78	902.65	3466.66	3692.08	4728.1	4869.77	2783.35	2508.46	2673.64	2493.96
8543	Eriodictyol-7-O-glucoside	MS/MS | lib_lcmsms_pos | FooDB:Plant	NIST_1154515	[M+H]+	RAFHNDRXYHOLSH-SFTVRKLSSA-N	0.0146106	1.17586	0.233716	56.1	2472.12	2531.42	1627.22	2168	3073.82	2829.44	2533.99	2746.53	2391.75	2000.94	2496.99	2555.31	2851.62	3252.42	2715.58	2998.3	2960.21	3215.33	2764.44	2851.65
2260	Coniferyl alcohol	MS/MS | lib_lcmsms_pos | FooDB:Strawberry	NIST_1371478	[M+H-H2O]+	JMFRWRFFLBVWSI-NSCUHMNNSA-N	0.0171755	11.4252	3.51415	95.21	52.032	52.032	52.032	52.032	52.032	52.032	52.032	52.032	52.032	52.032	52.032	52.032	52.032	52.032	540.14	582.95	1455.38	1584.01	520.32	1053.85
9352	1-Linoleoyl-sn-glycero-3-phosphorylcholine	MS/MS | lib_lcmsms_pos | FooDB:Strawberry	NIST_1943374	[M+H]+	SPJFYYJXNPEZDW-UTJQPWESSA-N	0.0206219	1.6411	0.714667	1489.13	122320	117131	114242	116824	102724	102872	80681.4	83040.6	100890	108375	149992	150940	71831.1	72856.2	130806	128384	256423	251461	254110	254878
7327	2-Linoleoylglycerol	MS/MS | lib_lcmsms_pos | FooDB:Strawberry	NIST_1112244	[M+Na]+	IEPGNWMPIFDNSD-HZJYTTRNSA-N	0.0222094	0.452669	-1.14347	285.11	33383.9	29815.3	31697	29229	12287.2	11787.6	44098.9	41670.1	5610.49	6233.26	1605.41	1508.13	24499.7	24509.6	8220.03	7680.14	7012.77	6968.55	15151.3	14116.2
8839	Folinic acid	MS/MS | lib_lcmsms_pos | FooDB:Strawberry	FiehnHILIC001946	[M+H]+	VVIAGPKUTFNRDU-ABLWVSNPSA-N	0.0236796	1.34526	0.427882	134.71	1473.02	1964.5	1233.62	1584.84	3562.9	3565.47	2421.34	2728.23	1730.98	2165.61	3064.16	3130.24	2237.12	2235.29	2727.22	2765.01	3620.86	3438.69	3365.36	3590.86
1286	1,3,5-Benzenetriol	MS/MS | lib_lcmsms_pos | FooDB:Strawberry	NIST_1627112	[M+H]+	QCDYQQDYXPDABM-UHFFFAOYSA-N	0.0251707	6.67107	2.73792	9.65	51.226	51.226	51.226	51.226	51.226	51.226	51.226	51.226	51.226	51.226	51.226	51.226	51.226	524.48	516.51	512.26	51.226	51.226	1043.25	564.69
11097	1-Palmitoyl-2-linoleoyl-sn-glycero-3-phosphocholine	MS/MS | lib_lcmsms_pos | FooDB:Strawberry	NIST_1150354	[M+H]+	JLPULHDHAOZNQI-ZTIMHPMXSA-N	0.0258078	0.0292235	-5.09673	91.17	8333.48	106.603	8150.73	106.603	10492.2	106.603	6167.27	106.603	2801.8	106.603	106.603	106.603	106.603	106.603	106.603	106.603	106.603	106.603	106.603	106.603
3538	2,10-Bisaboladiene-1,4-diol	MS/MS | lib_lcmsms_pos | FooDB:Plant	NIST_3278678	[M+H-H2O]+	FPSDOHYYKFXKFR-MYPMTAMASA-N	0.0259607	1.42074	0.506646	675.23	49271.2	47383.3	48203.6	45657.4	49358.7	47830.8	61041.7	61275.8	59631.5	63256.8	47095.8	49496.4	58464.9	63576.2	79536.5	81851.9	68655.8	66517.4	118187	123748
7921	(3E)-4-(1-Hydroxy-2,2,6-trimethyl-4-oxocyclohexyl)but-3-en-2-yl hexopyranoside	MS/MS | lib_lcmsms_pos | FooDB:Plant	NIST_1870104	[M+Na]+	QFTPTUOKFIIFJH-AATRIKPKSA-N	0.0266493	1.28524	0.362043	359.99	3868.31	3700.08	3702.71	3670.19	3836.38	3480.5	4184.62	4493.57	6383.97	6066.73	5848.92	5617.9	3844.53	4252.55	5893.81	6094	4677.78	4649.79	7531.18	7352.51
1575	(S)-(-)-Pulegone	MS/MS | lib_lcmsms_pos | FooDB:Strawberry	NIST_1686169	[M+H-H2O]+	NZGWDASTMWDZIW-QMMMGPOBSA-N	0.0267641	4.45744	2.15621	115.55	53.966	53.966	53.966	53.966	53.966	53.966	647.85	1513.84	53.966	53.966	53.966	53.966	1516.48	1843.75	1461.47	1434.72	53.966	53.966	2504.46	2583.25
633	cis-Jasmone	MS/MS | lib_lcmsms_pos | FooDB:Plant	NIST_1461064	[M+H-C3H6O]+	XMLSXPIVAXONDL-PLNGDYQASA-N	0.0274119	1.36019	0.443807	12.49	4396.35	4528.04	4686.34	4240.72	4809.71	4169.92	5378.82	5473.61	5590.39	5686.74	4386.08	4762.8	5294.16	5516.74	6981.62	6959.02	5994.29	6087.16	10324.1	10289.7
9104	1-Palmitoyl-sn-glycero-3-phosphocholine	MS/MS | lib_lcmsms_pos | FooDB:Strawberry	NIST_1390999	[M+H]+	ASWBNKHCZGQVJV-HSZRJFAPSA-N	0.0287333	1.33673	0.418708	1845.05	171478	171645	181471	180483	144804	138900	154710	152217	106105	114575	161936	161912	123519	126086	194505	198870	279366	282536	246646	251624
8717	Delphinidin 3-galactoside cation	MS/MS | lib_lcmsms_pos | FooDB:Strawberry	NIST_1454933	[Cat]+	XENHPQQLDPAYIJ-YXRUOGEQSA-O	0.0292571	1.21448	0.280344	359.01	4166.25	4071.25	4006.96	3800.8	6029.75	5864.51	5527.36	5661.01	6211.12	6540.89	5402.44	5604.66	6081.13	6632.4	6983.26	7366.45	5145.76	4776.16	7153.53	7861.55
4979	L-Tyrosine	MS/MS | lib_lcmsms_pos | FooDB:Strawberry	KNA00172		OUYCCCASQSFEME-QMMMGPOBSA-N	0.0306607	1.23681	0.306622	1499.51	45065.6	44790.5	43598.7	43461.3	58469.6	54193.9	67512.6	66588.7	62872.1	63085.4	56478.8	57200	53877.9	58653.6	56582.4	59635.4	87725.2	83623.9	82570.5	83449.6
1996	Gallic acid	MS/MS | lib_lcmsms_pos | FooDB:Strawberry	NIST_1340510	[M+H-H2O]+	LNTHITQWFMADLM-UHFFFAOYSA-N	0.031397	2.38478	1.25385	347.82	953.47	55.51	55.51	55.51	3203.42	3084.56	903.47	55.51	1926.33	2260.4	55.51	556.12	1774.39	2250.47	5422.53	6187.5	3866.18	3604.81	2835.45	3384.79
8693	NCGC00169021-02!(2S,3S,4S,5R,6S)-6-[5,7-dihydroxy-2-(4-hydroxyphenyl)-4-oxochromen-3-yl]oxy-3,4,5-trihydroxyoxane-2-carboxylic acid	MS/MS | lib_lcmsms_pos | FooDB:Strawberry	CCMSLIB00000846803	[M+H]+	FNTJVYCFNVUBOL-ZUGPOPFOSA-N	0.0321967	1.28071	0.356943	2124.17	18606.1	17332	17386.2	17726.6	26111.4	24761.4	21385.8	21708.8	15878.8	16677.4	13809.8	14882.6	24591.3	26182.6	25790.3	26662.7	33468.9	32778.3	27044.7	27824.2
1127	3,5-Dihydroxybenzenemethanol	MS/MS | lib_lcmsms_pos | plant	NIST_1332679	[M+H-H2O]+	NGYYFWGABVVEPL-UHFFFAOYSA-N	0.032277	1.52599	0.60975	520.7	29324.9	28278.6	31206.6	29502.6	31317.7	24561.8	35218.5	34232.3	22945.9	23734.2	21404.8	22935.6	30090.6	31244.7	54319.9	59669.8	39773.2	40231.5	71038.1	72323.3
536	1-(2-Hydroxy-4-methoxyphenyl)-3-phenyl-1-propanone	MS/MS | lib_lcmsms_pos | FooDB:Plant	NIST_3188172	[M+H-C8H8O3]+	FQCZZYGBJVMLOG-UHFFFAOYSA-N	0.0333939	1.32363	0.4045	140.78	6049.51	5658.31	5941.78	5652.71	6238.73	5557.85	7084.48	7524.54	6793.82	7132.17	5736.15	5632.14	6511	7649.78	8778.66	9159.78	7449.41	7802.71	12438.6	13069.5
5048	Kaempferol	MS/MS | lib_lcmsms_pos | FooDB:Strawberry	RIKENPlaSMA002180	[M+H]+	IYRMWMYZSQPJKC-UHFFFAOYSA-N	0.0355848	1.33461	0.416417	349.53	6507.73	6327.17	5979	6146.43	10837.2	10686.4	12547.9	13939	11978.7	12731.6	7371.17	7443.95	12768.3	13788.1	14810.2	14546.6	16533.8	16753	13183.2	13167.7
5108	(-)-Gallocatechin 3-gallate	MS/MS | lib_lcmsms_pos | FooDB:Plant	NIST_1450243	[M+H-C7H6O5]+	WMBWREPUVVBILR-NQIIRXRSSA-N	0.0366188	1.27195	0.347043	1743.02	56198.3	53837.6	51336.9	54777.6	104291	102942	76751.2	76104.1	61182.4	61916.6	62363.4	64322.7	87381.1	92161.3	82266.2	87372.1	116618	115619	90379	91040.2
9624	3-(4-((1,3-Dihydroxy-1-(4-hydroxy-3-methoxyphenyl)propan-2-yl)oxy)-3-methoxyphenyl)propyl 6-deoxy-.alpha.-L-mannopyranoside	MS/MS | lib_lcmsms_pos | plant	NIST_1945334	[M+Na]+	HZGGHVGIXDRDDH-GQEDLCMVSA-N	0.036988	1.34504	0.427649	3535.17	47364.8	45736.1	46660.8	46872.3	60398.6	58114	89163.9	91584.8	40836	43097.4	44921.2	47116.7	62628.6	64527.8	99639.6	99032.7	84575.9	85781.3	91495.3	86723.3
8721	Neohesperidin	MS/MS | lib_lcmsms_pos | FooDB:Plant	NIST_1556930	[M+H-C6H10O4]+	ARGKVCXINMKCAZ-UZRWAPQLSA-N	0.0385532	0.60057	-0.735596	188.03	19898	20860.8	19953.6	19776	11218.5	9380.59	20178	19366.4	4208.7	4264.47	2273.68	1745.83	12352.9	14603.3	6072.05	6232.12	9994.72	9403.52	14100.5	12769.5
5979	Tyr-His	MS/MS | lib_lcmsms_pos | plant	NIST_1634694	[M+H]+	ZQOOYCZQENFIMC-STQMWFEESA-N	0.0387154	1.48151	0.567073	235.4	12650.5	11328	11404.3	11335.8	17667.2	16310.2	6739.92	6523.66	8103.78	7976.97	26528.6	25816	17858.9	19155.2	12472.4	13731.9	8113.64	8276.04	15646.1	15427.6
6106	D-(+)-Cellobiose	MS/MS | lib_lcmsms_pos | FooDB:Strawberry	NIST_1541848	[M+H-H2O]+	GUBGYTABKSRVRQ-QRZGKKJRSA-N	0.0433797	0.907026	-0.140784	207.69	15774.4	15985.4	15062.6	15156.3	12134.5	10790.9	13653.7	13975.8	13838.6	13762.9	12677.8	13156.9	12709	14225.5	12678.8	13812.9	12402.1	12458.8	10899.1	12085.3
8544	Eriodictyol-7-O-glucoside	MS/MS | lib_lcmsms_pos | FooDB:Plant	RIKENPlaSMA002528	[M+H]+	RAFHNDRXYHOLSH-RGHIGTIISA-N	0.0441197	1.26169	0.335359	376.14	14277	14523.9	12945.4	14001.8	27177.2	25928.8	19541.5	20197.9	16081.3	16375.3	16458.1	16508.6	22150.8	23685.2	20695.2	21916.7	30473	30385.4	22698.9	23457.3
9312	(2R,3R,4S,5S,6R)-2-[(3R)-1,7-bis(3,4-dihydroxyphenyl)heptan-3-yl]oxy-6-(hydroxymethyl)oxane-3,4,5-triol	MS/MS | lib_lcmsms_pos | plant	VF-NPL-QEHF006382	[M+Na]+	LSEDQFLRUJOXDX-SBOHWPTNSA-N	0.0447759	1.30471	0.383733	77.31	3218.27	3038.56	3068.71	3177.28	4088.29	3916.44	4700.32	4787.66	2431.61	2622.94	1951.91	2406.16	4622.97	4933.44	5655.39	5559.01	5462.7	5215.06	4990.71	4932.95
9330	1-Palmitoyl-sn-glycero-3-phosphocholine	MS/MS | lib_lcmsms_pos | FooDB:Strawberry	NIST_1391065	[M+Na]+	ASWBNKHCZGQVJV-HSZRJFAPSA-N	0.0452615	1.59399	0.672639	739.68	58792.1	58038.6	57365	58540.7	41359.8	41988.8	52222.1	52668.1	46520.1	48574.3	54288.9	55034.9	38443.2	40557.9	58605.2	57582.5	121318	122840	135810	138127
8092	NCGC00385106-01_C18H26O10_beta-D-Glucopyranoside, phenylmethyl 6-O-[(2R,3R,4R)-tetrahydro-3,4-dihydroxy-4-(hydroxymethyl)-2-furanyl]-	MS/MS | lib_lcmsms_pos | FooDB:Plant	CCMSLIB00000854308	[M+Na]+	NJMQSVWMCODQIP-FQXXIRCGSA-N	0.0465105	1.19336	0.255028	582.28	16996.8	16677.7	16033.1	16855.2	20013.3	18556.2	16498.4	16138.7	18064.9	18113.4	16401.1	16776.4	17495.3	18737.3	27355.6	27450.9	17458.7	17352	24238.8	24315.8
5168	(-)-Epicatechin	MS/MS | lib_lcmsms_pos | FooDB:Strawberry	FIO00070	[M+H]+	PFTAWBLQPZVEMU-UKRRQHHQSA-N	0.0465312	1.25225	0.324518	4875.99	20278.4	19516.8	19858.3	20508.2	21026.3	19875.5	22950.4	23589.9	33685.6	33363.7	26892.4	28278.7	22278.7	24698.5	36396.4	38407.1	21866.2	22251.2	35909	36865.5
4346	5-methylcytidine	ChemDistiller | PlantCyc	PlantCyc::CPD0-2495	[M+H]+	ZAYHVCMSTBRABG-JXOAFFINSA-N	0.0467731	1.35437	0.437624	792.6	27844.7	29020.4	28085.9	29008.3	50793.8	48084.3	33541.9	30683.9	49881.7	51488.2	46968.2	47491.2	41344.2	43798	48332.3	48842.4	81210.4	81427.3	36240.9	36884.3

## Sheet: LEAVES-BF vs. LEAVES-CONTROL
Alignment ID	Metabolite name	Annotation source	Library ID	Adduct type	INCHIKEY	pvalue	fc	fc2	S/N average	Leaf A1 MS1-1	Leaf A1 MS1-2	Leaf A2 MS1-1	Leaf A2 MS1-2	Leaf A3 MS1-1	Leaf A3 MS1-2	Leaf A4 MS1-1	Leaf A4 MS1-2	Leaf A5 MS1-1	Leaf A5 MS1-2	Leaf B1 MS1-1	Leaf B1 MS1-2	Leaf B2 MS1-1	Leaf B2 MS1-2	Leaf B3 MS1-1	Leaf B3 MS1-2	Leaf B4 MS1-1	Leaf B4 MS1-2	Leaf B5 MS1-1	Leaf B5 MS1-2
8839	Folinic acid	MS/MS | lib_lcmsms_pos | FooDB:Strawberry	FiehnHILIC001946	[M+H]+	VVIAGPKUTFNRDU-ABLWVSNPSA-N	6.45923e-07	2.3755	1.24823	134.71	9256.01	9482.62	6170.85	5903.91	4596.15	4144.76	4449.41	4370.01	4743.89	4497.26	11000.1	10271.3	11607.4	11325.4	14117	14095.8	17789.3	16988.4	14542.1	15127.2
4806	Nicotinamide N-oxide	MS/MS | lib_lcmsms_pos | plant	NIST_1360071	[2M+H]+	USSFUVKEHXDAPM-UHFFFAOYSA-N	1.5951e-06	0.757813	-0.400086	465.16	37733.3	36479.5	44717.8	41486.6	44825.6	44793	47606.9	43747.1	47315.2	43992.1	33841.8	30073.7	38041.5	35067.3	30672.4	29467.3	34063.6	33564.3	30986.3	32125.5
2909	Scopoletin	MS/MS | lib_lcmsms_pos | FooDB:Strawberry	FIO00948	[M+H]+	RODXRVNMMDRFIK-UHFFFAOYSA-N	5.79144e-06	6.97728	2.80267	52.38	2226.79	1728.35	52.827	52.827	52.827	52.827	52.827	52.827	52.827	52.827	3105.87	3037.66	1666.94	1593.06	4230.53	3999.07	4329.37	3607.1	2561.26	2413.98
1607	Isopentenyladenine	MS/MS | lib_lcmsms_pos | FooDB:Strawberry	NIST_1370113	[M+H-C5H8]+	HYVABZIGRDEKCD-UHFFFAOYSA-N	6.59314e-06	1.69099	0.757865	125.72	20978.1	20828.2	15171.8	15356.1	12842.7	13217.8	11519.9	11198.7	10869.7	10278.1	22949.7	22086.3	21071.4	19233.1	26965.6	26058.7	25776.8	24232.9	25733.7	26453.4
7856	dADP	ChemDistiller | PlantCyc	PlantCyc::DADP	[M+H]+	DAEAPNUQQAICNR-RRKCRQDMSA-K	1.30017e-05	0.885668	-0.175163	668.13	37054.4	34823.4	38137	35327.5	38650.4	37243.1	38626	36012.1	39595.3	37931.3	35493.2	33019.4	32527.1	29762	35183.3	34221.2	33034.2	31856.1	32418.3	33194
5372	5'-S-Methyl-5'-thioadenosine	MS/MS | lib_lcmsms_pos | FooDB:Strawberry	NIST_1348987	[M+H]+	WUUGFSXJNOTRMR-IOSLPCCCSA-N	1.36091e-05	1.75036	0.807649	602.39	58324.3	52891	44184.3	38978.7	32878.4	33024.9	28414.4	26290	27925.8	25095	60066.9	56426.8	55983.7	49975.5	74947.6	71690.9	68687.1	64265	71303	70796.6
3005	Isobutyrylphloroglucinol	MS/MS | lib_lcmsms_pos | FooDB:Strawberry	NIST_3053451	[M+H]+	BNEBXEZRBLYBCZ-UHFFFAOYSA-N	2.19155e-05	1.59068	0.669643	276.31	26512.9	26772	15912.1	15544.6	12880.6	13573.6	19627.1	19937.2	20108.9	18658.1	37146	35392.9	30345.6	29126	29322	27068.8	31605.7	30191	25564.9	25714.1
3485	Phomalone	MS/MS | lib_lcmsms_pos | plant	NIST_1958928	[M+H-2H2O]+	PTBQWWHUOMDVFS-UHFFFAOYSA-N	2.58955e-05	3.11838	1.64079	70.07	1757.58	570.29	1602.75	1459.38	639.49	519.3	545.12	51.93	51.93	51.93	2802.8	2610.19	2452.96	1872.58	2819.32	2624.35	1861.04	988.21	2347.57	2228.27
3868	<i>N</i>-Formyl-L-kynurenine	ChemDistiller | PlantCyc	PlantCyc::N-FORMYLKYNURENINE	[M+H]+	BYHJHXPTQMMKCA-QMMMGPOBSA-N	2.7093e-05	1.72896	0.789901	65.47	5272.26	5163.4	3589.08	3081.31	2782.39	2520.33	3600.52	3398.07	3627.07	3402.17	8601.83	7745.25	5120.23	4599.63	6513.82	6149.29	6518.34	5822.87	5905.81	6020.21
1617	DL-Octopamine	MS/MS | lib_lcmsms_pos | FooDB:Plant	NIST_1056719	[M+H-H2O]+	QHGUCRYDKWKLMG-UHFFFAOYSA-N	2.73744e-05	2.63499	1.3978	1650.41	36680.6	34751.1	29687.7	26876.7	23393.4	22373.7	3924.96	12529.9	322.451	3224.51	56251.9	50209.8	52826.3	51686.3	35927.7	33902.6	71631.6	65797.7	45957.6	46376.8
1534	(.+/-.)7-epi-Jasmonic acid	MS/MS | lib_lcmsms_pos | FooDB:Strawberry	NIST_1298664	[M+H-C2H6O3]+	ZNJFBWYDHIGLCU-QKMQQOOLSA-N	3.0757e-05	5.13999	2.36177	92.38	3131.55	2716.1	66.272	66.272	66.272	66.272	66.272	66.272	66.272	66.272	2718.65	2440.05	3237.18	2843.05	3175.72	2801.3	4723.96	4538.07	3262.27	3041.71
2856	Kynurenic acid	MS/MS | lib_lcmsms_pos | plant	NIST_1054519	[M+H]+	HCZHHEIFKROPDY-UHFFFAOYSA-N	4.10988e-05	1.90053	0.926399	277.2	36673.2	37099.2	22464	21804.2	16920.7	18738.4	16446.4	15843.1	16477	15212.2	52006.9	48604.2	28494.9	27624.5	45680.9	44661.8	40731.8	38564.5	43830.1	43504
1662	(-)-Epigallocatechin	MS/MS | lib_lcmsms_pos | FooDB:Strawberry	NIST_1288079	[M+H-C8H8O4]+	XMOCLSLCDHWDHP-IUODEOHRSA-N	4.58969e-05	1.45592	0.541936	432.38	25371.4	23525.1	18008.6	16777.4	14682.3	15199.6	16259.9	15407.6	15745.4	14364.8	23627	20749.8	26383.7	24252.8	27000.9	25269.6	27950	26360	26427.6	27263.3
5388	Aceritannin	MS/MS | lib_lcmsms_pos | plant	NIST_1914858	[M+H-C7H6O5]+	IGKWMHUOBKCUQU-LTCOOKNTSA-N	7.58793e-05	2.06517	1.04626	115.89	8484.38	8334	7283.55	7010.74	5321.61	5839.34	4376.97	4596.25	4411.13	4690.84	14524.5	13956.6	16211.6	15168.9	6752.65	6748.27	12627.8	12838.2	12854.2	12947.6
1575	(S)-(-)-Pulegone	MS/MS | lib_lcmsms_pos | FooDB:Strawberry	NIST_1686169	[M+H-H2O]+	NZGWDASTMWDZIW-QMMMGPOBSA-N	8.2589e-05	2.12703	1.08884	115.55	5886.05	5737.82	3187.83	3004.77	2327.72	2554.96	1483.56	1950.77	2602.02	2625.89	5373.09	4713.17	6775.38	5874.78	6046.06	5504.27	9881.05	9006.64	7013.11	6518.97
534	3-Methyl-5-phenylpentan-1-ol	MS/MS | lib_lcmsms_pos | plant	NIST_3341850	[M+H-C4H10O]+	OXYRENDGHPGWKV-UHFFFAOYSA-N	8.35372e-05	3.74475	1.90487	113.65	3280.21	3287.84	1502.87	559.14	541.57	54.157	54.157	54.157	54.157	54.157	3139.93	2849.9	3462.96	2785.05	3596.41	3099.73	4990.03	4650.2	3509.24	3276.04
7553	Tuberonic acid glucoside	MS/MS | lib_lcmsms_pos | FooDB:Plant	NIST_3313120	[M+H]+	JFDNMLUPLXZXGV-YAYCWVCRSA-N	8.88328e-05	2.34305	1.22839	97.56	3308.51	3141.95	1028.42	1622.75	102.842	102.842	1882.1	1349.61	1852.52	1300.46	2673.26	2484.12	4152.41	4012.72	3958.54	4055.76	4168.32	3562.67	3798.22	3901.16
8290	5,7-Dihydroxy 3,3',4',5',6,8-hexamethoxyflavone	MS/MS | lib_lcmsms_pos | plant	NIST_1445515	[M+H]+	QXRNWRWFNALYGH-UHFFFAOYSA-N	9.79943e-05	2.0507	1.03611	117.33	9231.15	8485	5643.55	5047.68	4506.33	4421.9	3606.53	3399.33	3581.93	3358.84	8920.31	8260.31	7658	7439.85	9898.48	9173.88	14118.8	13293.7	13539.6	12861.3
1127	3,5-Dihydroxybenzenemethanol	MS/MS | lib_lcmsms_pos | plant	NIST_1332679	[M+H-H2O]+	NGYYFWGABVVEPL-UHFFFAOYSA-N	0.000103932	2.37661	1.2489	520.7	10323.2	9885.67	8865.5	8400.64	6838.38	6861.98	4098.2	4346.31	3935.42	4016.25	17813.5	16797.6	17232.3	17214.7	8825.81	8739.37	23157.8	22395.8	14222.8	14191.4
2861	N-Acetyl-L-glutamic acid	MS/MS | lib_lcmsms_pos | FooDB:Strawberry	NIST_1180206	[M+H]+	RFMMMVDNIPUKGG-YFKPBYRVSA-N	0.000107054	2.54364	1.34689	71.29	4169.42	4131.9	3074.39	2740.56	2389.04	2282.77	546.82	546.52	570.76	52.16	3395.73	2580.72	5370.32	4727.46	6128.59	5478.1	6206.35	5613.11	5958.11	6697.16
1628	Isoeugenol	MS/MS | lib_lcmsms_pos | FooDB:Strawberry	NIST_1623671	[M+H-C2H4]+	BJIOGJUNALELMI-ONEGZZNKSA-N	0.000118205	1.48823	0.573599	64.09	8541.31	8614.15	6155.58	6133.79	5526.43	5041.28	5454.55	5067.92	4954.25	5106.95	10102.1	9549.86	7506.68	6969.73	10482	10404.1	7968.24	7834.8	9625.77	9737.84
1084	Chorismic acid	MS/MS | lib_lcmsms_pos | FooDB:Strawberry	NIST_1296313	[M+H-C3H6O4]+	WTFXTQVDAKGDEY-HTQZYQBOSA-N	0.000138014	1.48078	0.566356	579.28	71880.6	69036.9	51355.2	47515.8	42183.6	41711.5	41332.3	39171.7	42405.7	38961.3	61498.1	55339.7	71187.4	66954.7	77961	72008.9	81420.1	73340.8	82061.2	77227
2732	Chelidonic acid	MS/MS | lib_lcmsms_pos | FooDB:Plant	NIST_1444307	[M+H]+	PBAYDYUZOSNJGU-UHFFFAOYSA-N	0.000141711	1.19666	0.259012	3100.67	265705	264509	226994	218517	223662	230402	206635	215314	215692	222947	243514	243882	258272	260275	292520	282594	307987	289067	276198	286490
3123	Bisabolol oxide A	MS/MS | lib_lcmsms_pos | FooDB:Plant	NIST_1454519	[M+H-2H2O]+	WJHRAVIQWFQMKF-IPYPFGDCSA-N	0.000148683	2.31392	1.21034	151.76	11028.6	11139	5509.34	5194.87	4302.92	4183.91	3729.47	3564.36	3594.5	3262.18	9448.35	8622.35	12165.9	11537.5	11350	11219.9	20087.4	18734.3	12627	12650.9
2705	L-Tyrosine	MS/MS | lib_lcmsms_pos | FooDB:Strawberry	NIST_1187798	[M+H]+	OUYCCCASQSFEME-UHFFFAOYSA-N	0.000165614	2.51833	1.33247	1625.02	24994.2	23188.1	21855.2	19504.8	16106.5	16333	10199.1	8930.23	9772.93	8235.12	43921.6	38536.8	45731.6	42803.1	21012.8	21072.9	61387.4	56555.1	35475	34217.8
7241	1-Naphthaleneacetamide	MS/MS | lib_lcmsms_pos | plant	NIST_1531750	[2M+H]+	XFNJVKMNNVCYEK-UHFFFAOYSA-N	0.000254946	1.63136	0.706079	82.86	3738.82	3736.4	2567.63	2178.2	751.11	1940.16	3045.71	2856.21	2826.77	2320.98	3991.72	3893.39	3398.83	3133.46	5471.79	5026.44	4519.71	4025.53	4403	4489.59
494	Phenylacetaldehyde	MS/MS | lib_lcmsms_pos | FooDB:Strawberry	NIST_1192288	[M+H-H2O]+	DTUQWGWMVIHBKE-UHFFFAOYSA-N	0.000265788	1.82981	0.871691	60.81	3600.61	3151.78	2573.04	2420.82	525.59	620.57	1902.04	1866.61	2202.81	1703.88	4031.78	3630.37	4298.65	3765.39	3345.97	3322.34	4406.77	3493.3	3794.5	3545.94
1068	L-Phenylalanine	MS/MS | lib_lcmsms_pos | FooDB:Strawberry	NIST_1251530	[M+H-CH2O2]+	COLNVLDHVKWLRT-QMMMGPOBSA-N	0.000278764	4.51967	2.17622	115.37	2450.52	1653.21	53.071	53.071	53.071	53.071	53.071	53.071	53.071	53.071	2982.96	2628.55	822.85	1458.55	2633.36	2465.95	1769.36	1265.05	2084.01	2355.79
6641	Kelampayoside A	MS/MS | lib_lcmsms_pos | FooDB:Plant	NIST_3302209	[M+H-C5H8O4]+	CKGKQISENBKOCA-NHBPFIHPSA-N	0.000359907	1.51002	0.594568	1070.02	153952	151943	110986	104416	81194.6	83470.8	90340	86942.1	74207.6	72113.8	162448	155641	122959	118344	180726	174242	156923	143907	157886	151389
2789	1-fluoro-2,4-dinitrobenzene	ChemDistiller | PlantCyc	PlantCyc::CPD-8983	[M+H]+	LOTKRQAVGJMPNV-UHFFFAOYSA-N	0.000379136	1.28314	0.359683	29.01	4310.63	4281.71	3331.73	3177.59	2986.52	3088.53	3003.61	2805.28	3144.82	2875.59	4146.47	3705.05	4109.3	3942.72	4548.8	4161.41	4983.6	4491.33	3959.45	4303.33
4871	Tyr-Pro	MS/MS | lib_lcmsms_pos | plant	NIST_1630105	[M+H]+	VNYDHJARLHNEGA-RYUDHWBXSA-N	0.000411599	1.67116	0.740853	153.52	6080.56	5773.57	4171.19	4027.75	3086.83	3308.05	2539.08	2191.15	2500.17	2366.76	7666.28	7315.17	5188.81	4779.35	5343.75	5200.6	7019.69	6536.8	5928.89	5257.94
4979	L-Tyrosine	MS/MS | lib_lcmsms_pos | FooDB:Strawberry	KNA00172		OUYCCCASQSFEME-QMMMGPOBSA-N	0.00042575	2.41832	1.27401	1499.51	55021	55299.1	40917.3	37454.3	32592.4	32173	16338.3	15150	15841.7	15600.8	38294.7	34257.7	102210	96553.5	68198.6	65192.5	113230	102417	71490.9	73283.7
4732	Trimethoprim	MS/MS | lib_lcmsms_pos | plant	NIST_1367556	[M+H-CH4]+	IEDVJHCEMCRBQM-UHFFFAOYSA-N	0.000519608	0.893016	-0.163242	68.87	4282.04	3919.79	4138.85	3831.35	3426.44	3731.63	4165.61	3705.25	3849.21	3768.08	3532.99	3274.82	3613.77	3333.91	3559.1	3504.68	3733.58	3387.2	3268.36	3456.9
1970	Methylisoeugenol	MS/MS | lib_lcmsms_pos | FooDB:Plant	NIST_1687442	[M+H-C2H4]+	NNWHUJCUHAELCL-SNAWJCMRSA-N	0.000573672	1.53691	0.620035	72.12	5277.93	5065.03	3486.79	3314.84	2965.3	2876.39	3603.26	3240.08	3246.39	3347.22	6639.19	6528.2	3776	3540.02	6873.71	6471.36	5164.2	5088.64	5857.93	6040.07
2343	L-Phenylalanine	MS/MS | lib_lcmsms_pos | FooDB:Strawberry	NIST_1251513	[M+H]+	COLNVLDHVKWLRT-QMMMGPOBSA-N	0.000653874	1.71147	0.775239	456.96	343096	341996	199573	185553	157400	161934	253132	241040	245241	235459	643178	556890	373464	347841	362931	347912	360508	362126	330542	361255
7933	NCGC00384571-01!(E)-3-(4-hydroxyphenyl)-N-[3-[[(E)-3-(4-hydroxyphenyl)prop-2-enoyl]-[4-[[(E)-3-(4-hydroxyphenyl)prop-2-enoyl]-[3-[[(E)-3-(4-hydroxyphenyl)prop-2-enoyl]amino]propyl]amino]butyl]amino]propyl]prop-2-enamide [IIN-based on: CCMSLIB00000847637]	MS/MS | lib_lcmsms_pos | plant	CCMSLIB00005722746	[M+Ca]2+	KKJYIHSXTUGJLP-BRJCPHQQSA-N	0.000665515	6.40329	2.67881	74.51	1350.8	935.28	506.12	515.63	50.612	50.612	50.612	50.612	50.612	50.612	2740.11	2339.97	50.612	50.612	2856.31	2649.17	3036.93	2448.24	3552.05	3401.5
1855	5-Hydroxyindole-3-acetic acid	MS/MS | lib_lcmsms_pos | FooDB:Strawberry	NIST_1347758	[M+H-CH2O2]+	DUUGKQCEGZLZNO-UHFFFAOYSA-N	0.000730017	1.70419	0.769086	1384.3	3640.38	3591.93	3185.58	2823.81	2318.99	2199.3	2719.9	2029.82	2810.03	2534.63	5724.25	4941.35	2762.29	2560.4	6285.74	6142.66	5090.95	5187.68	4319.15	4454.67
2588	Cinnamic acid ethyl ester	MS/MS | lib_lcmsms_pos | FooDB:Plant	NIST_1566215	[M+H]+	KBEBGUQPQBELIU-CMDGGOBGSA-N	0.000784014	2.16924	1.11719	72.24	5211.14	5072.26	3015.59	2218.33	1820.57	1558.16	2003.79	1692.23	1958.02	2152.41	5279.98	4860.01	3409.63	3595.41	9184.25	9087.48	6274.45	5624.36	5411.06	5197.51
1286	1,3,5-Benzenetriol	MS/MS | lib_lcmsms_pos | FooDB:Strawberry	NIST_1627112	[M+H]+	QCDYQQDYXPDABM-UHFFFAOYSA-N	0.00097183	2.0252	1.01807	9.65	5298.78	5191.9	3039.94	2723.3	1978.77	1536.42	3123.53	3120.6	3411.49	2608.43	10976.2	10067.3	6074.79	6244.14	5024.06	4782.09	5731.98	5673.43	5242.22	5057.43
3430	noraucuparin	ChemDistiller | PlantCyc	PlantCyc::CPD-18575	[M+H]+	CDSGSEYGSWGVOJ-UHFFFAOYSA-N	0.00107031	1.58919	0.668287	33.03	4095.79	3974.19	2831.31	2514.7	2468.54	2311.04	2316.93	2107.49	1964.95	2331.39	5620.11	4986.19	2724.84	2735.46	5201.25	4924.78	3859.59	3475.96	4698.86	4548
6570	(1S,4R,7S,8S,11S)-9-tert-butyl-7,9-dihydroxy-3,5,12-trioxatetracyclo[6.6.0.0¹,¹¹.0⁴,⁸]tetradecane-2,6,13-trione	MS/MS | lib_lcmsms_pos | FooDB:Plant	VF-NPL-QEHF008442	[M+NH4]+	MOLPUWBMSBJXER-YSXCXNLVSA-N	0.00115786	1.4704	0.556211	92.69	6059.96	5520.76	4181.6	3483.85	3067.43	2890.46	4166.48	3898.97	3935.57	3870.62	4645.99	4132.19	7477.26	6568.52	5232.49	4800.43	7361.99	6731.02	6939.58	6508.33
8378	2-Phenylethyl 6-O-pentopyranosylhexopyranoside	MS/MS | lib_lcmsms_pos | FooDB:Plant	NIST_1811973	[M+Na]+	ZRGXCWYRIBRSQA-UHFFFAOYSA-N	0.0012063	1.18149	0.240604	509.17	23751.3	24415.6	22587	21792.1	18519	19609.9	19352.5	19156.8	18863.7	18989.3	24118.9	23368.1	22623.7	22207.6	28239.3	27346.1	22480.8	22839.9	25702.5	25685.1
6226	Longilactone	MS/MS | lib_lcmsms_pos | plant	NIST_3082911	[M+H-2H2O]+	KBBRVTNGCNCUCX-IRLOYWMGSA-N	0.00121724	1.56055	0.642057	122.44	15417.2	15970.4	11991.5	11288.4	10186.9	9774.54	10992.6	10717.5	10673.4	10926.3	21050.2	19740.9	10834.4	10538.4	24041.3	23516.3	18144.1	17463.5	19303.7	19416.9
8693	NCGC00169021-02!(2S,3S,4S,5R,6S)-6-[5,7-dihydroxy-2-(4-hydroxyphenyl)-4-oxochromen-3-yl]oxy-3,4,5-trihydroxyoxane-2-carboxylic acid	MS/MS | lib_lcmsms_pos | FooDB:Strawberry	CCMSLIB00000846803	[M+H]+	FNTJVYCFNVUBOL-ZUGPOPFOSA-N	0.00124954	1.49093	0.576208	2124.17	124501	123832	84421.7	79245.2	67996.9	68255.1	65748.6	62639.6	63126.8	63635.2	156704	151456	91433.3	86639.4	118579	116408	121398	118032	119274	117891
8891	Miquelianin	MS/MS | lib_lcmsms_pos | plant	NIST_1807914	[M+H]+	DUBCCGAQYVUYEU-ZUGPOPFOSA-N	0.00135974	1.44684	0.5329	5144.33	651800	631165	562137	551549	508267	496902	529947	514994	524794	512469	1.04616e+06	1.00955e+06	859621	848116	544536	543170	868767	821354	709420	683787
5831	Longilactone	MS/MS | lib_lcmsms_pos | plant	NIST_3082934	[M+H-3H2O]+	KBBRVTNGCNCUCX-IRLOYWMGSA-N	0.0015706	1.54241	0.625186	76.42	5497.2	5451.52	4026.04	3725.36	3547.21	3173.15	3598.18	3446.58	3777.14	3530	7287.21	6422.06	3706.45	3360.8	7993.83	7534.94	6011.48	5732.92	6722.58	6573.05
5458	Delphinidin	MS/MS | lib_lcmsms_pos | FooDB:Strawberry	RIKENPlaSMA003076	[M]+	JKHRCGUTYDNCLE-UHFFFAOYSA-O	0.00178769	1.44174	0.527809	2732.08	410209	398240	359926	347226	329554	316784	333629	325643	327947	321442	678478	648086	537983	531590	349386	346677	533204	515617	441515	421158
2535	4-Oxo-5-phenylpentanoic acid	MS/MS | lib_lcmsms_pos | plant	NIST_3164902	[M+H-H2O]+	LTNSOYZGFPWHOF-UHFFFAOYSA-N	0.00202516	1.56679	0.647809	69.24	4127.99	3597.61	2694.82	2596.96	1530.25	2067	2301.27	2353.21	2432.36	2167.28	5124.45	4948.27	2688.21	2155.21	5061.12	4779.6	3926.55	3525.48	4349.01	3972.93
9827	(7-Hydroxy-1-(4-hydroxy-3,5-dimethoxyphenyl)-3-(hydroxymethyl)-6,8-dimethoxy-1,2,3,4-tetrahydronaphthalen-2-yl)methyl pentopyranoside	MS/MS | lib_lcmsms_pos | plant	NIST_3279616	[M+Na]+	GWDZRGQRNHELQM-UHFFFAOYSA-N	0.00208231	3.41834	1.7733	73.33	3475.52	3229.68	1010.2	584.24	52.082	52.082	52.082	52.082	549.63	52.082	4005.32	3552.09	562.4	549.28	4274.13	4192.39	3337.03	2914.91	4080.65	3671.8
4575	Thr-Phe	MS/MS | lib_lcmsms_pos | plant	NIST_1640068	[M+H]+	IQHUITKNHOKGFC-IEBDPFPHSA-N	0.0022402	4.81185	2.26659	116.26	1410.02	978.03	53.074	53.074	53.074	53.074	53.074	53.074	53.074	53.074	1509.17	849.54	53.074	1062.43	2107.84	2179.83	907.83	530.74	2176.23	2157.34
3528	Cys-Val	MS/MS | lib_lcmsms_pos | plant	NIST_1631073	[M+H]+	OELDIVRKHTYFNG-NTSWFWBYSA-N	0.00232458	3.16877	1.66392	97.65	3119.59	2668.33	1340.67	505.68	503.51	29.362	1741.5	636.8	573.32	29.362	7168.05	6521.87	2356.18	2048.7	2603.53	2586.75	3010.49	2967.98	2949.5	3112.78
9352	1-Linoleoyl-sn-glycero-3-phosphorylcholine	MS/MS | lib_lcmsms_pos | FooDB:Strawberry	NIST_1943374	[M+H]+	SPJFYYJXNPEZDW-UTJQPWESSA-N	0.0025539	1.43139	0.517417	1489.13	7457.26	6634.96	5166.76	4627.95	3932.93	3860.8	4641.27	4209.19	4200.71	4350.74	9904.4	8727.41	4983.76	5130.55	7047.27	7117.53	6995.52	6349.47	7185.68	6814.73
9754	NCGC00385982-01_C27H30N2O10_	MS/MS | lib_lcmsms_pos | plant	CCMSLIB00000855668	[M+Na]+	YUCVPZILWXKQCX-UHFFFAOYSA-N	0.00264475	1.92857	0.947535	135.27	10996.4	9987.12	5300.72	5132.88	4276.66	3826.63	3970.57	3814.82	3767.65	3520.13	12571.8	11580.3	4858.3	4573.78	15065.1	14806.3	9318.33	9011.81	12206.5	11295.6
1999	Xanthosine	MS/MS | lib_lcmsms_pos | FooDB:Strawberry	NIST_1359317	[M+H-C5H8O4]+	UBORTCNDUKBEOP-UUOKFMHZSA-N	0.00275563	2.1362	1.09505	318.28	7608.66	7443.15	5742.09	5609.54	4384.8	4518.65	3378.64	3595.51	3736.89	3486.09	5309.44	4941.12	11312.6	11295	9389.47	9088.45	18520.6	17154.1	9219.57	9520.22
7966	Apimaysin	MS/MS | lib_lcmsms_pos | FooDB:Plant	NIST_3079397	[M+H-C6H10O4]+	LCQVQAZLYBJMGJ-LUSKEGLYSA-N	0.00281236	1.38781	0.472809	107.79	5140.99	5397.22	4727.89	4341.15	4072.72	3740.71	4490.29	4140.95	4309.59	4074.16	4895.83	4610.72	4848.92	4405.82	6710.66	6425.75	7866.47	7646.73	7440.67	6816.66
5167	Fonsecin	MS/MS | lib_lcmsms_pos | plant	NIST_1807554	[M+H]+	FKCYENFBFZUSDP-UHFFFAOYSA-N	0.00284287	3.38111	1.7575	67.3	2376.96	2298.57	1482.35	965.45	51.044	955.71	541.8	51.044	652.96	51.044	4480.13	4500.8	51.044	51.044	4649.63	4428.67	3789.12	3442.83	3211.96	3268.27
8885	N1,N5,N10,N14-Tetra-trans-p-coumaroylspermine	MS/MS | lib_lcmsms_pos | plant	NIST_1923156	[478.3]+	KKJYIHSXTUGJLP-BRJCPHQQSA-N	0.00297415	4.81382	2.26718	53.53	1602.64	57.972	1335.2	57.972	777.12	57.972	57.972	57.972	57.972	57.972	1684.48	847.89	57.972	57.972	2833.49	2666.01	2854.91	2935.18	3047.29	2851.44
5899	Dehydrophytosphingosine (not validated, isomer of 1679)	MS/MS | lib_lcmsms_pos | FooDB:Plant	PR310830	[M+H]+	CQKNELOTFUSOTP-UHFFFAOYSA-N	0.00297653	1.64657	0.719463	415.15	19739.4	18201.9	18491.9	16873	16187	16665	13139.1	11712.2	12175.1	11819.8	23235.5	22865.8	18751.1	17647	19000.7	19111.1	38398.9	38622	28638.9	28954.7
7028	Linocinnamarin	MS/MS | lib_lcmsms_pos | FooDB:Plant	NIST_3082849	[M+Na]+	KPYQJVYNSWDFQU-ORXIWHNOSA-N	0.00310643	1.46708	0.552949	100.21	6261.63	5788.54	4204.72	3955.95	3169.68	3050.13	3622.42	3302.09	2822.02	2137.29	6357.62	5478	4179.35	3966	7131.45	6692.99	5852.88	5119.91	5625.59	5806.67
8620	Flavine mononucleotide	MS/MS | lib_lcmsms_pos | FooDB:Strawberry	NIST_1171349	[M+H]+	FVTCRASFADXXNN-SCRDCRAPSA-N	0.00314916	1.43366	0.519703	69.51	4370.99	4289.44	3343.53	2838.39	2193.02	2399.95	2980.56	2939.49	3013.1	2731.68	5010.44	4711.03	2786.8	2502.46	5311.85	4672.42	4790.71	4370.11	5226.25	5204.97
8995	6-Deoxy-.alpha.-L-mannopyranosyl-(1->4)-.beta.-D-glucopyranosyl-(1->6)-1-O-((2.alpha.,3.beta.,5.Xi.,6.beta.,9.Xi.)-2,3,6,23-tetrahydroxy-28-oxoolean-12-en-28-yl)-.beta.-D-glucopyranose	MS/MS | lib_lcmsms_pos | FooDB:Plant	NIST_3303414	[M+H-C18H32O15]+	NNWMHSNRRWMMBI-CTLQTXLOSA-N	0.00321757	3.11938	1.64126	66.57	1597.41	1643	2392.96	1868.05	1325.19	1818.74	69.636	69.636	69.636	69.636	4759.91	4591.14	69.636	69.636	3975.8	3701.17	3679.16	3629.4	4833.66	4766.22
2260	Coniferyl alcohol	MS/MS | lib_lcmsms_pos | FooDB:Strawberry	NIST_1371478	[M+H-H2O]+	JMFRWRFFLBVWSI-NSCUHMNNSA-N	0.00334326	1.48739	0.572783	95.21	11059.6	9857.58	7748.44	7006.42	6174.38	5938.31	7077.61	6625.97	6743.53	6589.4	12910.1	12484.5	6875.57	6162.48	15054.5	13829.9	10720.1	10076.5	12019.5	11155
5457	Delphinidin	MS/MS | lib_lcmsms_pos | FooDB:Strawberry	RIKENPlaSMA003076	[M]+	JKHRCGUTYDNCLE-UHFFFAOYSA-O	0.00369692	1.22703	0.295172	6514.93	832484	806748	739769	699169	663902	655348	608705	596809	609027	590487	934192	903052	883481	849031	638542	613510	937378	900992	855819	830821
1899	3-O-Coumaroylquinic acid	MS/MS | lib_lcmsms_pos | FooDB:Strawberry	NIST_1955999	[M+H-C7H12O6]+	BMRSEYFENKXDIS-QHAYPTCMSA-N	0.00408721	2.18948	1.13059	67.98	24151.8	23533.5	18478.1	16054.3	15328.9	14688.5	13586.2	13195.5	13776.2	13897.2	49349.7	46010.1	57902.4	55173.9	14772.8	14050.5	42280.7	39410.8	22962.8	23051.6
3002	Isobutyrylphloroglucinol	MS/MS | lib_lcmsms_pos | FooDB:Strawberry	NIST_3053450	[M+H]+	BNEBXEZRBLYBCZ-UHFFFAOYSA-N	0.00413995	1.48619	0.571622	390.48	29536.2	28662.9	23637.1	21848.1	19242.4	19480.7	21533.3	21401.6	21622.7	21039.2	34290.7	31482.8	19225.9	17913.2	45482.6	44693.6	35933.1	34418.5	37642.3	37775.8
5730	Warfarin	MS/MS | lib_lcmsms_pos | plant	EQ310304	[M+H]+	QTXVAVXCBMYBJW-UHFFFAOYSA-N	0.00449719	1.2382	0.308242	76.59	5122.08	5234.17	4190.11	3980.16	3562.46	3791.32	3779.2	3238.61	3795.45	3690.69	4831.86	4385.43	4172.64	3862.62	5947.04	5579.73	5426.29	5080.11	5498.63	5219.33
5112	D-Turanose	MS/MS | lib_lcmsms_pos | plant	NIST_1541718	[M+H-3H2O]+	RULSWEULPANCDV-PIXUTMIVSA-N	0.00457769	0.865317	-0.208699	121.63	11888.2	11702.9	12706	11716.3	10990.1	11562	13170.2	12656.7	13324.5	12694	11749.5	10260.2	12912.8	12175.2	9041.58	8670.18	10203.8	9719.27	10682.1	10509.7
3278	phlormethylbutanophenone	ChemDistiller | PlantCyc	PlantCyc::CPD-19784	[M+H]+	ASABIRFQGVWRDC-UHFFFAOYSA-N	0.00465595	4.70146	2.23311	58.72	1820.25	1948.87	54.373	54.373	54.373	54.373	54.373	54.373	54.373	54.373	2787.62	2499.54	54.373	54.373	3574.7	3389.08	1568.64	1020.55	2529.46	2287.07
8892	NCGC00168861-02!(2S,3S,4S,5R,6S)-6-[2-(3,4-dihydroxyphenyl)-5,7-dihydroxy-4-oxochromen-3-yl]oxy-3,4,5-trihydroxyoxane-2-carboxylic acid	MS/MS | lib_lcmsms_pos | plant	CCMSLIB00000845058	[M+H]+	DUBCCGAQYVUYEU-ZUGPOPFOSA-N	0.00482401	1.23502	0.30454	5190.87	571849	558987	491145	473025	443277	439858	410317	401108	406572	397746	612357	597765	605769	584501	420475	407416	652766	622780	590939	578794
7463	N6-Succinyladenosine; AIF; CE10; MS2Dec	MS/MS | lib_lcmsms_pos | plant	MoNA018561	[M+H]+	VKGZCEJTCKHMRL-MDBUBQOGSA-N	0.00483168	1.7078	0.772138	124.29	11916.2	11505.4	10816.1	9890.77	8099.87	8077.81	5389.4	5131	5544.56	5043.23	10089.7	9445.56	7594.94	7661.77	18263.1	17319.6	19937.5	18123.6	15352.6	15250.8
9743	3-(4-((1,3-Dihydroxy-1-(4-hydroxy-3-methoxyphenyl)propan-2-yl)oxy)-3-methoxyphenyl)propyl hexopyranoside	MS/MS | lib_lcmsms_pos | plant	NIST_3171281	[M+Na]+	NFUHNVZGHNEYRG-UHFFFAOYSA-N	0.00490355	0.463705	-1.10872	144.11	3022.45	2559.06	3937.88	3711.57	3302.5	3656.77	3805.12	3910.13	3525.14	3485.49	3730.1	3696.29	512.63	14.894	3215.92	2970.76	14.894	14.894	1404.37	616.04
7199	[(2S,3R,4S,5S,6R)-3,4,5-trihydroxy-6-(hydroxymethyl)oxan-2-yl] (2E,6E)-8-hydroxy-2,6-dimethylocta-2,6-dienoate	MS/MS | lib_lcmsms_pos | plant	VF-NPL-QTOF005848	[M+Na]+	QZIOPOIUZGGXKI-KOYXEPTDSA-N	0.00498587	1.89896	0.925206	56.14	2909.67	3007.27	570.87	986.02	512.22	51.222	2267.72	1954.08	2018.69	1597.7	2195.41	2234.84	1682.68	1899.21	4351.04	4274.89	3747.21	3470.08	3132.98	3158.45
11319	Procyanidin C1	MS/MS | lib_lcmsms_pos | FooDB:Strawberry	NIST_1112151	[M+H]+	MOJZMWJRUKIQGL-CGFIDGTHSA-N	0.00536782	3.25209	1.70137	811.37	95.728	95.728	1134.49	1053.78	95.728	957.28	5099.02	4813.55	4926.1	3701.33	14918.9	13550.1	5503.22	4698.66	8774.69	8309.41	5148.94	4324.89	3165.66	3062.9
10441	tiliroside	MS/MS | lib_lcmsms_pos | FooDB:Plant	VF-NPL-QEHF015154	[M+K]+	DVGGLGXQSFURLP-VWMSDXGPSA-N	0.00548326	0.920037	-0.120237	685.94	54981.3	52951.5	59666.5	56035.5	58429	56830.5	59078.2	56230.8	58226.3	54998.2	48696.4	46369.1	58207.7	54492.6	50806	47552.2	56411.9	53053.8	53628.2	52836.6
2682	Caffeic acid	MS/MS | lib_lcmsms_pos | FooDB:Strawberry	NIST_1350747	[M+H]+	QAIPRVGONGVQAS-DUXPYHPUSA-N	0.00565265	2.42765	1.27956	80.92	3580.48	3238.86	3829.88	3239.56	3029.94	3107.28	535.21	53.521	53.521	53.521	8197.16	7028.47	7138.79	6515.37	1148.64	1137.32	5455.27	5243.22	4338.12	4102.89
5048	Kaempferol	MS/MS | lib_lcmsms_pos | FooDB:Strawberry	RIKENPlaSMA002180	[M+H]+	IYRMWMYZSQPJKC-UHFFFAOYSA-N	0.00566025	1.88075	0.911311	349.53	24860.3	24264	18564.4	17509	16804.8	16999.8	14146.9	14666.1	15391	14948.8	43799.3	42841.8	10066.7	9622.47	47455.8	46612.3	36800.2	35325.2	30533.9	32008
2239	umbelliferone	ChemDistiller | PlantCyc	PlantCyc::CPD-8186	[M+H]+	ORHBXUUXSCNDEV-UHFFFAOYSA-N	0.00566919	2.14251	1.0993	214.63	9452.42	8678.06	13696.4	11666.2	11408.5	11179.2	4952.17	4452.56	5087.05	4775.35	21940.2	19593.5	29052.7	27670.7	5461.25	5019.14	23975.6	22391	13884	13870.2
8155	(3E)-4-(1,2,4-Trihydroxy-2,6,6-trimethylcyclohexyl)but-3-en-2-yl hexopyranoside	MS/MS | lib_lcmsms_pos | plant	NIST_3161705	[M+Na]+	XZRJEYQBLXDNNU-AATRIKPKSA-N	0.00622653	0.410237	-1.28547	81.98	2013.64	1950.95	4393.9	4247.51	4330.99	4091.53	5101.89	5059.88	5118.26	4554.83	5088.36	4379.84	51.593	51.593	3309.63	3211.93	51.593	51.593	515.93	51.593
8054	NCGC00180835-03!2-[5-[2-[2-[5-(2-hydroxybutyl)oxolan-2-yl]propanoyloxy]propyl]oxolan-2-yl]propanoic acid	MS/MS | lib_lcmsms_pos | plant	CCMSLIB00000846081	[M+Na]+	JZCRGJSEBZCNAR-UHFFFAOYSA-N	0.00622713	3.2267	1.69006	85.37	3246.21	2765.63	984.74	996.32	53.875	53.875	53.875	53.875	53.875	53.875	1070.35	1101.77	4062.73	3764.92	1688.44	654.08	4432.84	4160.81	3061.54	2836.22
4583	Adenosine	MS/MS | lib_lcmsms_pos | FooDB:Strawberry	NIST_1344847	[M+H]+	OIRDTQYFTABQOQ-CRKDRTNXSA-N	0.00644628	1.48976	0.575081	10524.9	69305.8	65939.5	54037.5	49960.8	43747.7	43671.1	29601.7	27712.7	28562.9	28559.7	54715.3	51311.4	59742.4	55093.8	95342.6	90872.7	57375.1	54104.3	69984.9	68590.1
2591	9,10-Dihydrojasmonic acid	MS/MS | lib_lcmsms_pos | FooDB:Plant	NIST_1688888	[M+H-2H2O]+	PQEYTAGBXNEUQL-NXEZZACHSA-N	0.00667274	1.43816	0.524228	93.53	7936.47	7188.75	7846.56	7610.48	7531.01	6934.8	5306.59	4785.08	4851.53	4802.26	10986.6	10212.3	4629.38	4826.48	10585.1	9963.65	9749.27	10017.3	11356.2	10857.4
5108	(-)-Gallocatechin 3-gallate	MS/MS | lib_lcmsms_pos | FooDB:Plant	NIST_1450243	[M+H-C7H6O5]+	WMBWREPUVVBILR-NQIIRXRSSA-N	0.00684074	27.7531	4.79457	1743.02	53.704	53.704	53.704	53.704	53.704	53.704	53.704	53.704	53.704	53.704	3430.91	3239.94	2341.26	2227.8	1301.55	53.704	1664.89	537.04	53.704	53.704
7648	Brucine	MS/MS | lib_lcmsms_pos | plant	NA002556	[M+H]+	RRKTZKIUPZVBMF-PLNGPGDESA-N	0.00766537	4.82362	2.27012	44.36	524.01	2084.42	50.949	50.949	50.949	50.949	50.949	50.949	50.949	50.949	3057.18	2746.83	50.949	50.949	2036.46	1766.67	1458.48	969.32	1089.8	1321.51
1133	Nicotinamide	MS/MS | lib_lcmsms_pos | FooDB:Strawberry	FiehnHILIC000609	[M+H]+	DFPAKSUCGFBDDF-UHFFFAOYSA-N	0.00824056	1.48504	0.5705	268.49	78440.5	75387.9	46475.5	41631.5	36776.9	36426	37977.9	33622.5	36880.2	33846.7	57180.7	51731.9	55278	51918.9	75894.8	73434.8	63681.4	59682.6	94733.2	95817.4
9250	(2R,3S,4S,5S,6R)-2-[4-[7-hydroxy-3-(hydroxymethyl)-5-(3-hydroxypropyl)-2,3-dihydro-1-benzofuran-2-yl]-2-methoxyphenoxy]-6-methyloxane-3,4,5-triol	MS/MS | lib_lcmsms_pos | plant	VF-NPL-QTOF000832	[M+NH4]+	PHHIEOZUONPPQY-AIVHQYJCSA-N	0.00851495	1.49488	0.580028	74.08	4937.88	4509.54	3705.33	3135.04	2926.15	2644.72	3387.39	3354.57	3245.17	2758.43	6281.34	6117.18	2727.54	2427.01	7157.98	6692.45	4878.96	4622.92	5545.27	5278.45
8519	Kaempferol 3-ss-D-galactoside	MS/MS | lib_lcmsms_pos | FooDB:Strawberry	NIST_3069909	[M+H]+	JPUKWEQWGBDDQB-DTGCRPNFSA-N	0.008895	1.61811	0.694312	232.13	5863.59	5404.3	4611.53	4123.18	3717.87	3771.19	4207.16	4010.07	4049.92	3934.27	11794.7	11311	4880.46	4728.65	7719.1	7424.35	6126.67	6039.11	5392.76	5283.56
7570	Ginkgolide A	MS/MS | lib_lcmsms_pos | FooDB:Plant	NIST_1810469	[M+H-H2O]+	FPUXKXIZEIDQKW-TVPHMGRTSA-N	0.00912745	1.68418	0.752049	52.25	3462.73	2986.05	3224.34	2828.63	2522.3	2398.44	1390.41	1062.48	50.959	50.959	3767.7	3030.85	4124.53	4228.32	3326.32	3056.28	3722.06	3369.8	2329.92	2689.65
10899	Gingerglycolipid A	MS/MS | lib_lcmsms_pos | FooDB:Plant	NIST_1952909	[M+Na]+	MPSGDHOYFIUPSO-MDAKJLGTSA-N	0.00926232	1.6683	0.738375	1440.81	151820	147446	45784.6	43183.2	32005.6	32136.3	80420.5	80327.7	68148.5	63620.5	164849	155623	87500.6	85303	153304	144925	93570.8	94615.5	131685	131327
4754	(10E,15Z)-9,12,13-Trihydroxyoctadeca-10,15-dienoic acid	MS/MS | lib_lcmsms_pos | FooDB:Plant	NIST_1869606	[M+H-3H2O]+	MKYUCBXUUSZMQB-MKZMYESJSA-N	0.00926279	1.46151	0.547456	298.31	255309	242049	291396	257322	257820	241469	164658	160547	160388	155215	399964	375347	153288	146666	349401	335549	340827	328835	384796	380434
5472	Delphinidin 3-galactoside cation	MS/MS | lib_lcmsms_pos | FooDB:Strawberry	NIST_1454945	[303.1]+	XENHPQQLDPAYIJ-YXRUOGEQSA-O	0.0094323	1.34198	0.424364	444.49	14170.7	13303.8	13331.4	12189.3	10663	10908.8	11935.4	11355.6	10909.6	10601.7	12647.1	12020	23632.3	22579.2	14834.7	14859.6	15201.8	14111.4	14913.5	15391.7
7070	NCGC00385117-01_C15H18O9_(2E)-3-[3-(beta-D-Glucopyranosyloxy)-4-hydroxyphenyl]acrylic acid	MS/MS | lib_lcmsms_pos | FooDB:Plant	CCMSLIB00000852845	[M+Na]+	QOPSZFXPZWQLOG-VHCZEJTMSA-N	0.0101153	15.4778	3.95212	201.05	51.408	51.408	51.408	51.408	51.408	51.408	582.04	583.58	514.08	523.44	3029.67	2880.76	10138.8	9737.71	2042.33	1823.99	4806.9	4310.78	51.408	51.408
8096	NCGC00386009-01_C19H30O9_(3E)-4-(8-Hydroxy-1,5-dimethyl-3-oxo-6-oxabicyclo[3.2.1]oct-8-yl)-3-buten-2-yl beta-D-glucopyranoside	MS/MS | lib_lcmsms_pos | plant	CCMSLIB00000853649	[M+Na]+	AQDQRSAVDNFBEA-HKMVGJDTSA-N	0.0103429	1.46235	0.548292	73.63	5409.45	5647.29	3716.19	3527.41	2477.94	2732.58	3373.5	3459.86	1329.43	2072.36	4348.22	4375.19	3365.23	3345.44	6279.78	6072.64	5373.27	5032.02	5579.74	5577.05
2912	2D-5-<i>O</i>-methyl-2,3,5/4,6-pentahydroxycyclohexanone	ChemDistiller | PlantCyc	PlantCyc::PENTAHYDROXYCYCLOHEXANONE	[M+H]+	VKPFEZAOAAZDPP-QCNSFQOVSA-N	0.0108414	1.2459	0.317186	76.25	3368.65	3401.91	3093.52	2665.05	2809.63	2447.35	2989.34	2608.66	2893.41	2780.6	3412.51	2943.94	4549.56	4556.71	2842.93	2649.68	3882.85	4125.7	3341.04	3898.54
10071	NCGC00381165-01!5,7-dihydroxy-2-phenyl-6,8-bis[3,4,5-trihydroxy-6-(hydroxymethyl)oxan-2-yl]chromen-4-one	MS/MS | lib_lcmsms_pos | plant	CCMSLIB00000847989	[M+Na]+	SLVXPCHHHTVCHF-UHFFFAOYSA-N	0.0109065	1.68625	0.753821	200.99	18464.5	18219.1	11501.8	11124.4	9638.31	9804.08	9025.62	8989.89	9357.58	8924.41	11736	11200.4	19666	18215.4	11679.6	11610.4	29117.4	28282.1	26059.6	26435.7
2579	Hesperetin	MS/MS | lib_lcmsms_pos | FooDB:Strawberry	NIST_1354781	[M+H-C6H6O3]+	AIONOLUJZLIMTK-AWEZNQCLSA-N	0.0109776	3.98284	1.9938	59.46	885.17	1045.37	3433.75	3202.75	2910.81	2980.69	53.348	553.53	937.97	533.48	14864.4	13494.7	9405.35	9120.07	2500.17	2124.24	5324.47	4989.41	2270.35	1770.58
9598	(2R,3R,4S,5S,6R)-2-[3-[2-(4-hydroxy-3-methoxyphenyl)-3-(hydroxymethyl)-7-methoxy-2,3-dihydro-1-benzofuran-5-yl]propoxy]-6-(hydroxymethyl)oxane-3,4,5-triol	MS/MS | lib_lcmsms_pos | plant	VF-NPL-QTOF000668	[M+Na]+	DVWKMCPPEMUHBE-RAGYRXETSA-N	0.0113097	1.5959	0.674366	187.57	14647.7	13488.3	8254.36	8038.73	7180.28	6432.53	9896.78	8984.27	8748.11	8408.74	16885	16193.4	6786.19	6107.26	23003.9	21734.8	14589.2	13822.9	15639.9	15378.7
5168	(-)-Epicatechin	MS/MS | lib_lcmsms_pos | FooDB:Strawberry	FIO00070	[M+H]+	PFTAWBLQPZVEMU-UKRRQHHQSA-N	0.0117285	2.12861	1.08991	4875.99	12952.8	12582.1	12181.2	12108.7	9994.62	10770.3	21905.3	22557	21720.8	22027.6	56369.8	52404.5	51584	49532.7	34875.3	33736.3	17483.9	16760.5	12858.5	12419.2
6732	5S,12R-Dihydroxy-6Z,8E,10E,14Z-eicosatetraene-1,20-dioic acid	MS/MS | lib_lcmsms_pos | plant	NIST_1135295	[M+H-H2O]+	SXWGPVJGNOLNHT-XBAHGSDGSA-N	0.0125384	1.80225	0.849802	42.97	16736.7	14840.7	12844	10610.4	8874.54	8158.8	7233.93	6645.79	6424.23	5492.64	23027.6	21140.1	6577.3	6165.9	28823.1	27537.9	15920.5	15874.4	15365.6	15939.3
1666	(3Z,6Z)-nonadienal	ChemDistiller | PlantCyc	PlantCyc::CPD-8685	[M+H]+	FIDBXHOCOXRPRO-CWWKMNTPSA-N	0.0136015	1.68766	0.755024	148.28	5093.71	5058.09	3605.93	3142.72	2926.46	2186.52	2860.77	2602.14	2587.26	2423.32	4177.44	3745.9	2743.83	2596.11	8971.33	8839.02	5708.59	5665.34	6302.14	6077.15
3118	<i>N<sup>2</sup></i>-acetyl-L-Lysine	ChemDistiller | PlantCyc	PlantCyc::N-ACETYL-L-LYSINE	[M+H]+	UIQZVXSKIBLUPN-QMMMGPOBSA-N	0.0147825	1.34161	0.423968	418.17	6028.6	6209.17	4914.64	4615.95	4166.4	4384.41	3836.56	3305.22	3950.41	3325.78	7602.13	6341.61	3947.82	3792.74	7595.6	7016.87	5008.83	4940.97	6745.19	7028.13
5485	5-[(1S,2R,4aR)-1,2,4a,5-Tetramethyl-7-oxo-3,4,8,8a-tetrahydro-2H-naphthalen-1-yl]-3-methylpentanoic acid	MS/MS | lib_lcmsms_pos | plant	NIST_3158681	[M+H-H2O]+	RNWHJFUXZQBBLK-VWJHISDNSA-N	0.0150826	5.98393	2.58109	59.14	1552.31	1481.85	53.265	53.265	53.265	53.265	53.265	53.265	53.265	53.265	3439.98	3563.13	53.265	53.265	4040.95	4069.48	53.265	53.265	2762.34	2617.14
10079	5-Hydroxy-2-(4-hydroxyphenyl)-4-oxo-3,4-dihydro-2H-chromen-7-yl 2-O-(6-deoxy-.alpha.-L-mannopyranosyl)hexopyranoside	MS/MS | lib_lcmsms_pos | FooDB:Plant	NIST_1806908	[M+Na]+	DFPMSGMNTNDNHN-GORRZPGTSA-N	0.0157825	2.65828	1.41049	749.94	34052.1	33314.2	44216.3	41658.3	37401.5	38404.1	37434.7	36117.1	36241.2	35004.7	124892	117142	203146	195461	25648.6	25559.6	113966	108651	40302.7	39012.9
9368	1-Oleoyl-sn-glycero-3-phosphocholine	MS/MS | lib_lcmsms_pos | FooDB:Plant	NIST_1149842	[M+H]+	YAMUFBLWGFFICM-PTGWMXDISA-N	0.0162595	14.6445	3.87229	1011.28	51.906	51.906	51.906	51.906	51.906	51.906	51.906	51.906	51.906	51.906	1016.27	519.06	51.906	51.906	51.906	51.906	2015.32	1950.85	945.93	946.34
8848	6''-O-Acetylgenistin	MS/MS | lib_lcmsms_pos | FooDB:Plant	NIST_1118639	[M+H]+	DXWGBJJLEDQBKS-LDBVRRDLSA-N	0.017442	11.6053	3.53672	2175.81	50.636	50.636	50.636	50.636	50.636	50.636	50.636	50.636	50.636	50.636	50.636	577.29	50.636	50.636	1572.48	1504.54	506.36	50.636	909.56	603.7
1129	(-)-Catechin	MS/MS | lib_lcmsms_pos | FooDB:Strawberry	NIST_1310316	[M+H-C8H8O4]+	PFTAWBLQPZVEMU-HIFRSBDPSA-N	0.0177879	2.31125	1.20867	158.68	4359.31	3855.86	4838.21	4510.66	4223.49	4016.89	5114.3	4681.43	4911.73	4628.85	21466.3	20115.7	14262.1	13466.4	6793.05	6858.78	6647.78	6747.49	4176.05	3797.95
7704	Rhodamine B cation	MS/MS | lib_lcmsms_pos | plant	NIST_1558370	[Cat-C3H8]+	CVAVMIODJQHEEH-UHFFFAOYSA-O	0.0181499	12.7821	3.67605	29.62	52.247	52.247	52.247	52.247	52.247	52.247	52.247	52.247	52.247	52.247	1069.79	2026.6	52.247	52.247	1396.61	842.44	52.247	52.247	525.42	608.41
1088	4-Hydroxyphenethyl alcohol	MS/MS | lib_lcmsms_pos | FooDB:Strawberry	NIST_1074450	[M+H-H2O]+	YCCILVSKPBXVIP-UHFFFAOYSA-N	0.0196017	2.91604	1.54401	78.29	52.425	52.425	5368.31	4766.7	4623.5	4617.17	3351.67	3263.92	3626.32	3187.21	8941.31	7986.27	22186.7	21406.2	7523.5	7362.71	8838.79	8346.39	1210.09	2164.05
6856	1-Monolinolenin	MS/MS | lib_lcmsms_pos | FooDB:Strawberry	NIST_3173290	[M+H]+	GGJRAQULURVTAJ-PDBXOOCHSA-N	0.020164	1.43124	0.517267	127.97	17272.1	16726.9	11920.5	10287.1	9372.95	9612.2	9324.14	8687.96	8821.65	8171.78	18780.2	17261.6	7260.41	6680.29	17721.4	17148	16374.5	16820.6	19878.7	19793.2
6884	5-amino-6-(5-phospho-D-ribitylamino)uracil	ChemDistiller | PlantCyc	PlantCyc::CPD-1086	[M+H]+	RQRINYISXYAZKL-IWGUZYHVSA-L	0.0205434	2.03696	1.02642	81.39	2366.6	2583.05	2565.69	2345.3	2324.19	2234.76	530.55	523.72	780.11	941.25	4554.73	4102.68	5873.74	5935.15	971.21	52.372	4289.1	3877.92	2327.68	3041.39
9330	1-Palmitoyl-sn-glycero-3-phosphocholine	MS/MS | lib_lcmsms_pos | FooDB:Strawberry	NIST_1391065	[M+Na]+	ASWBNKHCZGQVJV-HSZRJFAPSA-N	0.0210915	1.42599	0.511965	739.68	4295.05	4113.48	2772.83	2802.97	1856.75	2164.41	3256.31	3298.5	3391.12	3134.32	7145.27	6826.76	3561.15	3439.8	4529.07	4654.81	3571.8	3399.41	3602.11	3597.8
5660	AVOCADYNE	MS/MS | lib_lcmsms_pos | FooDB:Plant	VF-NPL-QEHF002986	[M+Na]+	OHLQBKZXSJYBMK-UHFFFAOYSA-N	0.0214066	1.62962	0.704535	78.78	3876.12	3451.12	3666.46	3126.75	3465.93	2809.48	3041.76	2841.73	2996.22	2710.66	7357.19	7157.59	1388.17	1262.62	6577.47	6232.86	4217.02	4645.1	6690.57	6596.79
7643	Eleutheroside B	MS/MS | lib_lcmsms_pos | FooDB:Plant	NIST_1566886	[M+Na]+	QJVXKWHHAMZTBY-CZZVJJMOSA-N	0.0232938	0.829975	-0.26886	87.82	6221.31	6496.39	6374.45	5932.15	5836.97	5639.64	7070.26	6585.06	6522.32	6389.87	7191.88	6945.42	4578.06	4380.1	5675.16	5791.61	3867.41	3473.01	5212.91	5229.66
9867	Procyanidin B2	MS/MS | lib_lcmsms_pos | FooDB:Strawberry	NIST_1112121	[M+H]+	XFZJEEAOWLFHDH-NFJBMHMQSA-N	0.0243485	3.40117	1.76603	290.53	51.227	51.227	563.5	512.27	51.227	51.227	1589.84	1713.49	1776.68	1572.88	6174.66	5933.41	3678.07	3450.6	2724.83	2589.79	1416.17	913.46	51.227	51.227
8255	Pelargonidin-3-O-glucoside	MS/MS | lib_lcmsms_pos | FooDB:Strawberry	RIKENPlaSMA002675	[M]+	ABVCUBUIXWJYSE-GQUPQBGVSA-O	0.0244582	0.0720059	-3.79574	10657	7919.89	4177.79	3734.34	165.174	2693.43	165.174	2101.07	165.174	1651.74	165.174	165.174	165.174	165.174	165.174	165.174	165.174	165.174	165.174	165.174	165.174
9144	1843U89	ChemDistiller | PlantCyc	PlantCyc::CPD-12510	[M+H]+	BRVFNEZMTRVUGW-QFIPXVFZSA-L	0.0261929	2.83858	1.50517	111.56	2723.95	2816.97	5850.52	5818.58	5281.33	5586.62	3101.8	2911.31	2768.89	2614.3	24687.6	22946.1	17447.8	17250.3	3309.11	3433.1	8664.77	8233.23	3160.32	2918.54
7677	7-Hydroxymitragynine	MS/MS | lib_lcmsms_pos | plant	NIST_1270469	[M+H-H2O]+	RYENLSMHLCNXJT-CYXFISRXSA-N	0.0272697	0.5671	-0.818326	44.09	1348.69	522.73	4175.72	3620.98	3631.79	3322.12	2990.02	2736.2	2530.73	2458.35	3266.15	3134.97	522.64	504.81	2419.5	2189.15	1144.75	928.66	846.04	546.32
1971	Hydrocinnamic acid	MS/MS | lib_lcmsms_pos | FooDB:Strawberry	NIST_1048918	[M+H]+	XMIIGOLPHOKFCH-UHFFFAOYSA-N	0.0288584	16.1527	4.01371	169.04	51.817	51.817	51.817	51.817	51.817	51.817	51.817	51.817	51.817	51.817	2479.25	2009.14	563.15	51.817	1663.6	1395.63	51.817	51.817	51.817	51.817
5640	N-(1H-Indol-3-ylacetyl)methionine	MS/MS | lib_lcmsms_pos | FooDB:Strawberry	NIST_3377725	[M+H]+	YPMYDSHISNOZST-UHFFFAOYSA-N	0.029251	2.13921	1.09708	71.83	4275.19	4558.01	3357.14	3081.37	2804.89	2868.14	2590.12	2213.45	1823.75	1420.3	2941.63	2917.27	12619.5	12245.4	2310.91	2393.44	8740.25	8277.81	4972.65	4601.89
9624	3-(4-((1,3-Dihydroxy-1-(4-hydroxy-3-methoxyphenyl)propan-2-yl)oxy)-3-methoxyphenyl)propyl 6-deoxy-.alpha.-L-mannopyranoside	MS/MS | lib_lcmsms_pos | plant	NIST_1945334	[M+Na]+	HZGGHVGIXDRDDH-GQEDLCMVSA-N	0.0295689	1.18502	0.244917	3535.17	397194	391689	354476	331819	318388	313844	351519	332645	341449	331922	486087	457356	303380	293423	493089	482148	362028	350367	442954	435212
2242	Caffeic acid	MS/MS | lib_lcmsms_pos | FooDB:Strawberry	NIST_1350755	[M+H-H2O]+	QAIPRVGONGVQAS-DUXPYHPUSA-N	0.0315329	4.73319	2.24281	99.97	1328.47	949.46	1491.97	1490.1	1041.35	1351.19	13.309	13.309	13.309	13.309	6533.82	5692.36	9036.93	8547.52	13.309	13.309	3152.38	2471.77	998.19	13.309
9419	Gentianose	MS/MS | lib_lcmsms_pos | FooDB:Strawberry	NIST_1537214	[M+Na]+	MUPFEKGTMRGPLJ-WSCXOGSTSA-N	0.0319852	1.65669	0.7283	81.37	4813.89	4637.47	3793.94	3200.58	3308.29	3211.77	674.26	629.7	62.97	62.97	4733.91	4228.48	5031.29	4854.71	4767.51	4922.77	2748.06	2595.52	3161.18	3372.81
1996	Gallic acid	MS/MS | lib_lcmsms_pos | FooDB:Strawberry	NIST_1340510	[M+H-H2O]+	LNTHITQWFMADLM-UHFFFAOYSA-N	0.0327056	1.80405	0.851239	347.82	4980.14	4512.16	4413.91	3820.49	3680.25	3963.57	6771.47	6219.99	7073.67	6195.78	20024.5	17574.4	8188.72	7745.05	5216.82	5211.03	8264.36	7766.02	6409.46	6745.3
9285	1-Alaninechlamydocin_130134	MS/MS | lib_lcmsms_pos | plant	CCMSLIB00000478539	[M+H]+	QMNUPNOLDLHVTB-IWDBHXEASA-N	0.0335109	1.40713	0.492754	94.4	4904.72	4534.84	5209.19	4718.33	4603.36	4213.11	3276.3	3038.65	2951.29	2649.01	8354.1	7661.08	2570.05	2343.94	6246.99	6438.75	5394.14	4816.53	6587.15	6011.42
9104	1-Palmitoyl-sn-glycero-3-phosphocholine	MS/MS | lib_lcmsms_pos | FooDB:Strawberry	NIST_1390999	[M+H]+	ASWBNKHCZGQVJV-HSZRJFAPSA-N	0.0336286	1.3548	0.438081	1845.05	14259.7	13250.6	9664.21	8519.67	7413.88	7371.08	9951.01	10013	9570.39	9470.42	20880.6	20283.3	9174.93	9099.08	13186.3	13140.4	10464.2	10667.3	13990.8	13894.1
8415	7-hydroxy-2-[4-[(2S,3R,4S,5S,6R)-3,4,5-trihydroxy-6-(hydroxymethyl)oxan-2-yl]oxyphenyl]-2,3-dihydrochromen-4-one	MS/MS | lib_lcmsms_pos | plant	VF-NPL-QTOF005019	[M+Na]+	DEMKZLAVQYISIA-UZQFATADSA-N	0.0344635	2.35719	1.23707	280.92	4635.92	4252.58	10248.2	9704.79	9220.16	9710.35	2798.86	2775.17	2953.36	2734.36	31955	31734.7	10702.8	10450.7	6408.86	6416.54	14615.6	14100.5	6385.47	6383.49
8717	Delphinidin 3-galactoside cation	MS/MS | lib_lcmsms_pos | FooDB:Strawberry	NIST_1454933	[Cat]+	XENHPQQLDPAYIJ-YXRUOGEQSA-O	0.0366821	1.63844	0.71232	359.01	11898.2	11829	11915.4	11124.5	9939.84	10091.6	9961.26	9585.23	9955.14	9355.67	24692.1	23176	30893.2	28730.5	9631.11	9377.88	14283.8	13988.6	9201.31	9135.98
8101	.alpha.-Tocotrienol	MS/MS | lib_lcmsms_pos | FooDB:Strawberry	NIST_1643644	[M+H]+	RZFHLOLGZPDCHJ-KTWAZNHYSA-N	0.0392405	0.473669	-1.07805	95.85	684.1	1320.71	4598.72	4374.04	4370.53	4303.74	2806.16	2987.35	2935.59	2961.97	4371.13	4218.74	50.691	50.691	2999.46	2952.68	50.691	50.691	50.691	50.691
7239	1-Naphthaleneacetamide	MS/MS | lib_lcmsms_pos | plant	NIST_1531750	[2M+H]+	XFNJVKMNNVCYEK-UHFFFAOYSA-N	0.0401929	1.555	0.636916	84.23	3305.52	3069.86	1994.92	1584.33	543.21	1487.47	1877.42	1948.68	2076.46	2250.84	3044.49	2905.39	1062.92	1500.91	5437.91	5185.62	3186.53	3099.95	2982.53	2909.48
4933	Aspartylphenylalanine; AIF; CE10; MS2Dec	MS/MS | lib_lcmsms_pos | plant	MoNA018594	[M+H]+	YZQCXOFQZKCETR-UWVGGRQHSA-N	0.0412021	7.39574	2.8867	68.99	50.525	50.525	50.525	50.525	50.525	50.525	50.525	50.525	50.525	50.525	50.525	50.525	50.525	50.525	905.87	998.22	50.525	50.525	602.06	927.4
5019	N-glucosylnicotinate	ChemDistiller | PlantCyc	PlantCyc::CPD-446	[M+H]+	CRXJVFIHZPTDKA-KAMPLNKDSA-N	0.0421014	1.51632	0.600578	129.09	3791.52	3920.28	2613.22	2395.81	1306.97	1631.68	1725.24	1823.67	1727.78	1942.46	1544.24	1434.03	2924.82	2810.02	4907.92	4744.16	2924.39	3163.58	5012.26	5226
2191	4-Aminoantipyrine	MS/MS | lib_lcmsms_pos | plant	NIST_1268864	[M+H-CH3NO]+	RLFWWDJHLFCNIJ-UHFFFAOYSA-N	0.0425514	2.97112	1.57101	47.43	2286.05	2494.49	677.27	52.678	52.678	52.678	3193.44	2594.14	3396.55	2803.26	14242.3	13345.2	3551.49	3275.43	2800.73	2794.44	4065.61	3765.57	2313.85	2146.64
4747	Chenodeoxycholic acid	MS/MS | lib_lcmsms_pos | plant	NIST_1346550	[275.2]+	RUDATBOHQWOJDD-BSWAIDMHSA-N	0.042952	1.43969	0.525763	101.46	9900.4	8932.39	11543.7	9844.86	9623.93	9641.51	7926.07	7949.95	7848.14	7910.39	20275.7	18747.2	5067.75	4860.7	15847.2	15151.6	10271.6	10138.2	15645.9	15181
1132	Nicotinamide	MS/MS | lib_lcmsms_pos | FooDB:Strawberry	FiehnHILIC000609	[M+H]+	DFPAKSUCGFBDDF-UHFFFAOYSA-N	0.0430994	1.21976	0.286602	504.43	172246	163976	125484	112759	107838	104941	114105	102521	113377	104363	116971	105573	160653	149546	144338	136169	146153	137304	199113	194254
7937	4-(.beta.-D-Glucopyranosyloxy)pentan-2-yl (2E)-3-(4-hydroxyphenyl)prop-2-enoate	MS/MS | lib_lcmsms_pos | plant	NIST_3017610	[M+H]+	RMFDCHYDPYVNFA-AKVWERCLSA-N	0.0436677	1.42899	0.514998	99.71	8284.61	8582.51	5191.56	4820.54	4248.12	4404.28	2426.13	2427.71	2277.32	2040.14	5080.59	4972.18	7815.32	7119.8	4838.39	4529.56	7174.4	7249.72	7763.36	7336.82
5415	rhodioloside	MS/MS | lib_lcmsms_pos | FooDB:Plant	VF-NPL-QTOF009518	[M+H]+	ILRCGYURZSFMEG-RKQHYHRCSA-N	0.043868	1.09315	0.128492	109.46	8273.82	8029.8	7484.24	6470.74	6031.8	6311.01	7225.07	6076.1	6704.8	6479.77	8027.96	7132.9	8338.81	8067.66	7583.97	7369.05	7354.02	6984.05	7176.83	7487.42
8715	Quercetin 3-glucoside	MS/MS | lib_lcmsms_pos | FooDB:Strawberry	NIST_3175144	[M+H]+	OVSQVDMCBVZWGM-QSOFNFLRSA-N	0.0442875	1.39962	0.48504	126.76	10472	10231.3	9203.48	8508.35	8032.12	7708.6	6188.51	6557.41	6399.33	5963.6	19069.2	18536.7	10702	9943.69	8869.91	8441.96	9609.43	8669.5	8433.5	8664.95
7833	Euscaphic acid	MS/MS | lib_lcmsms_pos | FooDB:Plant	NIST_3095347	[M+H-CH6O4]+	OXVUXGFZHDKYLS-YFIQRXMRSA-N	0.0456476	0.677467	-0.561778	141.17	4217.81	4413.16	9013.1	9128.59	8856.4	8702.66	6201.54	6265.34	6025.1	6214.55	8917.22	8513.23	3056.82	2870.4	6441.12	6434.53	1592.7	2529.9	3125.28	3289.92
8808	Euscaphic acid	MS/MS | lib_lcmsms_pos | FooDB:Plant	NIST_3095290	[M+H-H2O]+	OXVUXGFZHDKYLS-YFIQRXMRSA-N	0.0460434	0.67357	-0.570101	201.54	4681.31	4644.59	10909.9	10438	10312.4	10443.5	7091.18	7363.54	6908.79	7141.17	10152.1	9952.09	3540.05	3326.06	7240.89	7360.3	2478.6	2557.08	3652.27	3581.9
7082	Sucrose	MS/MS | lib_lcmsms_pos | FooDB:Strawberry	NIST_1069679	[M+Na]+	CZMRCDWAGMRECN-UGDNZRGBSA-N	0.0471081	0.884027	-0.177838	211.28	13658.5	13010.6	14637.2	13651.4	14802.1	13975.3	12976.5	12278.6	12940.3	12153.8	14483.8	12574.5	15030.3	12367.9	12925.3	12236.9	10082	9586.25	9910.77	9336.51
9327	1-Palmitoyl-sn-glycero-3-phosphocholine	MS/MS | lib_lcmsms_pos | FooDB:Strawberry	NIST_1391065	[M+Na]+	ASWBNKHCZGQVJV-HSZRJFAPSA-N	0.0477837	1.88676	0.915909	467.38	3090.96	2857.89	1073.34	564.06	52.562	52.562	1899.83	1509.99	643.1	997.44	4580.91	4411.36	556.39	1081.06	2463.64	2815.3	1963.4	1557.42	2445.07	2166.01
9869	Procyanidin B2	MS/MS | lib_lcmsms_pos | FooDB:Strawberry	NIST_1112122	[M+H]+	XFZJEEAOWLFHDH-NFJBMHMQSA-N	0.0497058	1.6281	0.703192	1665.93	4484.74	4227.52	5625.73	5129.99	5143.21	4956.29	6932.54	6877.93	7101.3	6546.57	18635.4	16735.4	6761.93	6420.01	11056	11089.3	5998.13	5592.92	5253.12	5301.7

## Sheet: LEAVES-SA vs. LEAVES-CONTROL
Alignment ID	Metabolite name	Annotation source	Library ID	Adduct type	INCHIKEY	pvalue	fc	fc2	S/N average	Leaf A1 MS1-1	Leaf A1 MS1-2	Leaf A2 MS1-1	Leaf A2 MS1-2	Leaf A3 MS1-1	Leaf A3 MS1-2	Leaf A4 MS1-1	Leaf A4 MS1-2	Leaf A5 MS1-1	Leaf A5 MS1-2	Leaf C1 MS1-1	Leaf C1 MS1-2	Leaf C2 MS1-1	Leaf C2 MS1-2	Leaf C3 MS1-1	Leaf C3 MS1-2	Leaf C4 MS1-1	Leaf C4 MS1-2	Leaf C5 MS1-1	Leaf C5 MS1-2
5112	D-Turanose	MS/MS | lib_lcmsms_pos | plant	NIST_1541718	[M+H-3H2O]+	RULSWEULPANCDV-PIXUTMIVSA-N	4.0191e-12	0.53738	-0.895985	121.63	11888.2	11702.9	12706	11716.3	10990.1	11562	13170.2	12656.7	13324.5	12694	7626.23	8046.37	6875.78	7208.82	6054.53	6160.68	6009.56	6030.33	5959.08	5809.81
8973	Verbasoside	MS/MS | lib_lcmsms_pos | FooDB:Plant	NIST_3162987	[M+Na]+	DORPKYRPJIIARM-GYAWPQPFSA-N	1.9351e-10	0.171503	-2.54369	88.8	4072.57	5346.06	5763.84	5124.72	5151.1	4946.95	5079.63	4458.27	5117.62	5252.82	1723.74	1580.23	52.696	572.41	579.26	526.96	52.696	52.696	1699.29	1788.97
8839	Folinic acid	MS/MS | lib_lcmsms_pos | FooDB:Strawberry	FiehnHILIC001946	[M+H]+	VVIAGPKUTFNRDU-ABLWVSNPSA-N	1.67142e-09	2.97244	1.57165	134.71	9256.01	9482.62	6170.85	5903.91	4596.15	4144.76	4449.41	4370.01	4743.89	4497.26	20773.5	20935.2	18443.6	18971.3	15458.2	14754.6	15242.7	14957	16077.2	15643.2
3278	phlormethylbutanophenone	ChemDistiller | PlantCyc	PlantCyc::CPD-19784	[M+H]+	ASABIRFQGVWRDC-UHFFFAOYSA-N	2.89268e-09	9.29423	3.21634	58.72	1820.25	1948.87	54.373	54.373	54.373	54.373	54.373	54.373	54.373	54.373	4524.12	4118.15	3249.44	3501.93	3423.78	3114.08	4230.79	4313.49	4369.93	4228.21
7966	Apimaysin	MS/MS | lib_lcmsms_pos | FooDB:Plant	NIST_3079397	[M+H-C6H10O4]+	LCQVQAZLYBJMGJ-LUSKEGLYSA-N	1.00577e-08	1.65515	0.726965	107.79	5140.99	5397.22	4727.89	4341.15	4072.72	3740.71	4490.29	4140.95	4309.59	4074.16	7883.68	7715.34	6455.36	6958.04	7417.31	7363.75	8301.72	8330.67	6605.27	6516.71
5167	Fonsecin	MS/MS | lib_lcmsms_pos | plant	NIST_1807554	[M+H]+	FKCYENFBFZUSDP-UHFFFAOYSA-N	1.66168e-08	4.77553	2.25566	67.3	2376.96	2298.57	1482.35	965.45	51.044	955.71	541.8	51.044	652.96	51.044	4811.33	4903.81	3995.1	3979.95	3510.65	3627.2	4345.23	4504.11	5542.64	5798.54
9754	NCGC00385982-01_C27H30N2O10_	MS/MS | lib_lcmsms_pos | plant	CCMSLIB00000855668	[M+Na]+	YUCVPZILWXKQCX-UHFFFAOYSA-N	3.95233e-08	3.37064	1.75302	135.27	10996.4	9987.12	5300.72	5132.88	4276.66	3826.63	3970.57	3814.82	3767.65	3520.13	18386.9	18516.4	15314.9	16170.2	14183.6	13650.4	21864.8	22723.9	21757.3	21446.7
3868	<i>N</i>-Formyl-L-kynurenine	ChemDistiller | PlantCyc	PlantCyc::N-FORMYLKYNURENINE	[M+H]+	BYHJHXPTQMMKCA-QMMMGPOBSA-N	6.32279e-08	0.0991105	-3.33482	65.47	5272.26	5163.4	3589.08	3081.31	2782.39	2520.33	3600.52	3398.07	3627.07	3402.17	50.725	50.725	50.725	50.725	50.725	50.725	1668.62	1536.83	50.725	50.725
7082	Sucrose	MS/MS | lib_lcmsms_pos | FooDB:Strawberry	NIST_1069679	[M+Na]+	CZMRCDWAGMRECN-UGDNZRGBSA-N	6.81629e-08	0.733351	-0.447424	211.28	13658.5	13010.6	14637.2	13651.4	14802.1	13975.3	12976.5	12278.6	12940.3	12153.8	10794.4	10792.9	10162.3	10451.8	10128.2	10113.8	8608.23	7933.45	9872.98	9472.74
9250	(2R,3S,4S,5S,6R)-2-[4-[7-hydroxy-3-(hydroxymethyl)-5-(3-hydroxypropyl)-2,3-dihydro-1-benzofuran-2-yl]-2-methoxyphenoxy]-6-methyloxane-3,4,5-triol	MS/MS | lib_lcmsms_pos | plant	VF-NPL-QTOF000832	[M+NH4]+	PHHIEOZUONPPQY-AIVHQYJCSA-N	9.20627e-08	1.87599	0.907654	74.08	4937.88	4509.54	3705.33	3135.04	2926.15	2644.72	3387.39	3354.57	3245.17	2758.43	7298.9	7009.6	5908.68	6482.5	5141.4	5273.06	6479.6	6579.31	7539.27	7204.92
5122	ophthalmate	ChemDistiller | PlantCyc	PlantCyc::CPD-20340	[M+H]+	JCMUOFQHZLPHQP-BQBZGAKWSA-M	9.58545e-08	0.432622	-1.20882	105.13	9486.78	8444.29	9915.19	9234.02	8511.85	9132.2	12737.6	12294.3	11978.9	10773.5	5298.57	5641.33	4188.58	4658.54	3489.11	3811.84	2171.75	2640.01	6187.77	6259.95
5121	ophthalmate	ChemDistiller | PlantCyc	PlantCyc::CPD-20340	[M+H]+	JCMUOFQHZLPHQP-BQBZGAKWSA-M	1.17388e-07	0.389363	-1.36081	91.91	11092.1	10526.3	9107.85	8393.59	7613.88	7695.79	7671.16	6922.6	7379.08	6989.68	3130.62	3408.17	3942.05	4079.17	2465.64	2357.74	4369.1	4220.99	2176.7	2319.59
8096	NCGC00386009-01_C19H30O9_(3E)-4-(8-Hydroxy-1,5-dimethyl-3-oxo-6-oxabicyclo[3.2.1]oct-8-yl)-3-buten-2-yl beta-D-glucopyranoside	MS/MS | lib_lcmsms_pos | plant	CCMSLIB00000853649	[M+Na]+	AQDQRSAVDNFBEA-HKMVGJDTSA-N	1.40782e-07	2.41347	1.27111	73.63	5409.45	5647.29	3716.19	3527.41	2477.94	2732.58	3373.5	3459.86	1329.43	2072.36	10172.8	9970.95	7813.67	8212.33	8469.7	8032.34	7401.77	7950.59	6921.1	6499.79
9449	NCGC00168804-02_C26H34O10_4-[3-(Hydroxymethyl)-5-(3-hydroxypropyl)-7-methoxy-2,3-dihydro-1-benzofuran-2-yl]-2-methoxyphenyl 6-deoxy-alpha-D-mannopyranoside	MS/MS | lib_lcmsms_pos | plant	CCMSLIB00000854629	[M+Na]+	FYWCDZKQBWSMDD-MWKDSIEZSA-N	1.48924e-07	1.24758	0.319129	251.8	18934.2	18700	19604.4	19588	18269.3	18041.1	18644.6	18763.8	17883.7	17626.9	24023.2	22744.6	22261.4	24123.7	21454.4	20925.9	24478.4	24326.1	24462.6	23319
2260	Coniferyl alcohol	MS/MS | lib_lcmsms_pos | FooDB:Strawberry	NIST_1371478	[M+H-H2O]+	JMFRWRFFLBVWSI-NSCUHMNNSA-N	2.6652e-07	1.83365	0.874719	95.21	11059.6	9857.58	7748.44	7006.42	6174.38	5938.31	7077.61	6625.97	6743.53	6589.4	15161.6	15573.2	12714.1	13188.5	11215.5	10736.3	13489.2	13722.6	15800.3	15594.7
7553	Tuberonic acid glucoside	MS/MS | lib_lcmsms_pos | FooDB:Plant	NIST_3313120	[M+H]+	JFDNMLUPLXZXGV-YAYCWVCRSA-N	3.3747e-07	3.22614	1.68981	97.56	3308.51	3141.95	1028.42	1622.75	102.842	102.842	1882.1	1349.61	1852.52	1300.46	6010.7	5940.28	5294.99	5343.21	4936.27	5039.01	4266.31	4455.29	4758.24	4580.28
5048	Kaempferol	MS/MS | lib_lcmsms_pos | FooDB:Strawberry	RIKENPlaSMA002180	[M+H]+	IYRMWMYZSQPJKC-UHFFFAOYSA-N	3.99911e-07	2.64731	1.40453	349.53	24860.3	24264	18564.4	17509	16804.8	16999.8	14146.9	14666.1	15391	14948.8	50609.2	51101.4	40160.1	41930.2	36347	37407.1	46311.6	46148.4	61154.5	60461.6
1662	(-)-Epigallocatechin	MS/MS | lib_lcmsms_pos | FooDB:Strawberry	NIST_1288079	[M+H-C8H8O4]+	XMOCLSLCDHWDHP-IUODEOHRSA-N	5.49742e-07	1.68005	0.748507	432.38	25371.4	23525.1	18008.6	16777.4	14682.3	15199.6	16259.9	15407.6	15745.4	14364.8	26734.5	27594	34645.6	35355.6	29898	27508	28584.6	28199.2	28084.7	27980
3123	Bisabolol oxide A	MS/MS | lib_lcmsms_pos | FooDB:Plant	NIST_1454519	[M+H-2H2O]+	WJHRAVIQWFQMKF-IPYPFGDCSA-N	6.18552e-07	2.75512	1.46211	151.76	11028.6	11139	5509.34	5194.87	4302.92	4183.91	3729.47	3564.36	3594.5	3262.18	15305.6	16523.8	13076.1	14282.4	11940.7	12535.9	19701.5	20134.7	15292.4	14141.1
7241	1-Naphthaleneacetamide	MS/MS | lib_lcmsms_pos | plant	NIST_1531750	[2M+H]+	XFNJVKMNNVCYEK-UHFFFAOYSA-N	7.50052e-07	2.4181	1.27388	82.86	3738.82	3736.4	2567.63	2178.2	751.11	1940.16	3045.71	2856.21	2826.77	2320.98	7345.74	7321.94	7727.4	8135.26	5494.84	5581.91	4821.84	4960.26	5814.63	5574.99
890	R-Kawain	MS/MS | lib_lcmsms_pos | plant	NIST_1948801	[M+H-C5H8O3]+	XEAQIWGXBXCYFX-GUOLPTJISA-N	1.08767e-06	44.8547	5.48719	16.01	127.634	127.634	127.634	127.634	127.634	127.634	127.634	127.634	127.634	127.634	7553.11	7783.62	5258.27	5695.57	6889.97	6623.6	3231.04	3545.11	5334.32	5335.26
7199	[(2S,3R,4S,5S,6R)-3,4,5-trihydroxy-6-(hydroxymethyl)oxan-2-yl] (2E,6E)-8-hydroxy-2,6-dimethylocta-2,6-dienoate	MS/MS | lib_lcmsms_pos | plant	VF-NPL-QTOF005848	[M+Na]+	QZIOPOIUZGGXKI-KOYXEPTDSA-N	1.14972e-06	2.91015	1.54109	56.14	2909.67	3007.27	570.87	986.02	512.22	51.222	2267.72	1954.08	2018.69	1597.7	5102.24	5079.46	5437.84	5804.33	4845.98	5031.02	3556.14	3943.9	3698.53	3700.46
5415	rhodioloside	MS/MS | lib_lcmsms_pos | FooDB:Plant	VF-NPL-QTOF009518	[M+H]+	ILRCGYURZSFMEG-RKQHYHRCSA-N	1.24836e-06	0.641023	-0.641553	109.46	8273.82	8029.8	7484.24	6470.74	6031.8	6311.01	7225.07	6076.1	6704.8	6479.77	4495.07	4520.74	4912.32	4890.59	4165.64	4186.1	4480.89	4467.58	4151.5	4015.99
6226	Longilactone	MS/MS | lib_lcmsms_pos | plant	NIST_3082911	[M+H-2H2O]+	KBBRVTNGCNCUCX-IRLOYWMGSA-N	1.49585e-06	1.7779	0.830178	122.44	15417.2	15970.4	11991.5	11288.4	10186.9	9774.54	10992.6	10717.5	10673.4	10926.3	23941.7	23925.5	19504.3	20719.5	16563.9	15359.9	20227.1	20807.2	24643	23991.5
1607	Isopentenyladenine	MS/MS | lib_lcmsms_pos | FooDB:Strawberry	NIST_1370113	[M+H-C5H8]+	HYVABZIGRDEKCD-UHFFFAOYSA-N	1.50993e-06	1.78016	0.832003	125.72	20978.1	20828.2	15171.8	15356.1	12842.7	13217.8	11519.9	11198.7	10869.7	10278.1	22753.4	23780.3	22931	23963.5	24896.1	24017.3	30288.1	28625.6	26757.4	25234
5372	5'-S-Methyl-5'-thioadenosine	MS/MS | lib_lcmsms_pos | FooDB:Strawberry	NIST_1348987	[M+H]+	WUUGFSXJNOTRMR-IOSLPCCCSA-N	2.32691e-06	1.88638	0.915619	602.39	58324.3	52891	44184.3	38978.7	32878.4	33024.9	28414.4	26290	27925.8	25095	58727	59059.6	63435.2	65196.9	66021.1	65732.2	85988.7	83445.9	73407.1	73186.6
1084	Chorismic acid	MS/MS | lib_lcmsms_pos | FooDB:Strawberry	NIST_1296313	[M+H-C3H6O4]+	WTFXTQVDAKGDEY-HTQZYQBOSA-N	2.80197e-06	1.69202	0.758745	579.28	71880.6	69036.9	51355.2	47515.8	42183.6	41711.5	41332.3	39171.7	42405.7	38961.3	74971.1	76180.4	96388.4	102518	85130.6	78925	79629.7	77494.3	76300.1	74029.3
3002	Isobutyrylphloroglucinol	MS/MS | lib_lcmsms_pos | FooDB:Strawberry	NIST_3053450	[M+H]+	BNEBXEZRBLYBCZ-UHFFFAOYSA-N	2.8165e-06	1.59278	0.671546	390.48	29536.2	28662.9	23637.1	21848.1	19242.4	19480.7	21533.3	21401.6	21622.7	21039.2	43854	44972.1	35470.2	36225.2	32520.2	30573.8	32260.9	31595.6	38319.2	37369.3
7323	RIBOFLAVIN	MS/MS | lib_lcmsms_pos | FooDB:Strawberry	MoNA024059	[M+H]+	AUNGANRZJHBGPY-SCRDCRAPSA-N	3.21998e-06	1.63243	0.707017	262.11	29495.8	30774.4	23505.2	22968.4	18713.7	19970.4	17834.2	18240	18447.6	17960.8	40317.3	41590.3	33358.1	33995.2	36314.4	35335.1	29121	28549.1	38670.8	38471.7
6641	Kelampayoside A	MS/MS | lib_lcmsms_pos | FooDB:Plant	NIST_3302209	[M+H-C5H8O4]+	CKGKQISENBKOCA-NHBPFIHPSA-N	3.45838e-06	1.80185	0.849475	1070.02	153952	151943	110986	104416	81194.6	83470.8	90340	86942.1	74207.6	72113.8	202026	203913	179599	187858	183729	174647	182772	182247	164045	158245
2588	Cinnamic acid ethyl ester	MS/MS | lib_lcmsms_pos | FooDB:Plant	NIST_1566215	[M+H]+	KBEBGUQPQBELIU-CMDGGOBGSA-N	3.94821e-06	2.51466	1.33036	72.24	5211.14	5072.26	3015.59	2218.33	1820.57	1558.16	2003.79	1692.23	1958.02	2152.41	6871.02	7046.93	8427.6	8823.74	4815.45	4759.27	5772.32	5725.57	7485.42	7420.44
7028	Linocinnamarin	MS/MS | lib_lcmsms_pos | FooDB:Plant	NIST_3082849	[M+Na]+	KPYQJVYNSWDFQU-ORXIWHNOSA-N	4.96995e-06	1.8708	0.903659	100.21	6261.63	5788.54	4204.72	3955.95	3169.68	3050.13	3622.42	3302.09	2822.02	2137.29	8356.3	8029.23	7481.73	7552.02	7310.3	7331.25	6556.29	6871.28	6151.36	6039.11
5831	Longilactone	MS/MS | lib_lcmsms_pos | plant	NIST_3082934	[M+H-3H2O]+	KBBRVTNGCNCUCX-IRLOYWMGSA-N	5.24608e-06	1.65615	0.727835	76.42	5497.2	5451.52	4026.04	3725.36	3547.21	3173.15	3598.18	3446.58	3777.14	3530	7848.48	7330.29	6115.16	6397.95	5090.36	5089.58	6609.08	6355.6	7559.39	7473.2
1575	(S)-(-)-Pulegone	MS/MS | lib_lcmsms_pos | FooDB:Strawberry	NIST_1686169	[M+H-H2O]+	NZGWDASTMWDZIW-QMMMGPOBSA-N	5.39746e-06	2.28124	1.18982	115.55	5886.05	5737.82	3187.83	3004.77	2327.72	2554.96	1483.56	1950.77	2602.02	2625.89	7392.2	7698.77	6053.75	6642.16	5772.56	5676.64	9129.81	9471.15	6992.57	6713.4
1534	(.+/-.)7-epi-Jasmonic acid	MS/MS | lib_lcmsms_pos | FooDB:Strawberry	NIST_1298664	[M+H-C2H6O3]+	ZNJFBWYDHIGLCU-QKMQQOOLSA-N	6.39439e-06	5.77042	2.52868	92.38	3131.55	2716.1	66.272	66.272	66.272	66.272	66.272	66.272	66.272	66.272	3872.18	4194.39	3191.06	3200.89	3124.05	2675.48	5070.23	4219.08	3662.06	3593.33
2732	Chelidonic acid	MS/MS | lib_lcmsms_pos | FooDB:Plant	NIST_1444307	[M+H]+	PBAYDYUZOSNJGU-UHFFFAOYSA-N	7.72267e-06	1.24074	0.311197	3100.67	265705	264509	226994	218517	223662	230402	206635	215314	215692	222947	291841	297507	276851	281890	271868	240309	301803	282823	312655	284207
6720	Enalaprilat	MS/MS | lib_lcmsms_pos | plant	CO000161	[M+H]+	LZFZMUMEGBBDTC-NWANDNLSSA-N	9.45533e-06	1.50577	0.590506	51.12	9262.93	9565.63	8625.38	8664.95	7945.13	8500.45	8586.93	8873.76	8454.33	8653.15	15530.3	15565	13150.5	12863.5	14267	13500.2	11291	10582.9	12720.1	11731.5
3013	Loliolide	MS/MS | lib_lcmsms_pos | FooDB:Plant	NIST_3101079	[M+H]+	XEVQXKKKAVVSMW-WRWORJQWSA-N	1.02846e-05	2.08192	1.05791	96.03	6497.95	6028.41	4812.81	4636.6	4299.97	4249.72	3670.59	3793.74	3740.02	3763.49	13318.6	13086.1	8254.7	8547.57	9286.06	8796.43	9198.04	8422.58	7906.24	7896.92
5730	Warfarin	MS/MS | lib_lcmsms_pos | plant	EQ310304	[M+H]+	QTXVAVXCBMYBJW-UHFFFAOYSA-N	1.03744e-05	1.44441	0.53048	76.59	5122.08	5234.17	4190.11	3980.16	3562.46	3791.32	3779.2	3238.61	3795.45	3690.69	6636.47	6657.16	5850.1	5886.54	4813.16	4927.68	6326.7	6400.53	5539.78	5293.3
8885	N1,N5,N10,N14-Tetra-trans-p-coumaroylspermine	MS/MS | lib_lcmsms_pos | plant	NIST_1923156	[478.3]+	KKJYIHSXTUGJLP-BRJCPHQQSA-N	1.09659e-05	5.59171	2.48329	53.53	1602.64	57.972	1335.2	57.972	777.12	57.972	57.972	57.972	57.972	57.972	1248.78	1249.91	1562.31	1885.13	2480.89	2445.52	3326.6	3005.81	2891.17	2945.98
9827	(7-Hydroxy-1-(4-hydroxy-3,5-dimethoxyphenyl)-3-(hydroxymethyl)-6,8-dimethoxy-1,2,3,4-tetrahydronaphthalen-2-yl)methyl pentopyranoside	MS/MS | lib_lcmsms_pos | plant	NIST_3279616	[M+Na]+	GWDZRGQRNHELQM-UHFFFAOYSA-N	1.27619e-05	4.62791	2.21036	73.33	3475.52	3229.68	1010.2	584.24	52.082	52.082	52.082	52.082	549.63	52.082	4659.39	4496.22	3806.34	4343.62	3607.85	3502.43	4548.49	4773.07	4237.54	4183.85
8419	Aminopterin	MS/MS | lib_lcmsms_pos | plant	NIST_1128714	[M+H]+	TVZGACDUOSZQKY-UHFFFAOYSA-N	1.38112e-05	1.68867	0.755883	509.66	22341.5	21654.4	16305.1	15686.9	11982.5	12267.8	15245.2	15647.6	10817.2	9288.38	25653.4	25634	25931.2	27194	23065.6	22837.2	25061.6	24689.3	27219.3	28102.3
4868	Phomopsolide B	MS/MS | lib_lcmsms_pos | plant	NIST_3282752	[M+H-H2O]+	JTHHOHSDOJJNFN-ZXSHYABSSA-N	1.45233e-05	2.07455	1.0528	147.56	4820.66	5178.76	5900.59	5554.06	5417.63	5399.21	5079.35	4975.69	4694.2	4337.96	13888.7	13825.4	8957.14	9151.39	8896.02	8865.12	9080.76	9274.34	12510.8	12095.1
8848	6''-O-Acetylgenistin	MS/MS | lib_lcmsms_pos | FooDB:Plant	NIST_1118639	[M+H]+	DXWGBJJLEDQBKS-LDBVRRDLSA-N	1.54765e-05	22.3019	4.4791	2175.81	50.636	50.636	50.636	50.636	50.636	50.636	50.636	50.636	50.636	50.636	1787.86	1610.92	1025.33	1024.66	572.35	949.1	547.9	1368.15	1377.18	1029.35
9891	(<i>Z,Z</i>)-biliverdin-IX &alpha;	ChemDistiller | PlantCyc	PlantCyc::BILIVERDINE	[M+H]+	RCNSAJSGRJSBKK-DSGIURRASA-L	1.65778e-05	1.93214	0.950198	142.59	8926.66	8564.21	6581.99	3908	3562.2	4119.53	4887.73	4020.82	5429.02	3671.79	10416.7	10423.5	9092.09	9852.73	9119.45	9304.12	8938.04	9189.32	13860.4	13505.3
534	3-Methyl-5-phenylpentan-1-ol	MS/MS | lib_lcmsms_pos | plant	NIST_3341850	[M+H-C4H10O]+	OXYRENDGHPGWKV-UHFFFAOYSA-N	1.66765e-05	4.2345	2.08219	113.65	3280.21	3287.84	1502.87	559.14	541.57	54.157	54.157	54.157	54.157	54.157	4345.19	4647.44	3277.39	3629.9	3356.69	3247.72	4940.55	4755.99	3840.78	3942.3
9600	(2R,3R,4S,5S,6R)-2-[3-[2-(4-hydroxy-3-methoxyphenyl)-3-(hydroxymethyl)-7-methoxy-2,3-dihydro-1-benzofuran-5-yl]propoxy]-6-(hydroxymethyl)oxane-3,4,5-triol	MS/MS | lib_lcmsms_pos | plant	VF-NPL-QTOF000668	[M+Na]+	DVWKMCPPEMUHBE-RAGYRXETSA-N	1.98941e-05	2.7071	1.43675	148.5	2836.42	2489.72	1696.12	1066.6	829.51	993.79	1865.92	601.62	585.12	506.83	3966.79	3687.53	4564.46	5293.99	3078.92	2784.64	2253.49	2625.96	4104.72	4108.58
1954	4-Hydroxymandelonitrile	MS/MS | lib_lcmsms_pos | FooDB:Strawberry	FiehnHILIC000102	[M+H]+	HOOOPXDSCKBLFG-UHFFFAOYSA-N	2.03056e-05	0.685756	-0.544232	1012.79	153756	145554	155618	138153	130462	127573	172386	156250	171110	159741	120059	125362	119654	121255	118049	109645	86403.5	81345.1	78529.6	75604.3
4311	&beta;-D-ribosylnicotinate	ChemDistiller | PlantCyc	PlantCyc::CPD-8259	[M+H]+	PUEDDPCUCPRQNY-ZYUZMQFOSA-N	2.34835e-05	1.42009	0.505982	495.31	52952.7	49175.2	43585.1	39871.7	37056.9	37174.3	34993.4	32683	34547	31879.1	56253.7	56332.1	51612.4	50697.9	54639.5	50836.7	54502.7	52592.9	68575.8	63355.6
5979	Tyr-His	MS/MS | lib_lcmsms_pos | plant	NIST_1634694	[M+H]+	ZQOOYCZQENFIMC-STQMWFEESA-N	2.50617e-05	5.73708	2.52032	235.4	1629.38	1042.68	40.647	40.647	40.647	40.647	1750.76	40.647	1410.29	885.16	5754.86	5737.96	4310.05	4521.63	4777.1	4614.47	1447.68	1848.91	3448.67	3247.93
5485	5-[(1S,2R,4aR)-1,2,4a,5-Tetramethyl-7-oxo-3,4,8,8a-tetrahydro-2H-naphthalen-1-yl]-3-methylpentanoic acid	MS/MS | lib_lcmsms_pos | plant	NIST_3158681	[M+H-H2O]+	RNWHJFUXZQBBLK-VWJHISDNSA-N	2.77541e-05	11.0981	3.47224	59.14	1552.31	1481.85	53.265	53.265	53.265	53.265	53.265	53.265	53.265	53.265	6051.73	6649.64	3618.79	3861.38	2004.26	1962.49	2877.56	2974.41	4426.08	3976.2
1628	Isoeugenol	MS/MS | lib_lcmsms_pos | FooDB:Strawberry	NIST_1623671	[M+H-C2H4]+	BJIOGJUNALELMI-ONEGZZNKSA-N	2.91667e-05	1.53464	0.617899	64.09	8541.31	8614.15	6155.58	6133.79	5526.43	5041.28	5454.55	5067.92	4954.25	5106.95	11208	10706.6	8769.76	8883.06	7934.37	7258.85	9157.46	9499.49	10071	9504.71
9743	3-(4-((1,3-Dihydroxy-1-(4-hydroxy-3-methoxyphenyl)propan-2-yl)oxy)-3-methoxyphenyl)propyl hexopyranoside	MS/MS | lib_lcmsms_pos | plant	NIST_3171281	[M+Na]+	NFUHNVZGHNEYRG-UHFFFAOYSA-N	3.0694e-05	0.345561	-1.53299	144.11	3022.45	2559.06	3937.88	3711.57	3302.5	3656.77	3805.12	3910.13	3525.14	3485.49	2780.32	2557.23	821.87	1429.88	1058.89	14.894	14.894	14.894	1264.93	2107.86
6425	Eicosanoids_15-oxoETE_C20H30O3	MS/MS | lib_lcmsms_pos | plant	CCMSLIB00001058244	[M+NH4]+	YGJTUEISKATQSM-USWFWKISSA-N	4.54146e-05	0.0528484	-4.242	75.69	31745.9	28517.7	45274.8	40094.8	57947.1	53273.9	25105.5	23170.5	75139.2	71984.1	51.777	542.78	6448.9	6622.85	51.777	51.777	4823.85	5203.61	51.777	51.777
9598	(2R,3R,4S,5S,6R)-2-[3-[2-(4-hydroxy-3-methoxyphenyl)-3-(hydroxymethyl)-7-methoxy-2,3-dihydro-1-benzofuran-5-yl]propoxy]-6-(hydroxymethyl)oxane-3,4,5-triol	MS/MS | lib_lcmsms_pos | plant	VF-NPL-QTOF000668	[M+Na]+	DVWKMCPPEMUHBE-RAGYRXETSA-N	4.91371e-05	1.71078	0.774657	187.57	14647.7	13488.3	8254.36	8038.73	7180.28	6432.53	9896.78	8984.27	8748.11	8408.74	18903.2	18817.3	16930.1	18157	13327.4	12712.6	12415.1	12421.9	18902.1	18363.3
1068	L-Phenylalanine	MS/MS | lib_lcmsms_pos | FooDB:Strawberry	NIST_1251530	[M+H-CH2O2]+	COLNVLDHVKWLRT-QMMMGPOBSA-N	8.37369e-05	5.08871	2.3473	115.37	2450.52	1653.21	53.071	53.071	53.071	53.071	53.071	53.071	53.071	53.071	2990.3	3007.25	2439.19	2664.52	2523.93	2181.68	1407.04	544.49	2682.44	2602.34
9285	1-Alaninechlamydocin_130134	MS/MS | lib_lcmsms_pos | plant	CCMSLIB00000478539	[M+H]+	QMNUPNOLDLHVTB-IWDBHXEASA-N	9.10753e-05	1.50557	0.590311	94.4	4904.72	4534.84	5209.19	4718.33	4603.36	4213.11	3276.3	3038.65	2951.29	2649.01	5169.53	5227.86	6011.75	6299.83	7152.2	6917.48	4883.67	5129.41	6620.59	6959.27
1970	Methylisoeugenol	MS/MS | lib_lcmsms_pos | FooDB:Plant	NIST_1687442	[M+H-C2H4]+	NNWHUJCUHAELCL-SNAWJCMRSA-N	0.000117299	1.47323	0.558984	72.12	5277.93	5065.03	3486.79	3314.84	2965.3	2876.39	3603.26	3240.08	3246.39	3347.22	6329.31	6308.66	4955	5073.49	4462.3	4328.38	5145.85	5132.5	5910.61	6013.76
6259	1,4a-dimethyl-9-oxo-7-propan-2-yl-3,4,10,10a-tetrahydro-2H-phenanthrene-1-carboxylic acid	MS/MS | lib_lcmsms_pos | plant	VF-NPL-QEHF007960	[M+NH4]+	MSWJSDLNPCSSNW-UHFFFAOYSA-N	0.000118235	0.0527203	-4.2455	74.77	14285.5	13602.5	18632.9	16650.4	25404.1	25645.6	12069.2	11986.3	38447.3	37988.6	98.028	98.028	3200.46	3336.6	98.028	98.028	1998.04	2196.44	98.028	98.028
5472	Delphinidin 3-galactoside cation	MS/MS | lib_lcmsms_pos | FooDB:Strawberry	NIST_1454945	[303.1]+	XENHPQQLDPAYIJ-YXRUOGEQSA-O	0.000127921	0.748013	-0.418864	444.49	14170.7	13303.8	13331.4	12189.3	10663	10908.8	11935.4	11355.6	10909.6	10601.7	7785.47	7961.36	9263.35	9664.24	7131.19	6681.71	11021.1	10692.2	9761.2	9327.96
8519	Kaempferol 3-ss-D-galactoside	MS/MS | lib_lcmsms_pos | FooDB:Strawberry	NIST_3069909	[M+H]+	JPUKWEQWGBDDQB-DTGCRPNFSA-N	0.000132139	1.76948	0.823325	232.13	5863.59	5404.3	4611.53	4123.18	3717.87	3771.19	4207.16	4010.07	4049.92	3934.27	9109.34	8961.18	6311.17	7077.02	5266.13	4987.19	8068.64	7942.19	10181	9410.15
2909	Scopoletin	MS/MS | lib_lcmsms_pos | FooDB:Strawberry	FIO00948	[M+H]+	RODXRVNMMDRFIK-UHFFFAOYSA-N	0.000133332	6.38744	2.67524	52.38	2226.79	1728.35	52.827	52.827	52.827	52.827	52.827	52.827	52.827	52.827	2872.95	2873.02	3221.21	3258.77	580.17	973.81	2737.33	2664.79	4513.42	4267.17
6339	9-hydroxy-1,4a-dimethyl-7-propan-2-yl-2,3,4,9,10,10a-hexahydrophenanthrene-1-carboxylic acid	MS/MS | lib_lcmsms_pos | plant	VF-NPL-QEHF007945	[M+NH4]+	GPFVBJYXFRIOFB-UHFFFAOYSA-N	0.00013401	0.105971	-3.23826	30.54	14305.6	12498.2	20875.8	18840.1	30038.3	28444.5	10897.2	10347.3	36950.9	34885.6	270.42	270.42	6010.25	6421.88	270.42	270.42	4410.35	4645.46	270.42	270.42
5660	AVOCADYNE	MS/MS | lib_lcmsms_pos | FooDB:Plant	VF-NPL-QEHF002986	[M+Na]+	OHLQBKZXSJYBMK-UHFFFAOYSA-N	0.000137054	1.61658	0.692948	78.78	3876.12	3451.12	3666.46	3126.75	3465.93	2809.48	3041.76	2841.73	2996.22	2710.66	4578.31	4890.04	4643.98	5316.79	6782.26	6614.72	5806.65	5497.8	3960.78	3617.07
9623	3-(4-((1,3-Dihydroxy-1-(4-hydroxy-3-methoxyphenyl)propan-2-yl)oxy)-3-methoxyphenyl)propyl 6-deoxy-.alpha.-L-mannopyranoside	MS/MS | lib_lcmsms_pos | plant	NIST_1945334	[M+Na]+	HZGGHVGIXDRDDH-GQEDLCMVSA-N	0.000156434	1.55174	0.633883	187.81	19995.3	20506.9	13564.6	13468.5	10974.7	11083.2	13476.9	13076.2	9204.34	8875.13	22990.2	23157.4	22602.8	23787.2	20334.4	21305.1	16785	17841.6	20161.5	19317.9
8995	6-Deoxy-.alpha.-L-mannopyranosyl-(1->4)-.beta.-D-glucopyranosyl-(1->6)-1-O-((2.alpha.,3.beta.,5.Xi.,6.beta.,9.Xi.)-2,3,6,23-tetrahydroxy-28-oxoolean-12-en-28-yl)-.beta.-D-glucopyranose	MS/MS | lib_lcmsms_pos | FooDB:Plant	NIST_3303414	[M+H-C18H32O15]+	NNWMHSNRRWMMBI-CTLQTXLOSA-N	0.000173302	3.0098	1.58967	66.57	1597.41	1643	2392.96	1868.05	1325.19	1818.74	69.636	69.636	69.636	69.636	1464.69	1493.84	2678.18	2669.72	4148.45	4374.67	4025.53	3692.15	4321.64	4009.84
5899	Dehydrophytosphingosine (not validated, isomer of 1679)	MS/MS | lib_lcmsms_pos | FooDB:Plant	PR310830	[M+H]+	CQKNELOTFUSOTP-UHFFFAOYSA-N	0.000204086	2.10072	1.07089	415.15	19739.4	18201.9	18491.9	16873	16187	16665	13139.1	11712.2	12175.1	11819.8	21131.8	20885.6	25172.6	27171.8	29304.4	30617.2	43158.9	43230.5	44074.4	40874.3
1666	(3Z,6Z)-nonadienal	ChemDistiller | PlantCyc	PlantCyc::CPD-8685	[M+H]+	FIDBXHOCOXRPRO-CWWKMNTPSA-N	0.000205006	4.19219	2.0677	148.28	5093.71	5058.09	3605.93	3142.72	2926.46	2186.52	2860.77	2602.14	2587.26	2423.32	23705.5	23709.1	13586	14066	10481.5	10122.5	8834.29	9173.09	11409.4	11103.8
3528	Cys-Val	MS/MS | lib_lcmsms_pos | plant	NIST_1631073	[M+H]+	OELDIVRKHTYFNG-NTSWFWBYSA-N	0.000222038	3.40621	1.76817	97.65	3119.59	2668.33	1340.67	505.68	503.51	29.362	1741.5	636.8	573.32	29.362	4828.71	4840.96	2768.15	2814.72	3040.44	2744.58	2353.93	2610.41	5956.06	6014.92
7856	dADP	ChemDistiller | PlantCyc	PlantCyc::DADP	[M+H]+	DAEAPNUQQAICNR-RRKCRQDMSA-K	0.000252477	0.83659	-0.257408	668.13	37054.4	34823.4	38137	35327.5	38650.4	37243.1	38626	36012.1	39595.3	37931.3	34043.8	34058.2	32441.3	33118.4	35537.2	33724.9	28009.9	26256.3	28634.5	26558.4
7643	Eleutheroside B	MS/MS | lib_lcmsms_pos | FooDB:Plant	NIST_1566886	[M+Na]+	QJVXKWHHAMZTBY-CZZVJJMOSA-N	0.0002728	0.691213	-0.532798	87.82	6221.31	6496.39	6374.45	5932.15	5836.97	5639.64	7070.26	6585.06	6522.32	6389.87	6727.67	6112.47	3839.64	4102.1	3902.83	4025.97	3392.4	3547.54	3954.76	3988.33
8054	NCGC00180835-03!2-[5-[2-[2-[5-(2-hydroxybutyl)oxolan-2-yl]propanoyloxy]propyl]oxolan-2-yl]propanoic acid	MS/MS | lib_lcmsms_pos | plant	CCMSLIB00000846081	[M+Na]+	JZCRGJSEBZCNAR-UHFFFAOYSA-N	0.000274609	3.53714	1.82258	85.37	3246.21	2765.63	984.74	996.32	53.875	53.875	53.875	53.875	53.875	53.875	2695.07	2803.34	2172.45	2707.01	2690.17	2369.18	4320.54	3952.07	2923.06	2782.52
1855	5-Hydroxyindole-3-acetic acid	MS/MS | lib_lcmsms_pos | FooDB:Strawberry	NIST_1347758	[M+H-CH2O2]+	DUUGKQCEGZLZNO-UHFFFAOYSA-N	0.000315696	1.72986	0.790656	1384.3	3640.38	3591.93	3185.58	2823.81	2318.99	2199.3	2719.9	2029.82	2810.03	2534.63	5967.24	6074.7	5731.98	5883.86	3387.72	2886.44	4026.69	3739.86	5204.18	5281.51
4747	Chenodeoxycholic acid	MS/MS | lib_lcmsms_pos | plant	NIST_1346550	[275.2]+	RUDATBOHQWOJDD-BSWAIDMHSA-N	0.000328497	1.48128	0.566841	101.46	9900.4	8932.39	11543.7	9844.86	9623.93	9641.51	7926.07	7949.95	7848.14	7910.39	15808.4	16346.8	11780.3	12855.9	16287.1	16778.3	12493.2	12262.6	10519.7	9843.61
7463	N6-Succinyladenosine; AIF; CE10; MS2Dec	MS/MS | lib_lcmsms_pos | plant	MoNA018561	[M+H]+	VKGZCEJTCKHMRL-MDBUBQOGSA-N	0.000339699	1.73767	0.797153	124.29	11916.2	11505.4	10816.1	9890.77	8099.87	8077.81	5389.4	5131	5544.56	5043.23	10391.2	9904.69	11799	12248.5	15799.1	15646.9	19473.7	18704.3	14308.6	13195
3430	noraucuparin	ChemDistiller | PlantCyc	PlantCyc::CPD-18575	[M+H]+	CDSGSEYGSWGVOJ-UHFFFAOYSA-N	0.000375163	1.47805	0.563691	33.03	4095.79	3974.19	2831.31	2514.7	2468.54	2311.04	2316.93	2107.49	1964.95	2331.39	4768.97	4648.35	4050.56	3904.3	3235.44	3385.63	3754.49	3509.33	4264.63	4261.87
4575	Thr-Phe	MS/MS | lib_lcmsms_pos | plant	NIST_1640068	[M+H]+	IQHUITKNHOKGFC-IEBDPFPHSA-N	0.000386155	5.63608	2.49469	116.26	1410.02	978.03	53.074	53.074	53.074	53.074	53.074	53.074	53.074	53.074	2663.06	2349.84	1720.98	1581.2	1645.1	1859.19	556.41	53.074	1591.06	1832.37
2343	L-Phenylalanine	MS/MS | lib_lcmsms_pos | FooDB:Strawberry	NIST_1251513	[M+H]+	COLNVLDHVKWLRT-QMMMGPOBSA-N	0.000425209	1.64613	0.719081	456.96	343096	341996	199573	185553	157400	161934	253132	241040	245241	235459	431426	443418	357597	366281	286096	273414	352847	337203	544176	499699
8378	2-Phenylethyl 6-O-pentopyranosylhexopyranoside	MS/MS | lib_lcmsms_pos | FooDB:Plant	NIST_1811973	[M+Na]+	ZRGXCWYRIBRSQA-UHFFFAOYSA-N	0.000453116	1.19938	0.262292	509.17	23751.3	24415.6	22587	21792.1	18519	19609.9	19352.5	19156.8	18863.7	18989.3	22609.8	22581	25092.1	26443.1	23265.7	23024.4	27761.1	28278.7	24155	25106.2
10899	Gingerglycolipid A	MS/MS | lib_lcmsms_pos | FooDB:Plant	NIST_1952909	[M+Na]+	MPSGDHOYFIUPSO-MDAKJLGTSA-N	0.000460906	2.05066	1.03609	1440.81	151820	147446	45784.6	43183.2	32005.6	32136.3	80420.5	80327.7	68148.5	63620.5	178488	180699	167961	175069	127727	125940	187235	194207	98325.3	91871.7
8620	Flavine mononucleotide	MS/MS | lib_lcmsms_pos | FooDB:Strawberry	NIST_1171349	[M+H]+	FVTCRASFADXXNN-SCRDCRAPSA-N	0.000480927	1.42767	0.513665	69.51	4370.99	4289.44	3343.53	2838.39	2193.02	2399.95	2980.56	2939.49	3013.1	2731.68	4943.35	4858.25	5005.01	5244.21	4557	4672.35	4271.84	4220.72	3505.06	3123.04
6874	(2E,6E,10Z)-12-hydroxy-10-(hydroxymethyl)-6-methyl-2-(4-methylpent-3-enyl)dodeca-2,6,10-trienoic acid	MS/MS | lib_lcmsms_pos | plant	VF-NPL-QEHF018932	[M+NH4]+	GWVCYAYKRPLWGK-AAMZJHKISA-N	0.000540003	0.00503007	-7.63521	115.6	5575.33	5172.69	7489.13	6841.05	9258.25	8634.66	7771.06	7498.78	22175.2	20512.9	50.768	50.768	50.768	50.768	50.768	50.768	50.768	50.768	50.768	50.768
4523	Phe-Val	MS/MS | lib_lcmsms_pos | plant	NIST_1631206	[M+H]+	IEHDJWSAXBGJIP-RYUDHWBXSA-N	0.000550217	1.80057	0.848457	111.32	3039.99	3124.7	2271.24	2557.55	1804.77	2331.66	1477.73	1570.72	1866.75	1922.74	4758.09	5067.27	3196.23	3500.29	3006.26	3087.49	3048.06	2937.61	5320.55	5632.9
4389	Gln-Leu	MS/MS | lib_lcmsms_pos | plant	NIST_1640001	[M+H]+	ARPVSMCNIDAQBO-SFYZADRCSA-N	0.000637291	1.52892	0.612514	243.1	5785.6	5967.91	4459.4	3749.1	3520.16	3126.98	3262.56	2960.65	3267.02	2993.55	7599.21	7550.69	6233.34	6073.39	6547.72	6339.86	4551.69	4484.1	5396.14	4993.88
4754	(10E,15Z)-9,12,13-Trihydroxyoctadeca-10,15-dienoic acid	MS/MS | lib_lcmsms_pos | FooDB:Plant	NIST_1869606	[M+H-3H2O]+	MKYUCBXUUSZMQB-MKZMYESJSA-N	0.000681478	1.41265	0.498407	298.31	255309	242049	291396	257322	257820	241469	164658	160547	160388	155215	233544	236452	283819	290122	358196	352694	328367	322933	347447	334728
6730	5S,12R-Dihydroxy-6Z,8E,10E,14Z-eicosatetraene-1,20-dioic acid	MS/MS | lib_lcmsms_pos | plant	NIST_1135295	[M+H-H2O]+	SXWGPVJGNOLNHT-XBAHGSDGSA-N	0.000699605	1.65867	0.73003	41.17	18669.7	16353.2	21051.8	17989.1	15980.5	14170.4	14510.4	12925.2	10319.4	9769.3	35269.6	35689.4	24277.9	26275.6	24067.4	23068.4	16989.5	16305.9	25794.7	23947.2
3485	Phomalone	MS/MS | lib_lcmsms_pos | plant	NIST_1958928	[M+H-2H2O]+	PTBQWWHUOMDVFS-UHFFFAOYSA-N	0.000710633	3.02674	1.59776	70.07	1757.58	570.29	1602.75	1459.38	639.49	519.3	545.12	51.93	51.93	51.93	3154.39	3026.69	2122.77	2002.26	1140.91	554.22	2272.93	1561.43	3229.51	2877.85
6856	1-Monolinolenin	MS/MS | lib_lcmsms_pos | FooDB:Strawberry	NIST_3173290	[M+H]+	GGJRAQULURVTAJ-PDBXOOCHSA-N	0.000749466	1.46384	0.549756	127.97	17272.1	16726.9	11920.5	10287.1	9372.95	9612.2	9324.14	8687.96	8821.65	8171.78	18834.1	19086.1	14708	16040	15556.7	16317.2	16178.8	16038.9	14894.1	13657.1
7239	1-Naphthaleneacetamide	MS/MS | lib_lcmsms_pos | plant	NIST_1531750	[2M+H]+	XFNJVKMNNVCYEK-UHFFFAOYSA-N	0.000790878	2.14447	1.10062	84.23	3305.52	3069.86	1994.92	1584.33	543.21	1487.47	1877.42	1948.68	2076.46	2250.84	6551.32	6754.82	4321.34	4812.38	4701.56	4146.02	2154.65	2472.37	3623.19	3649.11
2861	N-Acetyl-L-glutamic acid	MS/MS | lib_lcmsms_pos | FooDB:Strawberry	NIST_1180206	[M+H]+	RFMMMVDNIPUKGG-YFKPBYRVSA-N	0.0007932	2.21457	1.14703	71.29	4169.42	4131.9	3074.39	2740.56	2389.04	2282.77	546.82	546.52	570.76	52.16	4104	3903.76	3936.74	4272.97	5352.69	4768.59	6422.94	6316.86	3323.03	3006.74
4806	Nicotinamide N-oxide	MS/MS | lib_lcmsms_pos | plant	NIST_1360071	[2M+H]+	USSFUVKEHXDAPM-UHFFFAOYSA-N	0.000829068	0.799093	-0.323565	465.16	37733.3	36479.5	44717.8	41486.6	44825.6	44793	47606.9	43747.1	47315.2	43992.1	28895.8	29641.3	30754.5	31568.5	32580.1	30632.8	38103.5	36946.1	45111.8	41530.9
7933	NCGC00384571-01!(E)-3-(4-hydroxyphenyl)-N-[3-[[(E)-3-(4-hydroxyphenyl)prop-2-enoyl]-[4-[[(E)-3-(4-hydroxyphenyl)prop-2-enoyl]-[3-[[(E)-3-(4-hydroxyphenyl)prop-2-enoyl]amino]propyl]amino]butyl]amino]propyl]prop-2-enamide [IIN-based on: CCMSLIB00000847637]	MS/MS | lib_lcmsms_pos | plant	CCMSLIB00005722746	[M+Ca]2+	KKJYIHSXTUGJLP-BRJCPHQQSA-N	0.000846272	9.2814	3.21434	74.51	1350.8	935.28	506.12	515.63	50.612	50.612	50.612	50.612	50.612	50.612	3209.56	2805.13	3065.19	2986.96	50.612	587.72	5586.19	6099.17	4669.82	4459.43
2591	9,10-Dihydrojasmonic acid	MS/MS | lib_lcmsms_pos | FooDB:Plant	NIST_1688888	[M+H-2H2O]+	PQEYTAGBXNEUQL-NXEZZACHSA-N	0.000932433	1.38772	0.472714	93.53	7936.47	7188.75	7846.56	7610.48	7531.01	6934.8	5306.59	4785.08	4851.53	4802.26	6432.95	6598.04	8538.55	8649.56	10500	10628.5	9676.57	9909.32	9728.59	9253.08
3008	Loliolide	MS/MS | lib_lcmsms_pos | FooDB:Plant	NIST_3101079	[M+H]+	XEVQXKKKAVVSMW-WRWORJQWSA-N	0.000959841	1.21905	0.285753	119.7	11047.8	10415.2	9273.14	8601.05	8259.39	7519.2	7654.15	7477.34	8125.73	7910.32	11104.6	11006.6	9039.55	9540.69	10892.8	10538.6	11031.4	10009.5	11494.4	10525
10441	tiliroside	MS/MS | lib_lcmsms_pos | FooDB:Plant	VF-NPL-QEHF015154	[M+K]+	DVGGLGXQSFURLP-VWMSDXGPSA-N	0.00106757	0.900984	-0.150427	685.94	54981.3	52951.5	59666.5	56035.5	58429	56830.5	59078.2	56230.8	58226.3	54998.2	48817	48887.1	50457.8	52327.6	54826.8	54928	54838	54896.2	45890	45374.8
9420	3'-epi-Gemcitabine	MS/MS | lib_lcmsms_pos | plant	NIST_1499683	[2M+H]+	SDUQYLNIPVEERB-NKCGXFSVSA-N	0.00118794	0.666576	-0.585158	122.03	6203.82	5846.53	4821.46	4532.05	5016.35	4504.28	4301.02	3824.97	4316.84	4327.5	3819.28	3551.68	3187.61	3272.41	3070.31	3237.15	4352.41	4473.75	1472.24	1355.4
2535	4-Oxo-5-phenylpentanoic acid	MS/MS | lib_lcmsms_pos | plant	NIST_3164902	[M+H-H2O]+	LTNSOYZGFPWHOF-UHFFFAOYSA-N	0.00141816	1.43986	0.525927	69.24	4127.99	3597.61	2694.82	2596.96	1530.25	2067	2301.27	2353.21	2432.36	2167.28	4596.08	4474.27	3536.91	3644.12	2916.46	3034.51	3548.81	3385.82	4081.96	4028.39
5388	Aceritannin	MS/MS | lib_lcmsms_pos | plant	NIST_1914858	[M+H-C7H6O5]+	IGKWMHUOBKCUQU-LTCOOKNTSA-N	0.00148344	1.67994	0.748411	115.89	8484.38	8334	7283.55	7010.74	5321.61	5839.34	4376.97	4596.25	4411.13	4690.84	8047.73	7906.63	7767.75	8344.39	8422.29	8140.92	11792	11221.8	15511.3	14227.6
1150	Picolinic acid	MS/MS | lib_lcmsms_pos | plant	NIST_1051073	[M+H]+	SIOXPEMLGUPBBT-UHFFFAOYSA-N	0.00207043	1.15034	0.202057	1969.88	171095	164010	185736	168022	181671	171738	166922	155868	166560	157009	192899	196335	190005	194179	185020	173230	185237	172725	229074	223789
1064	Polygodial	MS/MS | lib_lcmsms_pos | plant	NIST_1403238	[M+H-C6H12O2]+	AZJUJOFIHHNCSV-KCQAQPDRSA-N	0.00209298	1.50457	0.589354	77.22	17657.3	16785.2	11702.6	10881.3	9774.18	9780.97	10943.9	10196.2	10814.2	10289.8	24368.4	24818.3	16420	17967.9	19759.6	19983.6	13599.8	13951.1	14004.3	13908.6
4979	L-Tyrosine	MS/MS | lib_lcmsms_pos | FooDB:Strawberry	KNA00172		OUYCCCASQSFEME-QMMMGPOBSA-N	0.00235061	2.23394	1.15959	1499.51	55021	55299.1	40917.3	37454.3	32592.4	32173	16338.3	15150	15841.7	15600.8	34094.7	33502.8	61380.6	61636.1	80050	75315.9	120186	116438	63917.8	60270.1
2856	Kynurenic acid	MS/MS | lib_lcmsms_pos | plant	NIST_1054519	[M+H]+	HCZHHEIFKROPDY-UHFFFAOYSA-N	0.00292121	1.55844	0.640101	277.2	36673.2	37099.2	22464	21804.2	16920.7	18738.4	16446.4	15843.1	16477	15212.2	26995.7	26733.4	32223.2	34525.9	27395.1	26211.8	46875.2	43705.3	38586.8	35986.1
9327	1-Palmitoyl-sn-glycero-3-phosphocholine	MS/MS | lib_lcmsms_pos | FooDB:Strawberry	NIST_1391065	[M+Na]+	ASWBNKHCZGQVJV-HSZRJFAPSA-N	0.00294015	2.9939	1.58202	467.38	3090.96	2857.89	1073.34	564.06	52.562	52.562	1899.83	1509.99	643.1	997.44	7081.74	6916.33	2859.17	3139.12	1455.33	1486.59	3067.45	3151.62	4642.39	4347.71
8694	Kaempferol 3-glucuronoside	MS/MS | lib_lcmsms_pos | FooDB:Strawberry	NIST_1929693	[M+H]+	FNTJVYCFNVUBOL-ZUGPOPFOSA-N	0.00305712	1.46584	0.551724	2356.91	261519	260635	181285	176415	152221	154277	113152	112368	114128	112464	215227	216622	248464	257605	251124	249382	295627	290748	190249	186671
8092	NCGC00385106-01_C18H26O10_beta-D-Glucopyranoside, phenylmethyl 6-O-[(2R,3R,4R)-tetrahydro-3,4-dihydroxy-4-(hydroxymethyl)-2-furanyl]-	MS/MS | lib_lcmsms_pos | FooDB:Plant	CCMSLIB00000854308	[M+Na]+	NJMQSVWMCODQIP-FQXXIRCGSA-N	0.00351928	1.26424	0.338266	582.28	36108.9	38023.1	31098	30707.1	27619.7	28395	26733.2	27485.7	26491.9	26865.9	39844.3	41463.2	43000.5	44234.9	42923.5	43245.9	30001	30550.5	31936.8	31474.2
3396	Canavanine	MS/MS | lib_lcmsms_pos | FooDB:Strawberry	VF-NPL-QEHF025442	[M+K]+	FSBIGDSBMBYOPN-VKHMYHEASA-N	0.00418918	0.809567	-0.304777	165.47	10100.2	9870.65	11390.7	11084	11649.5	11889.2	11048	10430.9	11125.6	10880.5	7391.3	7325.26	9017.13	8834.98	9453.07	8732.08	11968.3	11500.9	7175.98	7223.68
8794	Astragalin	MS/MS | lib_lcmsms_pos | FooDB:Strawberry	NIST_3081921	[M+Na]+	JPUKWEQWGBDDQB-QSOFNFLRSA-N	0.00458186	1.24885	0.320596	207.36	2523.68	2286.55	2885.52	2741.85	2800.38	2669.32	3064.4	2870.19	3014.52	2502.66	3725.33	3653.96	2856.47	3365.69	2355.76	2821.23	3656.79	3594.07	4228.51	3909.47
7937	4-(.beta.-D-Glucopyranosyloxy)pentan-2-yl (2E)-3-(4-hydroxyphenyl)prop-2-enoate	MS/MS | lib_lcmsms_pos | plant	NIST_3017610	[M+H]+	RMFDCHYDPYVNFA-AKVWERCLSA-N	0.0046128	2.44879	1.29207	99.71	8284.61	8582.51	5191.56	4820.54	4248.12	4404.28	2426.13	2427.71	2277.32	2040.14	9678.43	9935.03	6418.29	6693.32	7438.78	7536.3	21267.5	20543.1	10218.9	9738.39
2506	Xylose	MS/MS | lib_lcmsms_pos | FooDB:Plant	VF-NPL-QEHF011800	[M+Na]+	PYMYPHUHKUWMLA-VPENINKCSA-N	0.0046955	5.99336	2.58336	76.83	1802.26	961.03	517.73	51.773	51.773	51.773	51.773	51.773	51.773	51.773	557.51	1815.65	51.773	51.773	2705.28	2063	3267.7	3256.32	4074.68	3992.7
9624	3-(4-((1,3-Dihydroxy-1-(4-hydroxy-3-methoxyphenyl)propan-2-yl)oxy)-3-methoxyphenyl)propyl 6-deoxy-.alpha.-L-mannopyranoside	MS/MS | lib_lcmsms_pos | plant	NIST_1945334	[M+Na]+	HZGGHVGIXDRDDH-GQEDLCMVSA-N	0.00476581	1.15679	0.210123	3535.17	397194	391689	354476	331819	318388	313844	351519	332645	341449	331922	464384	470807	388986	412118	357341	359009	351542	365891	411910	426216
7078	Sucrose	MS/MS | lib_lcmsms_pos | FooDB:Strawberry	NIST_1069679	[M+Na]+	CZMRCDWAGMRECN-UGDNZRGBSA-N	0.00482872	0.839183	-0.252943	3986.44	18106	17126.8	17060	17408.8	18664.6	18546.5	15064.8	11482.5	15824.2	14322.1	14811.3	14976.5	14100.6	13600	13505.3	12538.2	13256.5	13319.1	14194.9	12993.1
2789	1-fluoro-2,4-dinitrobenzene	ChemDistiller | PlantCyc	PlantCyc::CPD-8983	[M+H]+	LOTKRQAVGJMPNV-UHFFFAOYSA-N	0.00497232	1.1942	0.256047	29.01	4310.63	4281.71	3331.73	3177.59	2986.52	3088.53	3003.61	2805.28	3144.82	2875.59	4111.42	4047.12	3674.51	3863.48	4176.98	3830.59	4208.97	3713.97	4164.03	3624.77
3993	CYTIDINE	MS/MS | lib_lcmsms_pos | FooDB:Strawberry	VF-NPL-QTOF007247	[M+H]+	UHDGCWIWMRVCDJ-XVFCMESISA-N	0.00541846	1.32704	0.40821	210.15	5200.17	5150.15	3752.28	3526.92	3241.96	3274.69	3358.43	3138.57	3233.19	3194.78	6264.54	6259.29	5244.94	5059.86	5316.13	4994.59	4491.86	3904.1	3922.57	3736.95
3117	<i>N<sup>2</sup></i>-acetyl-L-Lysine	ChemDistiller | PlantCyc	PlantCyc::N-ACETYL-L-LYSINE	[M+H]+	UIQZVXSKIBLUPN-QMMMGPOBSA-N	0.00546483	1.45177	0.537817	215.96	7802.11	7549.4	6656.72	5640.35	4796.09	4935.01	4344.55	4202.11	4261.48	3807.15	10346.6	10646.2	8000.2	7633.18	9314.2	8767.05	5478.21	5283.32	6949.23	5970.36
6147	16(17)-Epoxy-4Z,7Z,10Z,13Z,19Z-docosapentaenoic acid	MS/MS | lib_lcmsms_pos | plant	NIST_1133019	[M+H-H2O]+	BCTXZWCPBLWCRV-ZYADFMMDSA-N	0.00558404	1.75115	0.808303	110.69	10767.5	9345.6	5491.93	4845.47	4638.7	4180.11	3601.86	3519	3655.76	3431.57	14291.3	14503.7	7871.95	8464.45	9272.28	9188.89	9510.15	9719.48	5489.96	5334.98
2578	trans-Ferulic acid	MS/MS | lib_lcmsms_pos | FooDB:Strawberry	NIST_1356521	[M+H-H2O]+	KSEBMYQBYZTDHS-HWKANZROSA-N	0.00565659	1.39845	0.483832	127.91	8065.01	7653.93	8721.77	8271.27	7697.58	7250.2	5362.26	5285.97	5736.26	5333.73	12507.7	12940.9	7428.87	7177.6	7468.52	7302.97	9466.11	9367.6	11873.9	11487.7
9368	1-Oleoyl-sn-glycero-3-phosphocholine	MS/MS | lib_lcmsms_pos | FooDB:Plant	NIST_1149842	[M+H]+	YAMUFBLWGFFICM-PTGWMXDISA-N	0.00574463	26.1716	4.70993	1011.28	51.906	51.906	51.906	51.906	51.906	51.906	51.906	51.906	51.906	51.906	790.46	944.02	51.906	51.906	51.906	1386.07	2268.14	2458.41	3008.27	2573.54
3482	Asperfuran	MS/MS | lib_lcmsms_pos | plant	NIST_3164637	[M+H]+	WTFIFQXTQCYJKU-JWVODRKRSA-N	0.00635183	1.50703	0.59171	61.16	4808.82	4675.59	2789.02	2639.71	2209.57	1972.65	1671.26	1931.42	2051.58	1451.22	4368.76	4311.04	3884.05	4339.93	3787.37	4056.97	4038.38	3792.52	3585.34	3321.13
8155	(3E)-4-(1,2,4-Trihydroxy-2,6,6-trimethylcyclohexyl)but-3-en-2-yl hexopyranoside	MS/MS | lib_lcmsms_pos | plant	NIST_3161705	[M+Na]+	XZRJEYQBLXDNNU-AATRIKPKSA-N	0.00663383	0.456185	-1.13231	81.98	2013.64	1950.95	4393.9	4247.51	4330.99	4091.53	5101.89	5059.88	5118.26	4554.83	3360.87	3219.71	51.593	553.28	1289.13	792.63	51.593	51.593	4540.2	4730.66
8989	Cytidine	MS/MS | lib_lcmsms_pos | FooDB:Strawberry	NIST_1280557	[2M+H]+	UHDGCWIWMRVCDJ-XVFCMESISA-N	0.00676706	2.99846	1.58422	1117.53	4264.26	3679.77	1424.09	1059.63	54.464	54.464	54.464	54.464	54.464	54.464	5617.21	5424.43	3205.28	2912.81	3972.47	3917.36	2633.57	1943.61	1126.34	1493.92
9352	1-Linoleoyl-sn-glycero-3-phosphorylcholine	MS/MS | lib_lcmsms_pos | FooDB:Strawberry	NIST_1943374	[M+H]+	SPJFYYJXNPEZDW-UTJQPWESSA-N	0.00721738	1.66867	0.738697	1489.13	7457.26	6634.96	5166.76	4627.95	3932.93	3860.8	4641.27	4209.19	4200.71	4350.74	13068.1	12990.1	7529.01	7551.34	4305.86	4562.33	6830.81	7336.57	9056.85	8671.57
2587	Cinnamic acid ethyl ester	MS/MS | lib_lcmsms_pos | FooDB:Plant	NIST_1566215	[M+H]+	KBEBGUQPQBELIU-CMDGGOBGSA-N	0.00750841	60.8828	5.92796	82.24	14.987	14.987	14.987	14.987	14.987	14.987	14.987	14.987	14.987	14.987	1212.12	1393.83	1657.48	2204	14.987	14.987	14.987	14.987	1078.4	1518.72
2800	Ala-Pro	MS/MS | lib_lcmsms_pos | plant	NIST_1057782	[M+H]+	WPWUFUBLGADILS-WDSKDSINSA-N	0.00826677	1.39026	0.475351	50.14	2998.39	2960.11	3293.04	2795.5	2734.42	3083.22	1796.8	1479.64	2041.72	1996.63	2866.17	2685.32	3084.39	3135.86	2945.71	3087.88	3683.11	3612.51	4836.4	5068.58
5019	N-glucosylnicotinate	ChemDistiller | PlantCyc	PlantCyc::CPD-446	[M+H]+	CRXJVFIHZPTDKA-KAMPLNKDSA-N	0.00892431	0.450871	-1.14921	129.09	3791.52	3920.28	2613.22	2395.81	1306.97	1631.68	1725.24	1823.67	1727.78	1942.46	2297.28	2645.62	592.97	14.836	1941.65	1629.72	14.836	14.836	594.15	569.42
7088	NCGC00169827-03!(2E,4E)-12-hydroxy-13-(hydroxymethyl)-3,5,7-trimethyltetradeca-2,4-dienedioic acid [IIN-based on: CCMSLIB00000847643]	MS/MS | lib_lcmsms_pos | plant	CCMSLIB00005722037	[M+Na]+	QFZISQBFEIXWDM-UTLPMFLDSA-N	0.0092516	2.6543	1.40833	86.64	8315.93	7848.27	6770.2	5930.55	4939.87	4852.06	3785.07	3697.07	3396.2	3217.67	29639.5	29158.2	12883.3	13119	11164.3	11545.8	8130.15	8357.99	8235.28	7788.68
5457	Delphinidin	MS/MS | lib_lcmsms_pos | FooDB:Strawberry	RIKENPlaSMA003076	[M]+	JKHRCGUTYDNCLE-UHFFFAOYSA-O	0.00933134	1.1716	0.228485	6514.93	832484	806748	739769	699169	663902	655348	608705	596809	609027	590487	704862	719932	722729	750536	742676	733478	938656	928688	867815	860402
7921	(3E)-4-(1-Hydroxy-2,2,6-trimethyl-4-oxocyclohexyl)but-3-en-2-yl hexopyranoside	MS/MS | lib_lcmsms_pos | FooDB:Plant	NIST_1870104	[M+Na]+	QFTPTUOKFIIFJH-AATRIKPKSA-N	0.00934716	0.544965	-0.875766	359.99	43509.9	43007.4	49357.1	47035.6	42986.1	43163.1	84976.9	81696.5	78255.7	76407	35668.4	35857.4	27189.2	28814.3	17457.1	16383.4	9784.19	9491.06	73607.7	67491.8
1127	3,5-Dihydroxybenzenemethanol	MS/MS | lib_lcmsms_pos | plant	NIST_1332679	[M+H-H2O]+	NGYYFWGABVVEPL-UHFFFAOYSA-N	0.00962093	1.9352	0.952479	520.7	10323.2	9885.67	8865.5	8400.64	6838.38	6861.98	4098.2	4346.31	3935.42	4016.25	5911.24	6748.3	8269.66	9039.45	10399.8	11299.3	19154.1	18907.8	21098.5	19936.1
4312	&beta;-D-ribosylnicotinate	ChemDistiller | PlantCyc	PlantCyc::CPD-8259	[M+H]+	PUEDDPCUCPRQNY-ZYUZMQFOSA-N	0.00980168	1.11799	0.160906	722.78	58443.3	56447.2	64941.2	58930.3	62898.1	60362.8	59295.6	54758.2	59953.9	54226.2	65338.1	65286.2	66378.7	64418.1	63254.2	58600.5	63094.4	59087.1	79240.9	75202.7
6732	5S,12R-Dihydroxy-6Z,8E,10E,14Z-eicosatetraene-1,20-dioic acid	MS/MS | lib_lcmsms_pos | plant	NIST_1135295	[M+H-H2O]+	SXWGPVJGNOLNHT-XBAHGSDGSA-N	0.0098591	5.24137	2.38994	42.97	16736.7	14840.7	12844	10610.4	8874.54	8158.8	7233.93	6645.79	6424.23	5492.64	126057	127179	43068.4	43931.1	24978	24790.1	27316	27492	34715.2	33402.5
8892	NCGC00168861-02!(2S,3S,4S,5R,6S)-6-[2-(3,4-dihydroxyphenyl)-5,7-dihydroxy-4-oxochromen-3-yl]oxy-3,4,5-trihydroxyoxane-2-carboxylic acid	MS/MS | lib_lcmsms_pos | plant	CCMSLIB00000845058	[M+H]+	DUBCCGAQYVUYEU-ZUGPOPFOSA-N	0.0102859	1.17615	0.234075	5190.87	571849	558987	491145	473025	443277	439858	410317	401108	406572	397746	485633	490899	491278	513464	516477	505902	655080	646857	549289	548228
2592	Dodecanedioic acid	MS/MS | lib_lcmsms_pos | plant	NIST_1345018	[M+H-3H2O]+	TVIDDXQYHWJXFK-UHFFFAOYSA-N	0.011357	2.17044	1.11799	68.87	5031.31	4714.8	2589.85	2092.56	1684.74	579.8	57.98	57.98	57.98	57.98	2360.78	2381.88	3327.72	3670.1	3336.72	3380.25	5026.8	4504.88	4566.27	4179.25
7704	Rhodamine B cation	MS/MS | lib_lcmsms_pos | plant	NIST_1558370	[Cat-C3H8]+	CVAVMIODJQHEEH-UHFFFAOYSA-O	0.012938	10.5455	3.39856	29.62	52.247	52.247	52.247	52.247	52.247	52.247	52.247	52.247	52.247	52.247	52.247	810.81	52.247	529.96	522.47	1526.34	992.17	918.97	52.247	52.247
9104	1-Palmitoyl-sn-glycero-3-phosphocholine	MS/MS | lib_lcmsms_pos | FooDB:Strawberry	NIST_1390999	[M+H]+	ASWBNKHCZGQVJV-HSZRJFAPSA-N	0.0130889	1.77613	0.828736	1845.05	14259.7	13250.6	9664.21	8519.67	7413.88	7371.08	9951.01	10013	9570.39	9470.42	31883.2	31050.9	14842.7	15583.2	9054.68	9608.68	14168	14307.2	18685.8	17511.8
2705	L-Tyrosine	MS/MS | lib_lcmsms_pos | FooDB:Strawberry	NIST_1187798	[M+H]+	OUYCCCASQSFEME-UHFFFAOYSA-N	0.0131774	2.01205	1.00867	1625.02	24994.2	23188.1	21855.2	19504.8	16106.5	16333	10199.1	8930.23	9772.93	8235.12	11818.8	12015.4	20041.4	20646.1	29161	27685.4	46933	48914.7	52821.5	50118.2
4871	Tyr-Pro	MS/MS | lib_lcmsms_pos | plant	NIST_1630105	[M+H]+	VNYDHJARLHNEGA-RYUDHWBXSA-N	0.0132167	1.41845	0.504318	153.52	6080.56	5773.57	4171.19	4027.75	3086.83	3308.05	2539.08	2191.15	2500.17	2366.76	4801.8	4477.1	4552.64	4446.28	4302.29	3983.61	6960.53	6463.15	5741.06	5399.81
7391	Diphyllin	MS/MS | lib_lcmsms_pos | plant	NGA01111	[M+H]+	VMEJANRODATDOF-UHFFFAOYSA-N	0.014343	12.6335	3.65918	56.51	57.747	57.747	57.747	57.747	57.747	57.747	57.747	57.747	57.747	57.747	1867.58	1693.57	1034.28	1260.77	57.747	595.44	57.747	57.747	612.83	57.747
7920	[5-ethenyl-3-hydroxy-4-(3-hydroxyprop-1-en-2-yl)-2-(3-methoxy-3-oxoprop-1-en-2-yl)-5-methylcyclohexyl] 3,4-dihydroxy-2-methylidenebutanoate	MS/MS | lib_lcmsms_pos | plant	VF-NPL-QTOF006341	[M+H]+	PUUYULQKNFTVDK-UHFFFAOYSA-N	0.0155014	0.737423	-0.439436	291.64	45250.4	44939.8	30840.5	29423	25234.1	23909.3	37157.5	35847.6	33655.2	33122.5	29630.9	29071.4	28033.5	29882.6	23934.7	23143.9	11508.1	11580.4	32269.6	31211.4
4732	Trimethoprim	MS/MS | lib_lcmsms_pos | plant	NIST_1367556	[M+H-CH4]+	IEDVJHCEMCRBQM-UHFFFAOYSA-N	0.0171925	1.13668	0.184824	68.87	4282.04	3919.79	4138.85	3831.35	3426.44	3731.63	4165.61	3705.25	3849.21	3768.08	5155.21	5181.78	4678.47	4768.43	4657.11	4358.63	3919.02	3912.56	3765.64	3727.02
1899	3-O-Coumaroylquinic acid	MS/MS | lib_lcmsms_pos | FooDB:Strawberry	NIST_1955999	[M+H-C7H12O6]+	BMRSEYFENKXDIS-QHAYPTCMSA-N	0.0226973	1.72212	0.784188	67.98	24151.8	23533.5	18478.1	16054.3	15328.9	14688.5	13586.2	13195.5	13776.2	13897.2	15481.7	15642.2	20463.2	21044.6	20624	19030.9	38378.3	36832.4	51854.7	47709.1
7913	Diethyl 4-hydroxy-4-methyl-2-(4-nitrophenyl)-6-oxo-1,3-cyclohexanedicarboxylate	MS/MS | lib_lcmsms_pos | plant	NIST_1838064	[M+NH4]+	LRQXDKAQYSRKPX-UHFFFAOYSA-N	0.0230018	0.804902	-0.313115	194.04	24028.7	22632.2	17480.3	16132.8	14890.8	14167.3	19679.5	19112.7	18849.3	18019.4	17868.9	18468.5	17854.5	18724.6	15648.4	14732.1	10297	9924.86	13040.4	12342
6707	(E)-3-[4-[(2S,3R,4S,5S,6R)-3,4,5-trihydroxy-6-(hydroxymethyl)oxan-2-yl]oxyphenyl]prop-2-enoic acid	MS/MS | lib_lcmsms_pos | FooDB:Strawberry	VF-NPL-QEHF006262	[M+Na]+	LJFYQZQUAULRDF-FDGSXQGBSA-N	0.0249039	0.857902	-0.221115	2479.67	22239.7	22765.4	20733.3	19297.6	17074.7	17312.1	23586.4	23458.7	19263.9	18847.5	19218	19204.2	19616.7	20117.4	20746.5	19346.3	13819.6	13926.8	14755.2	14758.1
7677	7-Hydroxymitragynine	MS/MS | lib_lcmsms_pos | plant	NIST_1270469	[M+H-H2O]+	RYENLSMHLCNXJT-CYXFISRXSA-N	0.0264833	0.470177	-1.08873	44.09	1348.69	522.73	4175.72	3620.98	3631.79	3322.12	2990.02	2736.2	2530.73	2458.35	3904.85	3968.89	50.481	987.5	50.481	953.03	50.481	50.481	1850.95	986.23
4933	Aspartylphenylalanine; AIF; CE10; MS2Dec	MS/MS | lib_lcmsms_pos | plant	MoNA018594	[M+H]+	YZQCXOFQZKCETR-UWVGGRQHSA-N	0.0268279	12.7156	3.66853	68.99	50.525	50.525	50.525	50.525	50.525	50.525	50.525	50.525	50.525	50.525	1846.18	1920.58	543.52	599.91	551.67	760.59	50.525	50.525	50.525	50.525
3766	Threonylleucine (isomer of 809, 926)	MS/MS | lib_lcmsms_pos | plant	PR311040	[M+H]+	BQBCIBCLXBKYHW-UHFFFAOYSA-N	0.0294832	1.70607	0.770674	333.73	25671.2	23702.2	12748.6	12173.1	9520.44	8963.51	13727.6	12805.1	14209	13200.6	42163.2	43101.5	25152.5	24967.1	32611.8	31241.1	14186.2	14113.4	11790.6	10989
1971	Hydrocinnamic acid	MS/MS | lib_lcmsms_pos | FooDB:Strawberry	NIST_1048918	[M+H]+	XMIIGOLPHOKFCH-UHFFFAOYSA-N	0.0327229	18.9736	4.24592	169.04	51.817	51.817	51.817	51.817	51.817	51.817	51.817	51.817	51.817	51.817	660.53	965.23	1031.74	844.26	51.817	51.817	51.817	51.817	3222.47	2900.05
2643	(S)-pyrethrolone	ChemDistiller | PlantCyc	PlantCyc::CPD-13661	[M+H]+	IVGYSSJKFLEVIX-LWTINBJPSA-N	0.0360647	1.21579	0.2819	70.61	5168.86	4937.53	3395.22	3276.7	2798.88	2850.79	2736.15	2846.5	3118.19	2865.73	4777.15	4533.9	4282.68	4350.43	4202.44	4297.64	3601.66	3578.46	4068.82	3637.22
5171	Pentostatin	MS/MS | lib_lcmsms_pos | plant	NIST_1402352	[M+Na]+	FPVKHBSQESCIEP-JQCXWYLXSA-N	0.0362149	0.862027	-0.214196	136.74	8584.42	8151.97	7721.58	6970.03	6800.88	6686.55	9006.64	8910.47	9068.99	8625.44	8299.67	8427.28	7840.94	7938.66	7358.14	6879.43	5207.55	5167.18	6209.25	6088.3
1617	DL-Octopamine	MS/MS | lib_lcmsms_pos | FooDB:Plant	NIST_1056719	[M+H-H2O]+	QHGUCRYDKWKLMG-UHFFFAOYSA-N	0.0364584	2.01811	1.013	1650.41	36680.6	34751.1	29687.7	26876.7	23393.4	22373.7	3924.96	12529.9	322.451	3224.51	322.451	322.451	31849.2	33388.1	43496.1	39905.6	59033.7	58825.9	63719.8	60175
8290	5,7-Dihydroxy 3,3',4',5',6,8-hexamethoxyflavone	MS/MS | lib_lcmsms_pos | plant	NIST_1445515	[M+H]+	QXRNWRWFNALYGH-UHFFFAOYSA-N	0.0367007	1.49818	0.583208	117.33	9231.15	8485	5643.55	5047.68	4506.33	4421.9	3606.53	3399.33	3581.93	3358.84	6976.55	7009.5	7440.9	8139.34	5499.18	5283.78	12538.6	13013.2	5671.98	5256.81
5640	N-(1H-Indol-3-ylacetyl)methionine	MS/MS | lib_lcmsms_pos | FooDB:Strawberry	NIST_3377725	[M+H]+	YPMYDSHISNOZST-UHFFFAOYSA-N	0.0372558	1.35043	0.433414	71.83	4275.19	4558.01	3357.14	3081.37	2804.89	2868.14	2590.12	2213.45	1823.75	1420.3	2439.69	2214.89	3542.26	3759.94	4656.18	4771.68	5290.73	4906.68	4038.16	3531.82
2191	4-Aminoantipyrine	MS/MS | lib_lcmsms_pos | plant	NIST_1268864	[M+H-CH3NO]+	RLFWWDJHLFCNIJ-UHFFFAOYSA-N	0.0392149	3.85264	1.94585	47.43	2286.05	2494.49	677.27	52.678	52.678	52.678	3193.44	2594.14	3396.55	2803.26	8070.84	8167.74	1897.7	2242.24	2839.7	2562.2	2749.7	2566.8	18885.4	17836.6
4499	Met-Asn	MS/MS | lib_lcmsms_pos | plant	NIST_1642115	[M+H]+	JMEWFDUAFKVAAT-RITPCOANSA-N	0.0395582	2.49524	1.31918	159.44	13329.1	13003.1	4217.46	4027.14	2898.24	2401.05	839.38	556.74	50.675	50.675	17770	18316.3	9775.57	10731.8	17182.7	17440.4	5494.08	5968.62	50.675	506.75
1302	N-Phenyl-1-naphthylamine	MS/MS | lib_lcmsms_pos | plant	NIST_1570313	[M+H-C6H6N]+	XQVWYOYUZDUNRW-UHFFFAOYSA-N	0.0428909	5.36534	2.42367	28.71	500.6	50.06	50.06	50.06	50.06	50.06	50.06	50.06	508.58	50.06	2034.25	1973.7	50.06	988.34	50.06	50.06	50.06	50.06	1054.44	1262.27
11138	1-(1Z-Octadecenyl)-2-(9Z-octadecenoyl)-sn-glycero-3-phosphocholine	MS/MS | lib_lcmsms_pos | plant	NIST_1197280	[M+H]+	DSWOVBIRJNAJAF-NVJOKYTBSA-N	0.0444538	0.0360767	-4.79279	58.68	52.477	52.477	52.477	52.477	2696.5	2696.49	52.477	52.477	4525.97	4312.14	52.477	52.477	52.477	52.477	52.477	52.477	52.477	52.477	52.477	52.477
1999	Xanthosine	MS/MS | lib_lcmsms_pos | FooDB:Strawberry	NIST_1359317	[M+H-C5H8O4]+	UBORTCNDUKBEOP-UUOKFMHZSA-N	0.0457244	1.63222	0.706839	318.28	7608.66	7443.15	5742.09	5609.54	4384.8	4518.65	3378.64	3595.51	3736.89	3486.09	3275.3	3354.61	5620.42	5604.81	11761.7	11842.9	14025.6	13081.1	6196.31	6038.88
7519	(13<i>S</i>,14<i>R</i>)-1,13-dihydroxy-<i>N</i>-methylcanadine	ChemDistiller | PlantCyc	PlantCyc::CPD-21505	[M+H]+	NEHFHOHLVOGDCL-HVHHGIHYSA-O	0.046116	7.15387	2.83872	189.55	52.357	52.357	52.357	52.357	52.357	52.357	52.357	52.357	52.357	52.357	1026.64	52.357	52.357	52.357	52.357	523.57	803.86	1077.34	52.357	52.357
9330	1-Palmitoyl-sn-glycero-3-phosphocholine	MS/MS | lib_lcmsms_pos | FooDB:Strawberry	NIST_1391065	[M+Na]+	ASWBNKHCZGQVJV-HSZRJFAPSA-N	0.0494084	1.60179	0.679683	739.68	4295.05	4113.48	2772.83	2802.97	1856.75	2164.41	3256.31	3298.5	3391.12	3134.32	9091.32	8567.11	4063.29	4237.97	1529.84	1985.05	3623.57	3975.61	6569.08	6149.92

## Sheet: LEAVES-PH vs. LEAVES-CONTROL
Alignment ID	Metabolite name	Annotation source	Library ID	Adduct type	INCHIKEY	pvalue	fc	fc2	S/N average	Leaf A1 MS1-1	Leaf A1 MS1-2	Leaf A2 MS1-1	Leaf A2 MS1-2	Leaf A3 MS1-1	Leaf A3 MS1-2	Leaf A4 MS1-1	Leaf A4 MS1-2	Leaf A5 MS1-1	Leaf A5 MS1-2	Leaf D1 MS1-1	Leaf D1 MS1-2	Leaf D2 MS1-1	Leaf D2 MS1-2	Leaf D3 MS1-1	Leaf D3 MS1-2	Leaf D4 MS1-1	Leaf D4 MS1-2	Leaf D5 MS1-1	Leaf D5 MS1-2
1543	Perillaldehyde	MS/MS | lib_lcmsms_pos | FooDB:Strawberry	NIST_1153522	[M+H-H2O]+	RUMOYJJNUMEFDD-UHFFFAOYSA-N	3.23012e-14	0.320627	-1.64103	109.47	21453.4	20659.7	22693.6	21401.9	19645.8	18544.1	23326.4	22876.6	22478.7	22881.6	9188.57	8849.68	6649.59	6258.07	5790.84	5814.34	6528.11	6558.02	6722.82	6883.12
5112	D-Turanose	MS/MS | lib_lcmsms_pos | plant	NIST_1541718	[M+H-3H2O]+	RULSWEULPANCDV-PIXUTMIVSA-N	2.40904e-12	0.520545	-0.941905	121.63	11888.2	11702.9	12706	11716.3	10990.1	11562	13170.2	12656.7	13324.5	12694	6576.27	6171.8	6993	6747.03	7236.39	6726.13	6742.14	6673.93	4973.62	4880.06
9743	3-(4-((1,3-Dihydroxy-1-(4-hydroxy-3-methoxyphenyl)propan-2-yl)oxy)-3-methoxyphenyl)propyl hexopyranoside	MS/MS | lib_lcmsms_pos | plant	NIST_3171281	[M+Na]+	NFUHNVZGHNEYRG-UHFFFAOYSA-N	9.11731e-12	0.0328743	-4.9269	144.11	3022.45	2559.06	3937.88	3711.57	3302.5	3656.77	3805.12	3910.13	3525.14	3485.49	515.33	14.894	14.894	14.894	513.36	14.894	14.894	14.894	14.894	14.894
7643	Eleutheroside B	MS/MS | lib_lcmsms_pos | FooDB:Plant	NIST_1566886	[M+Na]+	QJVXKWHHAMZTBY-CZZVJJMOSA-N	2.53489e-10	0.547103	-0.870114	87.82	6221.31	6496.39	6374.45	5932.15	5836.97	5639.64	7070.26	6585.06	6522.32	6389.87	3671.62	3270.49	3997.21	3760.93	3885.75	3748.28	3719.83	3403.78	2298.16	2748.9
8556	Madecassic acid	MS/MS | lib_lcmsms_pos | FooDB:Plant	NIST_1279296	[M+H-3H2O]+	PRAUVHZJPXOEIF-JLYFEKRLSA-N	6.83565e-10	0.527753	-0.922066	218.81	12841.2	12551.3	15224.2	13707.6	13206.4	13449	14875	14421.3	14693.8	14770.2	8566	8348.48	7791.63	7102.66	7711.17	6820.15	5180.08	5089.04	8617.73	8521.36
2849	4-Hydroxy-4-[(E)-3-hydroxybut-1-enyl]-3,5,5-trimethylcyclohex-2-en-1-one	MS/MS | lib_lcmsms_pos | FooDB:Plant	NIST_3165627	[M+H-2H2O]+	KPQMCAKZRXOZLB-AATRIKPKSA-N	1.65732e-09	0.418472	-1.2568	262.99	71485.3	68534.6	65272	59447.4	54791.3	54256.9	68053.6	66101.6	70534.2	67764.2	31668.2	29197.4	27106.1	25681.7	26459.2	24400.5	27768.7	26619	25354.7	26178.1
8780	Madecassic acid	MS/MS | lib_lcmsms_pos | FooDB:Plant	NIST_1279277	[M+H-2H2O]+	PRAUVHZJPXOEIF-JLYFEKRLSA-N	3.29537e-09	0.54373	-0.879037	978.54	60159.9	57693.9	68488.3	63040.1	61202.5	62308.2	68146.4	65757.4	64506.7	66474	41233.3	38249.8	36326.6	34109.7	35847.1	33224.8	24473.5	23343.7	39797.5	40172.9
7768	benzyl alcohol 6-<i>O</i>-&beta;-<i>D</i>-xylopyranosyl-&beta;-<i>D</i>-glucopyranoside	ChemDistiller | PlantCyc	PlantCyc::CPD-14734	[M+H]+	WOGBNISMMIOPAZ-NWQIESHVSA-N	7.31682e-09	0.556595	-0.845301	100.78	6243.13	6027.34	5352.83	5309.71	4773.82	4582.06	5544.74	4970.34	5177.18	4944.78	3509.36	3420.68	2907.82	2732.17	2951.56	2768.09	2838.83	2818.1	2865.51	2646.18
3396	Canavanine	MS/MS | lib_lcmsms_pos | FooDB:Strawberry	VF-NPL-QEHF025442	[M+K]+	FSBIGDSBMBYOPN-VKHMYHEASA-N	1.38352e-08	1.34282	0.425269	165.47	10100.2	9870.65	11390.7	11084	11649.5	11889.2	11048	10430.9	11125.6	10880.5	16392.1	14858.6	15539.7	15383.7	15044.8	14515.8	14106.6	14083.1	13793.8	13279.3
1954	4-Hydroxymandelonitrile	MS/MS | lib_lcmsms_pos | FooDB:Strawberry	FiehnHILIC000102	[M+H]+	HOOOPXDSCKBLFG-UHFFFAOYSA-N	1.76368e-08	0.479088	-1.06164	1012.79	153756	145554	155618	138153	130462	127573	172386	156250	171110	159741	78429.2	70373.3	70926	70754.8	71808.1	67692.6	78736.9	76946.5	67145.2	70899.9
1536	(-)-Caryophyllene oxide	MS/MS | lib_lcmsms_pos | FooDB:Plant	NIST_1310590	[133.1]+	NVEQFIOZRFFVFW-RGCMKSIDSA-N	2.04116e-08	0.356264	-1.48898	166.97	48921.8	45931.5	38073.6	35283	33834.2	31623.5	38679.9	36789.8	37508.3	37080.4	14464	14569.3	12016.2	11490.1	11590	11361.9	15343.8	14779.3	15638.6	15454.8
7522	Sinapoylhexoside	MS/MS | lib_lcmsms_pos | FooDB:Strawberry	PR310737	[M+H]+	XRKBRPFTFKKHEF-UHFFFAOYSA-N	2.05899e-08	0.37683	-1.40802	86.11	7895.66	7354.84	6241.33	5544.4	5320.24	4991.47	6734.02	6382.09	6631.56	6193.93	2902.55	2174.8	2633.75	2101.23	2780.94	2476.41	2578.84	2518.4	1740.5	1941.95
5122	ophthalmate	ChemDistiller | PlantCyc	PlantCyc::CPD-20340	[M+H]+	JCMUOFQHZLPHQP-BQBZGAKWSA-M	2.68282e-08	0.362538	-1.4638	105.13	9486.78	8444.29	9915.19	9234.02	8511.85	9132.2	12737.6	12294.3	11978.9	10773.5	3663.57	3013.81	4470.49	4193.5	4903.72	4625.05	3524.4	3172.29	2561.99	3034.41
1546	Jasmonic acid	MS/MS | lib_lcmsms_pos | FooDB:Strawberry	NIST_1374236	[M+H-C2H6O3]+	ZNJFBWYDHIGLCU-HWKXXFMVSA-N	3.41261e-08	0.296113	-1.75578	94.36	17750.3	16410.2	13888.4	12523.8	12405.2	11259.4	17797	17287	17483.9	16967	4484.38	4527.92	5248.74	5229.56	6245.74	5927.02	3633.12	3630.41	3249	3357.96
7856	dADP	ChemDistiller | PlantCyc	PlantCyc::DADP	[M+H]+	DAEAPNUQQAICNR-RRKCRQDMSA-K	4.5713e-08	0.835806	-0.25876	668.13	37054.4	34823.4	38137	35327.5	38650.4	37243.1	38626	36012.1	39595.3	37931.3	33418.4	30015.1	32046.1	30150.8	30910.6	28902.2	33690.6	30536	31423.9	30996.6
2857	Pyridoxal	MS/MS | lib_lcmsms_pos | FooDB:Strawberry	NIST_1198531	[M+Na]+	RADKZDMFGJYCBB-UHFFFAOYSA-N	8.70427e-08	0.414667	-1.26998	160.78	20305.2	20557.3	14914.3	15230.3	13067.4	13279.6	17568.6	16935.9	17160.8	16705.3	9460.92	8652.51	6541.39	6233.4	6184.33	6235.88	6540.37	6218.2	6489.2	6164.4
5171	Pentostatin	MS/MS | lib_lcmsms_pos | plant	NIST_1402352	[M+Na]+	FPVKHBSQESCIEP-JQCXWYLXSA-N	9.50129e-08	0.586994	-0.768583	136.74	8584.42	8151.97	7721.58	6970.03	6800.88	6686.55	9006.64	8910.47	9068.99	8625.44	4885.71	4504.6	5139.76	5001.63	5796.76	5021.07	4695.17	4642.59	3869.28	3712.27
6649	NCGC00380859-01_C20H26O5_(5xi,6alpha,7beta)-6,11,12-Trihydroxy-7,20-epoxyabieta-8,11,13-trien-20-one	MS/MS | lib_lcmsms_pos | FooDB:Plant	CCMSLIB00000854718	[M+H]+	UXVPWKDITRJELA-YLPFRIKTSA-N	1.00832e-07	0.17459	-2.51796	116.38	8404.5	7546.05	12603.9	10612.9	9109.32	8613.56	7774.24	6996.5	6390.84	6748.41	3878.9	3727.57	572.99	56.561	56.561	56.561	56.561	56.561	3135.21	3207.76
7815	glucoiberverin	ChemDistiller | PlantCyc	PlantCyc::3-METHYLTHIOPROPYL-GLUCOSINOLATE	[M+H]+	CDXQFXHOBINAQR-KPKJPENVSA-M	1.17426e-07	0.718997	-0.475943	1056.16	45431.4	42781.4	44243.9	41613.6	41740.9	42112.8	41171	38455.1	42169.7	39439.4	34155.5	31803.3	28550.3	27284	26661.2	24073	34355.4	31410.4	32108.1	30972.9
7814	glucoiberverin	ChemDistiller | PlantCyc	PlantCyc::3-METHYLTHIOPROPYL-GLUCOSINOLATE	[M+H]+	CDXQFXHOBINAQR-KPKJPENVSA-M	1.17426e-07	0.718997	-0.475943	834.36	45431.4	42781.4	44243.9	41613.6	41740.9	42112.8	41171	38455.1	42169.7	39439.4	34155.5	31803.3	28550.3	27284	26661.2	24073	34355.4	31410.4	32108.1	30972.9
1068	L-Phenylalanine	MS/MS | lib_lcmsms_pos | FooDB:Strawberry	NIST_1251530	[M+H-CH2O2]+	COLNVLDHVKWLRT-QMMMGPOBSA-N	2.49491e-07	21.7665	4.44404	115.37	2450.52	1653.21	53.071	53.071	53.071	53.071	53.071	53.071	53.071	53.071	10366.3	9770.73	8197.58	7156.95	7285.33	6933.73	11017.8	10283.7	14161.7	13391.5
4575	Thr-Phe	MS/MS | lib_lcmsms_pos | plant	NIST_1640068	[M+H]+	IQHUITKNHOKGFC-IEBDPFPHSA-N	7.73021e-07	30.105	4.91193	116.26	1410.02	978.03	53.074	53.074	53.074	53.074	53.074	53.074	53.074	53.074	9272.76	8572.34	6569.68	6202.72	6112.44	5693.68	9591.06	8855.82	11738.6	12065.5
5415	rhodioloside	MS/MS | lib_lcmsms_pos | FooDB:Plant	VF-NPL-QTOF009518	[M+H]+	ILRCGYURZSFMEG-RKQHYHRCSA-N	1.02215e-06	0.64928	-0.623087	109.46	8273.82	8029.8	7484.24	6470.74	6031.8	6311.01	7225.07	6076.1	6704.8	6479.77	4498.63	4184.71	4293.05	3966.66	4846.29	4322.33	5134.73	5000.94	4188.68	4420.9
8155	(3E)-4-(1,2,4-Trihydroxy-2,6,6-trimethylcyclohexyl)but-3-en-2-yl hexopyranoside	MS/MS | lib_lcmsms_pos | plant	NIST_3161705	[M+Na]+	XZRJEYQBLXDNNU-AATRIKPKSA-N	1.71995e-06	0.0126257	-6.30749	81.98	2013.64	1950.95	4393.9	4247.51	4330.99	4091.53	5101.89	5059.88	5118.26	4554.83	51.593	51.593	51.593	51.593	51.593	51.593	51.593	51.593	51.593	51.593
6111	Quinoxalinedione + 2Methyl + C5H11O4	MS/MS | lib_lcmsms_pos | plant	PR310798	[M+H]+	SLOQSNHEHSCLGS-UHFFFAOYSA-N	1.9684e-06	0.512172	-0.965299	142.31	19185.6	19282.1	14416.4	13727.5	12377.1	11936.5	17409.4	16740.4	16892.2	16378.4	10079.9	9280.47	8261.18	7365.12	7737.6	7161.08	8473.9	8417.69	7308.47	7014.85
9556	(3E)-4-(1-Hydroxy-2,6,6-trimethyl-4-oxocyclohex-2-en-1-yl)but-3-en-2-yl 6-O-pentopyranosylhexopyranoside	MS/MS | lib_lcmsms_pos | FooDB:Plant	NIST_3095767	[M+Na]+	ZHAMWJWQXSZIAQ-AATRIKPKSA-N	2.21658e-06	0.48357	-1.0482	249.47	23103.9	23340.7	18155.2	17626.2	15001.8	15427.4	22396.2	22319.9	20860.7	21839.9	10505.4	9148.1	9568.32	8966.17	9686.98	9456.26	10371.2	9864.39	9496.87	9685.08
1127	3,5-Dihydroxybenzenemethanol	MS/MS | lib_lcmsms_pos | plant	NIST_1332679	[M+H-H2O]+	NGYYFWGABVVEPL-UHFFFAOYSA-N	2.25259e-06	2.30093	1.20222	520.7	10323.2	9885.67	8865.5	8400.64	6838.38	6861.98	4098.2	4346.31	3935.42	4016.25	15659.7	15067	12253.1	12174.8	13275.4	12248.4	17436	16992.1	20312.7	20058.3
7078	Sucrose	MS/MS | lib_lcmsms_pos | FooDB:Strawberry	NIST_1069679	[M+Na]+	CZMRCDWAGMRECN-UGDNZRGBSA-N	2.45204e-06	0.624648	-0.678884	3986.44	18106	17126.8	17060	17408.8	18664.6	18546.5	15064.8	11482.5	15824.2	14322.1	9746.71	11666.7	9693.97	9914.7	11158	12738.2	8931.73	10337.2	9049.15	8959.92
7920	[5-ethenyl-3-hydroxy-4-(3-hydroxyprop-1-en-2-yl)-2-(3-methoxy-3-oxoprop-1-en-2-yl)-5-methylcyclohexyl] 3,4-dihydroxy-2-methylidenebutanoate	MS/MS | lib_lcmsms_pos | plant	VF-NPL-QTOF006341	[M+H]+	PUUYULQKNFTVDK-UHFFFAOYSA-N	2.47245e-06	0.354453	-1.49633	291.64	45250.4	44939.8	30840.5	29423	25234.1	23909.3	37157.5	35847.6	33655.2	33122.5	11012.7	10684.2	12906.3	12366.3	15427.5	14051.1	13049.9	12427.2	9372.19	8996.85
5310	Tyr-Leu	MS/MS | lib_lcmsms_pos | plant	NIST_1721908	[M+H]+	AUEJLPRZGVVDNU-STQMWFEESA-N	2.51877e-06	65.1119	6.02485	91.35	66.868	66.868	66.868	66.868	66.868	66.868	66.868	66.868	66.868	66.868	4374.44	3799.29	3526.63	3054.63	3069.38	2691.7	5646.11	5402.95	5919.28	6054.61
2535	4-Oxo-5-phenylpentanoic acid	MS/MS | lib_lcmsms_pos | plant	NIST_3164902	[M+H-H2O]+	LTNSOYZGFPWHOF-UHFFFAOYSA-N	3.20768e-06	0.191801	-2.38232	69.24	4127.99	3597.61	2694.82	2596.96	1530.25	2067	2301.27	2353.21	2432.36	2167.28	1043.89	576.9	50.442	50.442	50.442	512.4	50.442	50.442	2019.1	557.14
6707	(E)-3-[4-[(2S,3R,4S,5S,6R)-3,4,5-trihydroxy-6-(hydroxymethyl)oxan-2-yl]oxyphenyl]prop-2-enoic acid	MS/MS | lib_lcmsms_pos | FooDB:Strawberry	VF-NPL-QEHF006262	[M+Na]+	LJFYQZQUAULRDF-FDGSXQGBSA-N	3.67836e-06	0.638785	-0.646597	2479.67	22239.7	22765.4	20733.3	19297.6	17074.7	17312.1	23586.4	23458.7	19263.9	18847.5	13776.8	12999.5	12890.3	12690.9	13317.4	12255.9	13791.1	13254.7	12910.9	12794.6
3404	Lecocarpinolide H	MS/MS | lib_lcmsms_pos | plant	NIST_1949190	[M+H-CH4O3]+	CVISOHZWXIVDFN-SYHQWPJTSA-N	4.00801e-06	0.372952	-1.42294	71.39	5351.42	4762.28	3687.91	3004.29	2728.76	2709.26	3555.94	3159.08	3409.19	3440.38	1793.73	1557.62	985.6	541.51	573.97	812.76	2250.02	1893.4	1510.53	1435.71
9427	NCGC00380271-01_C24H40O11_2-Cyclohexen-1-one, 3,5,5-trimethyl-4-[3-[(6-O-beta-D-xylopyranosyl-beta-D-glucopyranosyl)oxy]butyl]-	MS/MS | lib_lcmsms_pos | plant	CCMSLIB00000852543	[M+Na]+	LYJZPTUVRHPVNB-WRZQMYAXSA-N	4.86983e-06	0.0421151	-4.56952	69.82	4675.04	4707.78	2361.79	2406.57	1985.86	1810.44	3620.98	3968.43	3330.04	3297.53	40.776	40.776	40.776	40.776	40.776	40.776	523.2	505.2	40.776	40.776
2705	L-Tyrosine	MS/MS | lib_lcmsms_pos | FooDB:Strawberry	NIST_1187798	[M+H]+	OUYCCCASQSFEME-UHFFFAOYSA-N	4.93935e-06	2.37094	1.24546	1625.02	24994.2	23188.1	21855.2	19504.8	16106.5	16333	10199.1	8930.23	9772.93	8235.12	38294.2	34452.7	29009.8	28704.7	31760	29679.2	43377	41774.7	48910.6	51299
7082	Sucrose	MS/MS | lib_lcmsms_pos | FooDB:Strawberry	NIST_1069679	[M+Na]+	CZMRCDWAGMRECN-UGDNZRGBSA-N	5.29892e-06	0.7716	-0.374074	211.28	13658.5	13010.6	14637.2	13651.4	14802.1	13975.3	12976.5	12278.6	12940.3	12153.8	10138.9	8667.56	11388.2	10793.1	12469.4	11399.7	9754.08	8919.31	10028.6	9900.66
6648	NCGC00380859-01_C20H26O5_(5xi,6alpha,7beta)-6,11,12-Trihydroxy-7,20-epoxyabieta-8,11,13-trien-20-one	MS/MS | lib_lcmsms_pos | FooDB:Plant	CCMSLIB00000854718	[M+H]+	UXVPWKDITRJELA-YLPFRIKTSA-N	7.61102e-06	0.395969	-1.33654	80.59	8525.26	7578.52	11798.2	9926.54	8906.61	7692.42	8309.09	7344.58	5522.18	5204.05	5387.76	4704.4	2860.2	2188.89	1466.97	915.22	3067.49	2903.47	4194.87	4307.97
1533	Perillaldehyde	MS/MS | lib_lcmsms_pos | FooDB:Strawberry	NIST_1153524	[M+H-H2O]+	RUMOYJJNUMEFDD-UHFFFAOYSA-N	8.06487e-06	0.42284	-1.24182	74	8492.25	7670.59	5857.96	5460.66	4675.72	4823.76	5371.52	5557.89	5368.31	5033.92	2430.59	2463.66	2408.91	2394.99	2692.17	2510.14	3030.65	2760.31	2032.32	1933.15
3118	<i>N<sup>2</sup></i>-acetyl-L-Lysine	ChemDistiller | PlantCyc	PlantCyc::N-ACETYL-L-LYSINE	[M+H]+	UIQZVXSKIBLUPN-QMMMGPOBSA-N	8.48588e-06	2.08283	1.05855	418.17	6028.6	6209.17	4914.64	4615.95	4166.4	4384.41	3836.56	3305.22	3950.41	3325.78	10882.7	9749.81	7721.28	7588.09	7303.83	6618.16	10057.3	9234.64	11866.4	12157.8
9390	(3E)-4-(2,6,6-Trimethyl-4-oxocyclohex-2-en-1-yl)but-3-en-2-yl 2-O-((2S,3R,4R)-3,4-dihydroxy-4-(hydroxymethyl)tetrahydrofuran-2-yl)-.beta.-D-glucopyranoside	MS/MS | lib_lcmsms_pos | plant	NIST_3101593	[M+Na]+	IDPRQTHSAHGSDW-BTOUMFIXSA-N	8.54222e-06	0.250322	-1.99814	291.58	17212.6	18105.6	24474.5	23441.1	22185.5	22215.2	36509.4	35236.6	33622.1	34270.7	9252.39	9402.67	7259.22	6899.18	7006.16	6940.12	5554.65	4952.09	4945.27	4692.7
10008	Delphinidin-3-O-sambubioside	MS/MS | lib_lcmsms_pos | FooDB:Strawberry	RIKENPlaSMA003057	[M]+	TWYYVOVDSNRIJM-AFAGGVQESA-O	1.64112e-05	0.616549	-0.697713	94.61	4414.68	4290.67	6648.41	6229.79	6105.41	6168.06	6196.87	5745.94	5825.45	5278.31	3785.1	3576.02	4026.07	3787.87	4451.53	4097.05	1914.45	1901.45	3721.55	3822.75
5472	Delphinidin 3-galactoside cation	MS/MS | lib_lcmsms_pos | FooDB:Strawberry	NIST_1454945	[303.1]+	XENHPQQLDPAYIJ-YXRUOGEQSA-O	2.03421e-05	0.7502	-0.414653	444.49	14170.7	13303.8	13331.4	12189.3	10663	10908.8	11935.4	11355.6	10909.6	10601.7	9868.5	8925.34	8796.81	8288.86	8695.49	8333.71	9145.43	8796.73	9406.83	9293.17
8516	Cyanidin 3-rutinoside cation	MS/MS | lib_lcmsms_pos | FooDB:Strawberry	NIST_1454174	[Cat-C6H10O4]+	USNPULRDBDVJAO-FXCAAIILSA-O	2.13163e-05	0.448317	-1.15741	71.79	5559.55	5448.25	3523.54	3440.75	3095.24	2919.77	3702.28	3678.55	3824.64	3884.31	1509.21	1387.52	2532.57	1952.89	3098.9	2584.39	938.94	1424.46	568.25	1521.71
6730	5S,12R-Dihydroxy-6Z,8E,10E,14Z-eicosatetraene-1,20-dioic acid	MS/MS | lib_lcmsms_pos | plant	NIST_1135295	[M+H-H2O]+	SXWGPVJGNOLNHT-XBAHGSDGSA-N	2.28779e-05	0.46912	-1.09197	41.17	18669.7	16353.2	21051.8	17989.1	15980.5	14170.4	14510.4	12925.2	10319.4	9769.3	10838.8	9913.67	5843.37	5824.81	4646.64	4441.8	6403.66	5974.26	8495.73	8801.09
6644	methyl gibberellin A<sub>20</sub>	ChemDistiller | PlantCyc	PlantCyc::CPD-12333	[M+H]+	SXJSUTBDMIRVGQ-QPLUWCFDSA-N	2.71622e-05	0.247394	-2.01512	81.29	5843.94	5250.6	5934.41	5059.34	4689.2	4306.76	3243.39	2899.99	2889	2839.98	3307.43	2735.74	52.77	52.77	52.77	52.77	52.77	52.77	2159.3	2108.12
9449	NCGC00168804-02_C26H34O10_4-[3-(Hydroxymethyl)-5-(3-hydroxypropyl)-7-methoxy-2,3-dihydro-1-benzofuran-2-yl]-2-methoxyphenyl 6-deoxy-alpha-D-mannopyranoside	MS/MS | lib_lcmsms_pos | plant	CCMSLIB00000854629	[M+Na]+	FYWCDZKQBWSMDD-MWKDSIEZSA-N	2.72138e-05	1.13487	0.182527	251.8	18934.2	18700	19604.4	19588	18269.3	18041.1	18644.6	18763.8	17883.7	17626.9	22267.4	20210.3	21252.9	20207.8	22637.3	20231.7	21359.8	19099.9	22160.5	21721.7
7921	(3E)-4-(1-Hydroxy-2,2,6-trimethyl-4-oxocyclohexyl)but-3-en-2-yl hexopyranoside	MS/MS | lib_lcmsms_pos | FooDB:Plant	NIST_1870104	[M+Na]+	QFTPTUOKFIIFJH-AATRIKPKSA-N	3.35539e-05	0.272569	-1.8753	359.99	43509.9	43007.4	49357.1	47035.6	42986.1	43163.1	84976.9	81696.5	78255.7	76407	17368.7	15646.9	19163.7	18423	21578.5	21192.9	13348.8	12885.9	10745.2	10570.1
9869	Procyanidin B2	MS/MS | lib_lcmsms_pos | FooDB:Strawberry	NIST_1112122	[M+H]+	XFZJEEAOWLFHDH-NFJBMHMQSA-N	3.37995e-05	0.55408	-0.851835	1665.93	4484.74	4227.52	5625.73	5129.99	5143.21	4956.29	6932.54	6877.93	7101.3	6546.57	4476.35	4192.98	3751.93	3461.48	3422.15	3237.94	1478.69	1497.7	3084.28	2993.34
7857	dADP	ChemDistiller | PlantCyc	PlantCyc::DADP	[M+H]+	DAEAPNUQQAICNR-RRKCRQDMSA-K	3.43455e-05	0.590356	-0.760343	686.75	13797.9	13618	12837.9	11562.7	18155.5	16185.2	11309	9061.08	12968.9	13601.4	7552.5	9253.07	9590.95	7844.59	6682.97	6173.13	9443.6	9114.95	6508.28	6410.86
7933	NCGC00384571-01!(E)-3-(4-hydroxyphenyl)-N-[3-[[(E)-3-(4-hydroxyphenyl)prop-2-enoyl]-[4-[[(E)-3-(4-hydroxyphenyl)prop-2-enoyl]-[3-[[(E)-3-(4-hydroxyphenyl)prop-2-enoyl]amino]propyl]amino]butyl]amino]propyl]prop-2-enamide [IIN-based on: CCMSLIB00000847637]	MS/MS | lib_lcmsms_pos | plant	CCMSLIB00005722746	[M+Ca]2+	KKJYIHSXTUGJLP-BRJCPHQQSA-N	3.4399e-05	6.38874	2.67553	74.51	1350.8	935.28	506.12	515.63	50.612	50.612	50.612	50.612	50.612	50.612	3828.62	3176.34	2174.12	2147.5	1336.31	635.09	2167.17	2146.48	2909.82	2551.48
2643	(S)-pyrethrolone	ChemDistiller | PlantCyc	PlantCyc::CPD-13661	[M+H]+	IVGYSSJKFLEVIX-LWTINBJPSA-N	3.94314e-05	0.437196	-1.19365	70.61	5168.86	4937.53	3395.22	3276.7	2798.88	2850.79	2736.15	2846.5	3118.19	2865.73	2268.96	1858.75	1762.88	1023.32	1166.82	992.23	1848.23	1856.22	597.75	1487.12
541	Cuminyl alcohol	MS/MS | lib_lcmsms_pos | FooDB:Plant	NIST_1469109	[M+H-C2H6O]+	OIGWAXDAPKFNCQ-UHFFFAOYSA-N	4.02204e-05	0.470166	-1.08876	57.62	8137.83	7558.8	5297.69	4837.71	4112.85	4272.7	5788.08	5197.64	5659.4	5384.71	2673.82	2431.97	2521.62	2695.23	2877.89	2732.91	2902.43	2880.53	2426.52	2302.71
1982	Guanine	MS/MS | lib_lcmsms_pos | FooDB:Strawberry	NIST_1071439	[M+H]+	UYTPUPDQBNUYGX-UHFFFAOYSA-N	4.14774e-05	0.559966	-0.836588	219.75	31668	29304.7	23282.4	21586.7	19930.8	19318.3	21702.9	20209.3	20894.2	16274.4	16219.3	15536.1	11471	11160.4	10522.2	7413.59	13640.8	12645	13508.1	13412.1
7913	Diethyl 4-hydroxy-4-methyl-2-(4-nitrophenyl)-6-oxo-1,3-cyclohexanedicarboxylate	MS/MS | lib_lcmsms_pos | plant	NIST_1838064	[M+NH4]+	LRQXDKAQYSRKPX-UHFFFAOYSA-N	4.15944e-05	0.638543	-0.647145	194.04	24028.7	22632.2	17480.3	16132.8	14890.8	14167.3	19679.5	19112.7	18849.3	18019.4	10806.6	10193	12430.6	11844.8	14054	13337.4	12756.8	12069.4	10403.3	10230.1
3430	noraucuparin	ChemDistiller | PlantCyc	PlantCyc::CPD-18575	[M+H]+	CDSGSEYGSWGVOJ-UHFFFAOYSA-N	5.02711e-05	0.34431	-1.53822	33.03	4095.79	3974.19	2831.31	2514.7	2468.54	2311.04	2316.93	2107.49	1964.95	2331.39	2340.98	1106.83	525.61	50.662	978.44	507.62	795.04	50.662	1980	931.71
6425	Eicosanoids_15-oxoETE_C20H30O3	MS/MS | lib_lcmsms_pos | plant	CCMSLIB00001058244	[M+NH4]+	YGJTUEISKATQSM-USWFWKISSA-N	5.27688e-05	0.0928438	-3.42905	75.69	31745.9	28517.7	45274.8	40094.8	57947.1	53273.9	25105.5	23170.5	75139.2	71984.1	3379.1	3381.61	517.77	51.777	51.777	51.777	4905.38	4404.68	12461.1	12783.9
7677	7-Hydroxymitragynine	MS/MS | lib_lcmsms_pos | plant	NIST_1270469	[M+H-H2O]+	RYENLSMHLCNXJT-CYXFISRXSA-N	5.36254e-05	0.15188	-2.71899	44.09	1348.69	522.73	4175.72	3620.98	3631.79	3322.12	2990.02	2736.2	2530.73	2458.35	50.481	50.481	50.481	50.481	50.481	50.481	50.481	50.481	1940.43	1807.72
7393	Cilastatin	MS/MS | lib_lcmsms_pos | plant	NIST_1168391	[M+Na]+	DHSUYTOATWAVLW-MMURARSESA-N	5.58242e-05	0.661699	-0.595753	155.48	11666	11219.1	9412.04	8551.42	7778.79	8030.95	8393.26	7897.28	8353.68	7767.98	6363.18	6046.64	6361.64	5980.77	6222.16	6030.48	5972.42	5824.48	4994.62	5141.46
9420	3'-epi-Gemcitabine	MS/MS | lib_lcmsms_pos | plant	NIST_1499683	[2M+H]+	SDUQYLNIPVEERB-NKCGXFSVSA-N	6.3041e-05	0.662025	-0.595043	122.03	6203.82	5846.53	4821.46	4532.05	5016.35	4504.28	4301.02	3824.97	4316.84	4327.5	2677.62	2328.58	3501.33	3326.97	4367.82	3883.94	2968.17	2526.45	3277.81	2716.46
1064	Polygodial	MS/MS | lib_lcmsms_pos | plant	NIST_1403238	[M+H-C6H12O2]+	AZJUJOFIHHNCSV-KCQAQPDRSA-N	6.4316e-05	0.509067	-0.974072	77.22	17657.3	16785.2	11702.6	10881.3	9774.18	9780.97	10943.9	10196.2	10814.2	10289.8	7378.82	6622.71	4962.62	4799.09	3850.32	3742.24	7352.78	6779.41	7573.11	7429.07
7274	NCGC00385377-01_C19H32O7_4-(2,6,6-Trimethyl-4-oxo-2-cyclohexen-1-yl)-2-butanyl beta-D-glucopyranoside	MS/MS | lib_lcmsms_pos | FooDB:Plant	CCMSLIB00000849466	[M+H]+	NYLNHNDMNOPWAZ-ZEGIJQCCSA-N	7.4907e-05	0.341237	-1.55115	101.56	9368.38	8826.02	4846.36	4544.07	4045.21	3831.17	6058.22	5712.41	5756.14	5696.01	2078.99	1094.19	2343.57	1474.29	2628.5	2662.42	2368.48	1903.62	1574.9	1896.2
3117	<i>N<sup>2</sup></i>-acetyl-L-Lysine	ChemDistiller | PlantCyc	PlantCyc::N-ACETYL-L-LYSINE	[M+H]+	UIQZVXSKIBLUPN-QMMMGPOBSA-N	7.69663e-05	1.64557	0.718588	215.96	7802.11	7549.4	6656.72	5640.35	4796.09	4935.01	4344.55	4202.11	4261.48	3807.15	10767.3	9185.2	7115.4	7223.33	7146.45	7035.57	9881.34	9413.72	10140.5	10943.7
8585	Asiatic acid	MS/MS | lib_lcmsms_pos | FooDB:Plant	NIST_1238036	[M+H-2H2O]+	JXSVIVRDWWRQRT-UYDOISQJSA-N	7.86731e-05	0.0102552	-6.6075	96.64	1935.01	1439.54	4618.56	4421.38	4171.16	4377.56	7796	7584.24	7438.63	7472.79	52.563	52.563	52.563	52.563	52.563	52.563	52.563	52.563	52.563	52.563
9330	1-Palmitoyl-sn-glycero-3-phosphocholine	MS/MS | lib_lcmsms_pos | FooDB:Strawberry	NIST_1391065	[M+Na]+	ASWBNKHCZGQVJV-HSZRJFAPSA-N	8.66732e-05	0.392861	-1.34791	739.68	4295.05	4113.48	2772.83	2802.97	1856.75	2164.41	3256.31	3298.5	3391.12	3134.32	2265.43	2168.11	501.41	968.68	967.43	945.91	50.141	50.141	2362.15	1932.98
4930	Phe-Asp	MS/MS | lib_lcmsms_pos | plant	NIST_1640324	[M+H]+	HWMGTNOVUDIKRE-UWVGGRQHSA-N	0.000103346	0.721009	-0.471911	114.84	7256.01	7324.86	6519.26	6363.66	5916.98	6151.16	6056.53	5677.81	6227.41	5923.48	6358.73	5769.97	5196.6	4369.05	4467.08	3943.8	4316.33	3691.73	3899.78	3711.27
3008	Loliolide	MS/MS | lib_lcmsms_pos | FooDB:Plant	NIST_3101079	[M+H]+	XEVQXKKKAVVSMW-WRWORJQWSA-N	0.000104888	0.698238	-0.518208	119.7	11047.8	10415.2	9273.14	8601.05	8259.39	7519.2	7654.15	7477.34	8125.73	7910.32	6132.47	5845.48	4622.3	4539.21	5482.57	4993.92	7103.31	6824.34	7281.93	7420.76
6259	1,4a-dimethyl-9-oxo-7-propan-2-yl-3,4,10,10a-tetrahydro-2H-phenanthrene-1-carboxylic acid	MS/MS | lib_lcmsms_pos | plant	VF-NPL-QEHF007960	[M+NH4]+	MSWJSDLNPCSSNW-UHFFFAOYSA-N	0.000160217	0.118513	-3.07688	74.77	14285.5	13602.5	18632.9	16650.4	25404.1	25645.6	12069.2	11986.3	38447.3	37988.6	1820.46	980.28	98.028	98.028	98.028	98.028	3072.82	2860.73	8083.28	8236.66
6339	9-hydroxy-1,4a-dimethyl-7-propan-2-yl-2,3,4,9,10,10a-hexahydrophenanthrene-1-carboxylic acid	MS/MS | lib_lcmsms_pos | plant	VF-NPL-QEHF007945	[M+NH4]+	GPFVBJYXFRIOFB-UHFFFAOYSA-N	0.000166201	0.122554	-3.02851	30.54	14305.6	12498.2	20875.8	18840.1	30038.3	28444.5	10897.2	10347.3	36950.9	34885.6	3568.64	3305.81	270.42	270.42	270.42	270.42	3527.55	3378.05	6067.02	5798.26
1617	DL-Octopamine	MS/MS | lib_lcmsms_pos | FooDB:Plant	NIST_1056719	[M+H-H2O]+	QHGUCRYDKWKLMG-UHFFFAOYSA-N	0.000201472	2.25755	1.17476	1650.41	36680.6	34751.1	29687.7	26876.7	23393.4	22373.7	3924.96	12529.9	322.451	3224.51	45398.4	42383.8	35252.7	34324.5	38031.4	34933.1	48573.1	47322.2	54379.4	56835.7
7833	Euscaphic acid	MS/MS | lib_lcmsms_pos | FooDB:Plant	NIST_3095347	[M+H-CH6O4]+	OXVUXGFZHDKYLS-YFIQRXMRSA-N	0.000203532	0.476175	-1.07043	141.17	4217.81	4413.16	9013.1	9128.59	8856.4	8702.66	6201.54	6265.34	6025.1	6214.55	4600.75	4662.02	3053.35	2854.8	1458.56	1386.82	2156.47	2086.41	5307.49	5307.65
9624	3-(4-((1,3-Dihydroxy-1-(4-hydroxy-3-methoxyphenyl)propan-2-yl)oxy)-3-methoxyphenyl)propyl 6-deoxy-.alpha.-L-mannopyranoside	MS/MS | lib_lcmsms_pos | plant	NIST_1945334	[M+Na]+	HZGGHVGIXDRDDH-GQEDLCMVSA-N	0.000205147	0.85361	-0.228351	3535.17	397194	391689	354476	331819	318388	313844	351519	332645	341449	331922	319606	312648	294097	287159	292248	282364	289163	281586	299281	299558
8587	Olean-12-en-28-oic acid, 2,3,23-trihydroxy-, (4.alpha.)-	MS/MS | lib_lcmsms_pos | FooDB:Plant	NIST_3318521	[M+H-2H2O]+	RWNHLTKFBKYDOJ-UHFFFAOYSA-N	0.000224166	0.499735	-1.00077	209.42	7108.37	7016.96	15766.4	14533.1	14261.1	13698.9	10067.5	10355.7	10000.6	10726.9	7935.48	7589.66	5110.36	4613.26	3422.07	3313.44	3885.07	3516.7	8566.88	8784.74
8808	Euscaphic acid	MS/MS | lib_lcmsms_pos | FooDB:Plant	NIST_3095290	[M+H-H2O]+	OXVUXGFZHDKYLS-YFIQRXMRSA-N	0.00024016	0.457496	-1.12817	201.54	4681.31	4644.59	10909.9	10438	10312.4	10443.5	7091.18	7363.54	6908.79	7141.17	5374.68	5110.16	3283.25	2987.55	2246.05	1558.7	2358.68	1968.2	5970.76	5711.65
5135	Amorfrutin 2	MS/MS | lib_lcmsms_pos | plant	NIST_3163861	[M+H-H2O]+	UJSSSFNGQWZNEN-UHFFFAOYSA-N	0.00026566	0.466479	-1.10012	74.44	4917.9	4240.28	7340.98	6009.68	6575.41	5575.8	3865.57	3333.54	3666.94	3509.98	4146.19	3746.58	2316.98	2151.47	813.86	854.57	2285.48	1080.53	2685.09	2793.53
4523	Phe-Val	MS/MS | lib_lcmsms_pos | plant	NIST_1631206	[M+H]+	IEHDJWSAXBGJIP-RYUDHWBXSA-N	0.000285997	1.73728	0.796833	111.32	3039.99	3124.7	2271.24	2557.55	1804.77	2331.66	1477.73	1570.72	1866.75	1922.74	5497.33	4955.06	3962.22	3939.04	3517.04	3107.63	3069.65	2275.44	4047.04	3793.94
8101	.alpha.-Tocotrienol	MS/MS | lib_lcmsms_pos | FooDB:Strawberry	NIST_1643644	[M+H]+	RZFHLOLGZPDCHJ-KTWAZNHYSA-N	0.000300345	0.242955	-2.04124	95.85	684.1	1320.71	4598.72	4374.04	4370.53	4303.74	2806.16	2987.35	2935.59	2961.97	1544.42	1436.88	50.691	50.691	50.691	50.691	50.691	50.691	1916.46	2413.01
3766	Threonylleucine (isomer of 809, 926)	MS/MS | lib_lcmsms_pos | plant	PR311040	[M+H]+	BQBCIBCLXBKYHW-UHFFFAOYSA-N	0.000327369	1.81485	0.85985	333.73	25671.2	23702.2	12748.6	12173.1	9520.44	8963.51	13727.6	12805.1	14209	13200.6	30271.9	26437.7	21204.5	19506	20093.6	18187.2	31562.9	29572.2	33918.8	35522.6
8620	Flavine mononucleotide	MS/MS | lib_lcmsms_pos | FooDB:Strawberry	NIST_1171349	[M+H]+	FVTCRASFADXXNN-SCRDCRAPSA-N	0.000340504	0.609353	-0.71465	69.51	4370.99	4289.44	3343.53	2838.39	2193.02	2399.95	2980.56	2939.49	3013.1	2731.68	2603.38	2022.11	1898.33	1410.79	2179.06	1699.05	1922.47	1551.63	1954.06	1710.09
8092	NCGC00385106-01_C18H26O10_beta-D-Glucopyranoside, phenylmethyl 6-O-[(2R,3R,4R)-tetrahydro-3,4-dihydroxy-4-(hydroxymethyl)-2-furanyl]-	MS/MS | lib_lcmsms_pos | FooDB:Plant	CCMSLIB00000854308	[M+Na]+	NJMQSVWMCODQIP-FQXXIRCGSA-N	0.000474149	0.776699	-0.364573	582.28	36108.9	38023.1	31098	30707.1	27619.7	28395	26733.2	27485.7	26491.9	26865.9	26005.7	24399.8	23356.9	22878.2	23524.6	22303	22140.8	21130.1	22991.9	23912.6
1772	3-(2-Hydroxyethyl)indole	MS/MS | lib_lcmsms_pos | FooDB:Strawberry	NIST_1072744	[M+H-H2O]+	MBBOMCVGYCRMEA-UHFFFAOYSA-N	0.000533849	0.500663	-0.998088	782.43	6000.09	5495.38	4772.18	3843.78	3282.43	3286.8	7343.35	6887.41	7719.83	7386.73	3679.43	3092.28	2351.88	2193.16	2421.81	2227.69	3066.66	2503.85	3276.53	3232.85
6874	(2E,6E,10Z)-12-hydroxy-10-(hydroxymethyl)-6-methyl-2-(4-methylpent-3-enyl)dodeca-2,6,10-trienoic acid	MS/MS | lib_lcmsms_pos | plant	VF-NPL-QEHF018932	[M+NH4]+	GWVCYAYKRPLWGK-AAMZJHKISA-N	0.000680724	0.0445511	-4.48839	115.6	5575.33	5172.69	7489.13	6841.05	9258.25	8634.66	7771.06	7498.78	22175.2	20512.9	50.768	50.768	50.768	50.768	50.768	50.768	50.768	50.768	1907.4	2182.96
7070	NCGC00385117-01_C15H18O9_(2E)-3-[3-(beta-D-Glucopyranosyloxy)-4-hydroxyphenyl]acrylic acid	MS/MS | lib_lcmsms_pos | FooDB:Plant	CCMSLIB00000852845	[M+Na]+	QOPSZFXPZWQLOG-VHCZEJTMSA-N	0.000747365	7.90428	2.98263	201.05	51.408	51.408	51.408	51.408	51.408	51.408	582.04	583.58	514.08	523.44	3971.35	3559.06	2511.27	2166.07	1792.03	1179.38	1010.94	521.87	1143.97	1996.36
2912	2D-5-<i>O</i>-methyl-2,3,5/4,6-pentahydroxycyclohexanone	ChemDistiller | PlantCyc	PlantCyc::PENTAHYDROXYCYCLOHEXANONE	[M+H]+	VKPFEZAOAAZDPP-QCNSFQOVSA-N	0.000749218	1.18401	0.243684	76.25	3368.65	3401.91	3093.52	2665.05	2809.63	2447.35	2989.34	2608.66	2893.41	2780.6	4018.96	3669.53	3534.82	3451.73	3239.64	3307.65	3372.22	3011.28	3285.56	3513.77
7088	NCGC00169827-03!(2E,4E)-12-hydroxy-13-(hydroxymethyl)-3,5,7-trimethyltetradeca-2,4-dienedioic acid [IIN-based on: CCMSLIB00000847643]	MS/MS | lib_lcmsms_pos | plant	CCMSLIB00005722037	[M+Na]+	QFZISQBFEIXWDM-UTLPMFLDSA-N	0.000770943	0.428095	-1.224	86.64	8315.93	7848.27	6770.2	5930.55	4939.87	4852.06	3785.07	3697.07	3396.2	3217.67	3871.32	3592.97	1701.79	1222.7	538.39	51.255	2251.79	2120.81	3491.33	3740.9
3140	Tryptophan	MS/MS | lib_lcmsms_pos | FooDB:Strawberry	CCMSLIB00005720200	[M+H]+	QIVBCDIJIAJPQS-VIFPVBQESA-N	0.00125052	0.529291	-0.917867	1845.96	12352.8	11556.4	8951.09	8626.04	6865.55	7231.62	16330	15829.6	16464.8	15613.1	7518.9	6836.35	5824.56	5302.07	5952.99	5295.72	6712.29	6177.49	6948.48	6851.28
2814	DL-Indole-3-lactic acid	MS/MS | lib_lcmsms_pos | FooDB:Strawberry	NIST_1071870	[M+H-H2O]+	XGILAAMKEQUXLS-UHFFFAOYSA-N	0.0013449	0.508072	-0.976896	9268.76	62314.3	61347.6	43360.2	40529.2	32818.9	34345.8	80113.9	78580.9	84733.2	79154.2	35460.3	32418	27583.7	25825.1	26620.3	24348.6	31671.4	30371.8	34486.4	34684.5
494	Phenylacetaldehyde	MS/MS | lib_lcmsms_pos | FooDB:Strawberry	NIST_1192288	[M+H-H2O]+	DTUQWGWMVIHBKE-UHFFFAOYSA-N	0.0013535	0.313775	-1.6722	60.81	3600.61	3151.78	2573.04	2420.82	525.59	620.57	1902.04	1866.61	2202.81	1703.88	1493.24	577.05	586.04	16.108	16.108	16.108	693.61	1503.65	530.61	1021.13
5019	N-glucosylnicotinate	ChemDistiller | PlantCyc	PlantCyc::CPD-446	[M+H]+	CRXJVFIHZPTDKA-KAMPLNKDSA-N	0.00145045	0.33364	-1.58364	129.09	3791.52	3920.28	2613.22	2395.81	1306.97	1631.68	1725.24	1823.67	1727.78	1942.46	1596.38	1131.01	14.836	14.836	14.836	14.836	14.836	562.13	2091.55	2177.97
9104	1-Palmitoyl-sn-glycero-3-phosphocholine	MS/MS | lib_lcmsms_pos | FooDB:Strawberry	NIST_1390999	[M+H]+	ASWBNKHCZGQVJV-HSZRJFAPSA-N	0.00153986	0.674788	-0.567495	1845.05	14259.7	13250.6	9664.21	8519.67	7413.88	7371.08	9951.01	10013	9570.39	9470.42	8821.25	8373.3	6264.21	6234.99	5653.56	5387.81	5524.2	4837.76	8148.97	7884.48
6106	D-(+)-Cellobiose	MS/MS | lib_lcmsms_pos | FooDB:Strawberry	NIST_1541848	[M+H-H2O]+	GUBGYTABKSRVRQ-QRZGKKJRSA-N	0.00157574	0.617216	-0.696152	207.69	5216.73	5006.58	3618.24	5377.68	3755.18	3496.77	5533.61	2730.88	2927.17	2883.15	2859.8	2587.71	2574.94	1812.16	2746.08	2572.38	2338.58	2390.26	2793.49	2350.25
3557	N-Acetyl-D-galactosaminitol	MS/MS | lib_lcmsms_pos | plant	NIST_1543070	[M+H]+	DWAICOVNOFPYLS-OSMVPFSASA-N	0.00172464	0.798739	-0.324203	363.06	43126.9	41155.5	32128.8	30720.3	30148.4	30048	32869.9	29903.3	32354.6	31373.4	30240.8	28353.5	24919.7	23383.7	24877.7	22173.8	30492.2	29711.5	25827.1	26662.6
4311	&beta;-D-ribosylnicotinate	ChemDistiller | PlantCyc	PlantCyc::CPD-8259	[M+H]+	PUEDDPCUCPRQNY-ZYUZMQFOSA-N	0.00183329	0.753898	-0.40756	495.31	52952.7	49175.2	43585.1	39871.7	37056.9	37174.3	34993.4	32683	34547	31879.1	37380.6	33643.2	29648.4	27836.9	28275.8	26146	28472.8	27129.2	29090.9	29350.4
3013	Loliolide	MS/MS | lib_lcmsms_pos | FooDB:Plant	NIST_3101079	[M+H]+	XEVQXKKKAVVSMW-WRWORJQWSA-N	0.00219414	0.70852	-0.49712	96.03	6497.95	6028.41	4812.81	4636.6	4299.97	4249.72	3670.59	3793.74	3740.02	3763.49	4096.06	3522.38	2839.7	2662.85	2817.82	2512.25	3546.13	3378.37	3430.11	3427.24
7966	Apimaysin	MS/MS | lib_lcmsms_pos | FooDB:Plant	NIST_3079397	[M+H-C6H10O4]+	LCQVQAZLYBJMGJ-LUSKEGLYSA-N	0.00219428	1.24287	0.313677	107.79	5140.99	5397.22	4727.89	4341.15	4072.72	3740.71	4490.29	4140.95	4309.59	4074.16	6401.27	6018.69	5347.86	5180.67	4483.59	4532.7	5239.92	5028.51	6443.79	6550.83
2800	Ala-Pro	MS/MS | lib_lcmsms_pos | plant	NIST_1057782	[M+H]+	WPWUFUBLGADILS-WDSKDSINSA-N	0.00277274	1.37248	0.456785	50.14	2998.39	2960.11	3293.04	2795.5	2734.42	3083.22	1796.8	1479.64	2041.72	1996.63	4806.27	4090.52	3358.8	3081.55	3378.01	3374.55	3087.35	2791.14	3307.51	3282.62
4747	Chenodeoxycholic acid	MS/MS | lib_lcmsms_pos | plant	NIST_1346550	[275.2]+	RUDATBOHQWOJDD-BSWAIDMHSA-N	0.00285667	0.751097	-0.412929	101.46	9900.4	8932.39	11543.7	9844.86	9623.93	9641.51	7926.07	7949.95	7848.14	7910.39	7651.38	6990.97	5717.46	5085.6	5326.27	4867.88	9687.48	9042.88	6708.16	7362.85
9419	Gentianose	MS/MS | lib_lcmsms_pos | FooDB:Strawberry	NIST_1537214	[M+Na]+	MUPFEKGTMRGPLJ-WSCXOGSTSA-N	0.00315472	0.0258118	-5.27583	81.37	4813.89	4637.47	3793.94	3200.58	3308.29	3211.77	674.26	629.7	62.97	62.97	62.97	62.97	62.97	62.97	62.97	62.97	62.97	62.97	62.97	62.97
8973	Verbasoside	MS/MS | lib_lcmsms_pos | FooDB:Plant	NIST_3162987	[M+Na]+	DORPKYRPJIIARM-GYAWPQPFSA-N	0.00359052	0.801783	-0.318716	88.8	4072.57	5346.06	5763.84	5124.72	5151.1	4946.95	5079.63	4458.27	5117.62	5252.82	5614.07	4720.93	4535.51	4009	3807.81	3273.76	3296.11	2979.75	4034.04	4069.59
3005	Isobutyrylphloroglucinol	MS/MS | lib_lcmsms_pos | FooDB:Strawberry	NIST_3053451	[M+H]+	BNEBXEZRBLYBCZ-UHFFFAOYSA-N	0.00378059	0.691076	-0.533084	276.31	26512.9	26772	15912.1	15544.6	12880.6	13573.6	19627.1	19937.2	20108.9	18658.1	14490.9	13188.6	13545.7	12067.8	12947	11843	11714	11049.8	14956.4	15174.5
7323	RIBOFLAVIN	MS/MS | lib_lcmsms_pos | FooDB:Strawberry	MoNA024059	[M+H]+	AUNGANRZJHBGPY-SCRDCRAPSA-N	0.00413908	0.732649	-0.448807	262.11	29495.8	30774.4	23505.2	22968.4	18713.7	19970.4	17834.2	18240	18447.6	17960.8	20043.8	17461.1	15967.6	15109	15498.5	14605	15742	14670.7	15136.7	15417.5
2578	trans-Ferulic acid	MS/MS | lib_lcmsms_pos | FooDB:Strawberry	NIST_1356521	[M+H-H2O]+	KSEBMYQBYZTDHS-HWKANZROSA-N	0.00416909	0.75569	-0.404133	127.91	8065.01	7653.93	8721.77	8271.27	7697.58	7250.2	5362.26	5285.97	5736.26	5333.73	6498.2	6355	5666.25	5338.43	5421.79	4691.96	4041.17	4225.79	5041.44	5148.25
3993	CYTIDINE	MS/MS | lib_lcmsms_pos | FooDB:Strawberry	VF-NPL-QTOF007247	[M+H]+	UHDGCWIWMRVCDJ-XVFCMESISA-N	0.00457035	0.743963	-0.426697	210.15	5200.17	5150.15	3752.28	3526.92	3241.96	3274.69	3358.43	3138.57	3233.19	3194.78	3105.26	2928.13	2519.66	2694.83	2487.2	1997.81	3169.29	3065.61	2831.01	2780.76
2191	4-Aminoantipyrine	MS/MS | lib_lcmsms_pos | plant	NIST_1268864	[M+H-CH3NO]+	RLFWWDJHLFCNIJ-UHFFFAOYSA-N	0.00501793	0.0844728	-3.56537	47.43	2286.05	2494.49	677.27	52.678	52.678	52.678	3193.44	2594.14	3396.55	2803.26	526.78	52.678	52.678	52.678	52.678	52.678	52.678	52.678	538.79	52.678
1970	Methylisoeugenol	MS/MS | lib_lcmsms_pos | FooDB:Plant	NIST_1687442	[M+H-C2H4]+	NNWHUJCUHAELCL-SNAWJCMRSA-N	0.00505252	0.730009	-0.454014	72.12	5277.93	5065.03	3486.79	3314.84	2965.3	2876.39	3603.26	3240.08	3246.39	3347.22	3173.22	3019.36	2655.39	2211.95	2536.05	2090.84	2357.56	2533.35	3009.63	3001.93
1088	4-Hydroxyphenethyl alcohol	MS/MS | lib_lcmsms_pos | FooDB:Strawberry	NIST_1074450	[M+H-H2O]+	YCCILVSKPBXVIP-UHFFFAOYSA-N	0.00535695	2.16997	1.11768	78.29	52.425	52.425	5368.31	4766.7	4623.5	4617.17	3351.67	3263.92	3626.32	3187.21	11552	10784.7	8890.83	8470.36	8332.51	7724.36	2300.27	2036.34	5882.39	5439.2
9268	Olean-12-en-28-oic acid, 2,3,23-trihydroxy-, (4.alpha.)-	MS/MS | lib_lcmsms_pos | FooDB:Plant	NIST_3318561	[M+Na]+	RWNHLTKFBKYDOJ-UHFFFAOYSA-N	0.0053762	0.604472	-0.726252	171.72	10068.6	8562.11	12033.1	10585.4	10274	9476.04	14589.3	14536.7	9537.33	9463.27	9174.52	8283.81	8301.79	6962.34	7966.36	5901.49	117.648	117.648	9440.53	9697.51
1899	3-O-Coumaroylquinic acid	MS/MS | lib_lcmsms_pos | FooDB:Strawberry	NIST_1955999	[M+H-C7H12O6]+	BMRSEYFENKXDIS-QHAYPTCMSA-N	0.00572437	1.51475	0.599084	67.98	24151.8	23533.5	18478.1	16054.3	15328.9	14688.5	13586.2	13195.5	13776.2	13897.2	38142.4	35325.3	29016.7	27121.8	25295.8	23693.6	17621.1	17073.4	19575.3	19629.3
2239	umbelliferone	ChemDistiller | PlantCyc	PlantCyc::CPD-8186	[M+H]+	ORHBXUUXSCNDEV-UHFFFAOYSA-N	0.00665786	1.5043	0.589091	214.63	9452.42	8678.06	13696.4	11666.2	11408.5	11179.2	4952.17	4452.56	5087.05	4775.35	18129.3	16441.1	14238.1	13038.8	12728.5	11561.5	10096.5	9842.08	11181.8	11131.1
8519	Kaempferol 3-ss-D-galactoside	MS/MS | lib_lcmsms_pos | FooDB:Strawberry	NIST_3069909	[M+H]+	JPUKWEQWGBDDQB-DTGCRPNFSA-N	0.0067973	0.798667	-0.324334	232.13	5863.59	5404.3	4611.53	4123.18	3717.87	3771.19	4207.16	4010.07	4049.92	3934.27	4076.15	4246.05	3653.69	3574.31	3547.23	2906.02	2734.59	2672.45	3786.07	3699.66
7241	1-Naphthaleneacetamide	MS/MS | lib_lcmsms_pos | plant	NIST_1531750	[2M+H]+	XFNJVKMNNVCYEK-UHFFFAOYSA-N	0.00756446	1.39446	0.479705	82.86	3738.82	3736.4	2567.63	2178.2	751.11	1940.16	3045.71	2856.21	2826.77	2320.98	3848.01	3445.5	3681.78	3380.41	3722.35	3342.12	3021.63	2730.13	4637.08	4393.9
2459	DL-Indole-3-lactic acid	MS/MS | lib_lcmsms_pos | FooDB:Strawberry	NIST_1363196	[M+H-2H2O]+	XGILAAMKEQUXLS-UHFFFAOYSA-N	0.00814073	0.0738286	-3.75968	55.35	1904.21	1034.59	97.757	97.757	97.757	97.757	2256.99	2531.71	2682.68	2439.87	97.757	97.757	97.757	97.757	97.757	97.757	97.757	97.757	97.757	97.757
2682	Caffeic acid	MS/MS | lib_lcmsms_pos | FooDB:Strawberry	NIST_1350747	[M+H]+	QAIPRVGONGVQAS-DUXPYHPUSA-N	0.00818736	1.86594	0.899903	80.92	3580.48	3238.86	3829.88	3239.56	3029.94	3107.28	535.21	53.521	53.521	53.521	4284.45	3694.32	4375.73	3949.05	4873.58	4565.16	3766.74	3612.98	2742.39	2801.19
4732	Trimethoprim	MS/MS | lib_lcmsms_pos | plant	NIST_1367556	[M+H-CH4]+	IEDVJHCEMCRBQM-UHFFFAOYSA-N	0.0089601	0.925752	-0.111303	68.87	4282.04	3919.79	4138.85	3831.35	3426.44	3731.63	4165.61	3705.25	3849.21	3768.08	3461.16	3314.31	3780.01	3614.91	3833.92	3613.99	3454.83	3574.63	3503.72	3784.58
6594	2-[1-hydroxy-1-(4-methoxyphenyl)propan-2-yl]oxy-6-(hydroxymethyl)oxane-3,4,5-triol	MS/MS | lib_lcmsms_pos | plant	VF-NPL-QEHF021923	[M+H]+	JYWSARFDLXXOHT-UHFFFAOYSA-N	0.00959073	0.737787	-0.438723	67.86	6092.78	5921.08	4418.91	3904.99	3567.04	3557.86	3604.74	3208.84	3603.15	3475.99	3281.14	2875.66	3214.53	2937.95	3190.27	2833.63	2515.8	2546.56	3480.06	3635.88
4582	Adenosine	MS/MS | lib_lcmsms_pos | FooDB:Strawberry	PR100022	[M+H]+	OIRDTQYFTABQOQ-KQYNXXCUSA-N	0.0111747	0.527619	-0.922433	266.67	7332.58	7374.06	4482.73	4684.12	11336.8	11363.4	3665.57	4296.79	4649.87	3887.44	3746.92	3470.09	2962.42	2678.91	2715.08	2712.88	4603.43	4086.37	3334.89	2967.66
9600	(2R,3R,4S,5S,6R)-2-[3-[2-(4-hydroxy-3-methoxyphenyl)-3-(hydroxymethyl)-7-methoxy-2,3-dihydro-1-benzofuran-5-yl]propoxy]-6-(hydroxymethyl)oxane-3,4,5-triol	MS/MS | lib_lcmsms_pos | plant	VF-NPL-QTOF000668	[M+Na]+	DVWKMCPPEMUHBE-RAGYRXETSA-N	0.0120275	1.77088	0.824466	148.5	2836.42	2489.72	1696.12	1066.6	829.51	993.79	1865.92	601.62	585.12	506.83	2374.86	1962.31	2709.3	2271.72	2885.18	2685.75	1756.65	544.4	3330.43	3336.06
9352	1-Linoleoyl-sn-glycero-3-phosphorylcholine	MS/MS | lib_lcmsms_pos | FooDB:Strawberry	NIST_1943374	[M+H]+	SPJFYYJXNPEZDW-UTJQPWESSA-N	0.0127274	0.721794	-0.47034	1489.13	7457.26	6634.96	5166.76	4627.95	3932.93	3860.8	4641.27	4209.19	4200.71	4350.74	4547.78	4540.97	3687.29	3215.06	3147.43	2139.37	2587.52	2385.8	4603.06	4573.24
7269	[Phe2] TRH	MS/MS | lib_lcmsms_pos | plant	NIST_1632848	[M+H]+	ZETOYWKJNIJFCR-UHFFFAOYSA-N	0.0131449	0.572488	-0.804681	161.5	20280.3	20225.4	10409.9	9854.06	7644.08	7547.54	9835.64	9470.96	8416.92	7943.17	6868.33	6684.41	5937.62	5631.83	5576.63	5040.65	7495.11	7301.12	6771	6599.02
11319	Procyanidin C1	MS/MS | lib_lcmsms_pos | FooDB:Strawberry	NIST_1112151	[M+H]+	MOJZMWJRUKIQGL-CGFIDGTHSA-N	0.0133729	0.0435667	-4.52063	811.37	95.728	95.728	1134.49	1053.78	95.728	957.28	5099.02	4813.55	4926.1	3701.33	95.728	95.728	95.728	95.728	95.728	95.728	95.728	95.728	95.728	95.728
9891	(<i>Z,Z</i>)-biliverdin-IX &alpha;	ChemDistiller | PlantCyc	PlantCyc::BILIVERDINE	[M+H]+	RCNSAJSGRJSBKK-DSGIURRASA-L	0.0135405	0.619702	-0.690355	142.59	8926.66	8564.21	6581.99	3908	3562.2	4119.53	4887.73	4020.82	5429.02	3671.79	3608.55	5236.7	2911.45	2499.47	3064.22	1811.62	3456.33	2296.64	3416.96	4958.65
9867	Procyanidin B2	MS/MS | lib_lcmsms_pos | FooDB:Strawberry	NIST_1112121	[M+H]+	XFZJEEAOWLFHDH-NFJBMHMQSA-N	0.0141913	0.0645699	-3.95299	290.53	51.227	51.227	563.5	512.27	51.227	51.227	1589.84	1713.49	1776.68	1572.88	51.227	51.227	51.227	51.227	51.227	51.227	51.227	51.227	51.227	51.227
3485	Phomalone	MS/MS | lib_lcmsms_pos | plant	NIST_1958928	[M+H-2H2O]+	PTBQWWHUOMDVFS-UHFFFAOYSA-N	0.0150319	0.141569	-2.82043	70.07	1757.58	570.29	1602.75	1459.38	639.49	519.3	545.12	51.93	51.93	51.93	51.93	51.93	51.93	51.93	51.93	51.93	51.93	51.93	558.96	51.93
2506	Xylose	MS/MS | lib_lcmsms_pos | FooDB:Plant	VF-NPL-QEHF011800	[M+Na]+	PYMYPHUHKUWMLA-VPENINKCSA-N	0.0156711	4.19795	2.06968	76.83	1802.26	961.03	517.73	51.773	51.773	51.773	51.773	51.773	51.773	51.773	2975.46	2568.44	2384.25	1802.17	2672.11	2030.02	51.773	51.773	707.17	51.773
3482	Asperfuran	MS/MS | lib_lcmsms_pos | plant	NIST_3164637	[M+H]+	WTFIFQXTQCYJKU-JWVODRKRSA-N	0.0159479	0.510433	-0.970206	61.16	4808.82	4675.59	2789.02	2639.71	2209.57	1972.65	1671.26	1931.42	2051.58	1451.22	2376.35	1205.2	528.87	15.466	813.85	15.466	2418.76	1963.43	2066.05	1970.34
4312	&beta;-D-ribosylnicotinate	ChemDistiller | PlantCyc	PlantCyc::CPD-8259	[M+H]+	PUEDDPCUCPRQNY-ZYUZMQFOSA-N	0.0168532	0.926863	-0.109572	722.78	58443.3	56447.2	64941.2	58930.3	62898.1	60362.8	59295.6	54758.2	59953.9	54226.2	61155.9	56809.2	58725.3	54948.7	57260.9	54903.6	49422.7	49015.8	52558.5	52286.7
3002	Isobutyrylphloroglucinol	MS/MS | lib_lcmsms_pos | FooDB:Strawberry	NIST_3053450	[M+H]+	BNEBXEZRBLYBCZ-UHFFFAOYSA-N	0.0172911	0.835864	-0.258661	390.48	29536.2	28662.9	23637.1	21848.1	19242.4	19480.7	21533.3	21401.6	21622.7	21039.2	23759.6	20414.7	18233.1	17205.8	17953.9	15456.7	17676.8	16179.1	21804.9	21895.7
3868	<i>N</i>-Formyl-L-kynurenine	ChemDistiller | PlantCyc	PlantCyc::N-FORMYLKYNURENINE	[M+H]+	BYHJHXPTQMMKCA-QMMMGPOBSA-N	0.0173185	0.754435	-0.406532	65.47	5272.26	5163.4	3589.08	3081.31	2782.39	2520.33	3600.52	3398.07	3627.07	3402.17	3638.11	3186.16	2690.94	2376.86	2559.12	1576.51	2956.72	2883.04	2774.87	2846.71
5730	Warfarin	MS/MS | lib_lcmsms_pos | plant	EQ310304	[M+H]+	QTXVAVXCBMYBJW-UHFFFAOYSA-N	0.0194861	0.850197	-0.23413	76.59	5122.08	5234.17	4190.11	3980.16	3562.46	3791.32	3779.2	3238.61	3795.45	3690.69	4152.66	3577.85	3399.46	3156.65	3476.27	3095.4	3354.31	3195.46	3468.56	3457.96
5899	Dehydrophytosphingosine (not validated, isomer of 1679)	MS/MS | lib_lcmsms_pos | FooDB:Plant	PR310830	[M+H]+	CQKNELOTFUSOTP-UHFFFAOYSA-N	0.0196479	1.23578	0.30542	415.15	19739.4	18201.9	18491.9	16873	16187	16665	13139.1	11712.2	12175.1	11819.8	24911.1	23499.2	17893.1	17839.3	16355.2	14999.3	17125.6	16457	21282	21189.3
5640	N-(1H-Indol-3-ylacetyl)methionine	MS/MS | lib_lcmsms_pos | FooDB:Strawberry	NIST_3377725	[M+H]+	YPMYDSHISNOZST-UHFFFAOYSA-N	0.0207043	1.35735	0.44079	71.83	4275.19	4558.01	3357.14	3081.37	2804.89	2868.14	2590.12	2213.45	1823.75	1420.3	4912.94	4361.2	3628.72	3235.69	2912.94	2474.35	4618.07	4146.45	4499.2	4563.14
5372	5'-S-Methyl-5'-thioadenosine	MS/MS | lib_lcmsms_pos | FooDB:Strawberry	NIST_1348987	[M+H]+	WUUGFSXJNOTRMR-IOSLPCCCSA-N	0.0215218	1.2833	0.359858	602.39	58324.3	52891	44184.3	38978.7	32878.4	33024.9	28414.4	26290	27925.8	25095	56315.2	51372.9	46610	44730	43850.9	40095.4	46060	44947.7	49166.3	49114.7
3528	Cys-Val	MS/MS | lib_lcmsms_pos | plant	NIST_1631073	[M+H]+	OELDIVRKHTYFNG-NTSWFWBYSA-N	0.0232127	0.158292	-2.65934	97.65	3119.59	2668.33	1340.67	505.68	503.51	29.362	1741.5	636.8	573.32	29.362	518.93	536.26	29.362	29.362	29.362	29.362	29.362	29.362	503.94	29.362
8255	Pelargonidin-3-O-glucoside	MS/MS | lib_lcmsms_pos | FooDB:Strawberry	RIKENPlaSMA002675	[M]+	ABVCUBUIXWJYSE-GQUPQBGVSA-O	0.0244582	0.0720059	-3.79574	10657	7919.89	4177.79	3734.34	165.174	2693.43	165.174	2101.07	165.174	1651.74	165.174	165.174	165.174	165.174	165.174	165.174	165.174	165.174	165.174	165.174	165.174
7239	1-Naphthaleneacetamide	MS/MS | lib_lcmsms_pos | plant	NIST_1531750	[2M+H]+	XFNJVKMNNVCYEK-UHFFFAOYSA-N	0.0246584	0.616677	-0.697414	84.23	3305.52	3069.86	1994.92	1584.33	543.21	1487.47	1877.42	1948.68	2076.46	2250.84	1093.5	1570.77	1711.23	1416.11	1139.97	1036.1	525.21	52.521	2000.16	1873.5
5131	Amorfrutin 2	MS/MS | lib_lcmsms_pos | plant	NIST_3163861	[M+H-H2O]+	UJSSSFNGQWZNEN-UHFFFAOYSA-N	0.0256325	0.0801394	-3.64135	70.17	53.724	53.724	2547.74	709.22	637.01	564.6	569.02	537.24	977.82	53.724	53.724	53.724	53.724	53.724	53.724	53.724	53.724	53.724	53.724	53.724
8772	1,2,3,19-Tetrahydroxy-12-ursen-28-oic acid	MS/MS | lib_lcmsms_pos | FooDB:Plant	NIST_3161737	[M+H-2H2O]+	VULLSLYDWNGNKZ-WSUAMRMCSA-N	0.0279861	0.0612478	-4.0292	130.18	50.028	50.028	2133.53	2122.54	1374.28	1787.36	50.028	500.28	50.028	50.028	50.028	50.028	50.028	50.028	50.028	50.028	50.028	50.028	50.028	50.028
7570	Ginkgolide A	MS/MS | lib_lcmsms_pos | FooDB:Plant	NIST_1810469	[M+H-H2O]+	FPUXKXIZEIDQKW-TVPHMGRTSA-N	0.02954	0.434326	-1.20315	52.25	3462.73	2986.05	3224.34	2828.63	2522.3	2398.44	1390.41	1062.48	50.959	50.959	50.959	50.959	1630.79	50.959	2099.14	1761.3	509.59	511.42	1108.55	902.99
5979	Tyr-His	MS/MS | lib_lcmsms_pos | plant	NIST_1634694	[M+H]+	ZQOOYCZQENFIMC-STQMWFEESA-N	0.0298573	0.133643	-2.90354	235.4	1629.38	1042.68	40.647	40.647	40.647	40.647	1750.76	40.647	1410.29	885.16	40.647	40.647	40.647	40.647	559.19	40.647	40.647	40.647	40.647	40.647
6720	Enalaprilat	MS/MS | lib_lcmsms_pos | plant	CO000161	[M+H]+	LZFZMUMEGBBDTC-NWANDNLSSA-N	0.0307829	0.949305	-0.0750566	51.12	9262.93	9565.63	8625.38	8664.95	7945.13	8500.45	8586.93	8873.76	8454.33	8653.15	8433.92	7635.76	8588.47	8615.6	8805.18	7993.56	8099.71	8041.52	7858.18	8643.54
5360	Dikegulac acid	MS/MS | lib_lcmsms_pos | plant	NIST_1460241	[M+Na]+	FWCBATIDXGJRMF-FLNNQWSLSA-N	0.0313447	1.68754	0.754921	70.27	5145.26	4867.96	5135.03	4545.92	4524.46	4216.29	50.909	50.909	50.909	50.909	4857.06	4445.01	4977.31	4564.58	5019.37	4846.61	4608.33	4317.55	5332.01	5360.85
5048	Kaempferol	MS/MS | lib_lcmsms_pos | FooDB:Strawberry	RIKENPlaSMA002180	[M+H]+	IYRMWMYZSQPJKC-UHFFFAOYSA-N	0.0329063	1.25281	0.325165	349.53	24860.3	24264	18564.4	17509	16804.8	16999.8	14146.9	14666.1	15391	14948.8	28364.3	27455.7	22321	21454.2	20586.4	18670.6	15707.3	15453	27157	26024.6
4979	L-Tyrosine	MS/MS | lib_lcmsms_pos | FooDB:Strawberry	KNA00172		OUYCCCASQSFEME-QMMMGPOBSA-N	0.0344273	1.39791	0.48327	1499.51	55021	55299.1	40917.3	37454.3	32592.4	32173	16338.3	15150	15841.7	15600.8	43969.5	40513.2	41254.8	38862.9	43140.4	39431.7	49193.8	47077.8	48572.7	50264.5
10899	Gingerglycolipid A	MS/MS | lib_lcmsms_pos | FooDB:Plant	NIST_1952909	[M+Na]+	MPSGDHOYFIUPSO-MDAKJLGTSA-N	0.0350127	0.537762	-0.894961	1440.81	151820	147446	45784.6	43183.2	32005.6	32136.3	80420.5	80327.7	68148.5	63620.5	38884.1	35723.5	30841	30566.2	32729.4	30977.9	62202.1	57929.7	39481.3	41240
5167	Fonsecin	MS/MS | lib_lcmsms_pos | plant	NIST_1807554	[M+H]+	FKCYENFBFZUSDP-UHFFFAOYSA-N	0.0353964	1.93353	0.951236	67.3	2376.96	2298.57	1482.35	965.45	51.044	955.71	541.8	51.044	652.96	51.044	2891.97	2467.95	1482.81	1711.25	1675.62	1477.45	540	561.23	2799.28	2619.68
8693	NCGC00169021-02!(2S,3S,4S,5R,6S)-6-[5,7-dihydroxy-2-(4-hydroxyphenyl)-4-oxochromen-3-yl]oxy-3,4,5-trihydroxyoxane-2-carboxylic acid	MS/MS | lib_lcmsms_pos | FooDB:Strawberry	CCMSLIB00000846803	[M+H]+	FNTJVYCFNVUBOL-ZUGPOPFOSA-N	0.0356045	0.75971	-0.396479	2124.17	124501	123832	84421.7	79245.2	67996.9	68255.1	65748.6	62639.6	63126.8	63635.2	59391.4	59466.1	54787.1	53249.4	56078.3	52246	74877.5	74720.1	63640.1	61897.2
7463	N6-Succinyladenosine; AIF; CE10; MS2Dec	MS/MS | lib_lcmsms_pos | plant	MoNA018561	[M+H]+	VKGZCEJTCKHMRL-MDBUBQOGSA-N	0.0359437	0.730683	-0.452683	124.29	11916.2	11505.4	10816.1	9890.77	8099.87	8077.81	5389.4	5131	5544.56	5043.23	5474.19	4870.43	5390.12	5260.55	5901.43	5168.59	7179.25	7109.67	6602.83	6531
4243	2'-Deoxyadenosine	MS/MS | lib_lcmsms_pos | FooDB:Strawberry	NIST_1344796	[M+H]+	OLXZPDWKRNYJJZ-RRKCRQDMSA-N	0.0371113	0.204135	-2.2924	55.36	512.75	565.88	572.99	527.53	50.693	50.693	50.693	50.693	50.693	50.693	50.693	50.693	50.693	50.693	50.693	50.693	50.693	50.693	50.693	50.693
6788	NCGC00385642-01!1,4-dihydroxyheptadec-16-en-2-yl acetate [IIN-based on: CCMSLIB00000845027]	MS/MS | lib_lcmsms_pos | FooDB:Plant	CCMSLIB00005722081	[M+Na]+	LUIGTZGBXWZJAX-UHFFFAOYSA-N	0.0373189	0.0468651	-4.41534	63.96	56.53	56.53	3185.21	2970.33	2655.75	2911.82	56.53	56.53	56.53	56.53	56.53	56.53	56.53	56.53	56.53	56.53	56.53	56.53	56.53	56.53
8419	Aminopterin	MS/MS | lib_lcmsms_pos | plant	NIST_1128714	[M+H]+	TVZGACDUOSZQKY-UHFFFAOYSA-N	0.0385752	1.22324	0.290709	509.66	22341.5	21654.4	16305.1	15686.9	11982.5	12267.8	15245.2	15647.6	10817.2	9288.38	19848.1	18744.6	19492.3	18906.4	20707.7	19312.2	17033.2	17445	16264	17245.3
1662	(-)-Epigallocatechin	MS/MS | lib_lcmsms_pos | FooDB:Strawberry	NIST_1288079	[M+H-C8H8O4]+	XMOCLSLCDHWDHP-IUODEOHRSA-N	0.0392133	0.830495	-0.267956	432.38	25371.4	23525.1	18008.6	16777.4	14682.3	15199.6	16259.9	15407.6	15745.4	14364.8	16430.5	15687.3	14517.3	12733.8	14151.8	12639.8	15237.5	13937.1	15449.9	14835.9
9285	1-Alaninechlamydocin_130134	MS/MS | lib_lcmsms_pos | plant	CCMSLIB00000478539	[M+H]+	QMNUPNOLDLHVTB-IWDBHXEASA-N	0.0394103	0.794505	-0.331871	94.4	4904.72	4534.84	5209.19	4718.33	4603.36	4213.11	3276.3	3038.65	2951.29	2649.01	4360.1	4297.1	2958.32	2821.18	2589.46	2086.54	3200.51	3195.91	3205.61	3143.98
6856	1-Monolinolenin	MS/MS | lib_lcmsms_pos | FooDB:Strawberry	NIST_3173290	[M+H]+	GGJRAQULURVTAJ-PDBXOOCHSA-N	0.0398726	0.765065	-0.386345	127.97	17272.1	16726.9	11920.5	10287.1	9372.95	9612.2	9324.14	8687.96	8821.65	8171.78	10359.2	10435	8418.67	7964.72	7303.47	6973.23	9114.29	8303.59	7436.5	7999.46
10053	4'-hydroxyadonixanthin	ChemDistiller | PlantCyc	PlantCyc::CPD-20426	[M+H]+	DNKQGUYVWUAYIE-YNMKFKMASA-N	0.0414116	1.36248	0.446233	2205.51	67017.3	61754.4	203242	183657	198006	184252	276703	264332	284658	277432	323502	305972	358039	335214	241282	229525	182719	170932	289639	289568
1286	1,3,5-Benzenetriol	MS/MS | lib_lcmsms_pos | FooDB:Strawberry	NIST_1627112	[M+H]+	QCDYQQDYXPDABM-UHFFFAOYSA-N	0.0424258	1.32029	0.400852	9.65	5298.78	5191.9	3039.94	2723.3	1978.77	1536.42	3123.53	3120.6	3411.49	2608.43	5087.84	4495.25	3693.13	3633.08	3660.24	3333.01	4071.65	3479.35	5707.86	5131.58
11138	1-(1Z-Octadecenyl)-2-(9Z-octadecenoyl)-sn-glycero-3-phosphocholine	MS/MS | lib_lcmsms_pos | plant	NIST_1197280	[M+H]+	DSWOVBIRJNAJAF-NVJOKYTBSA-N	0.0444538	0.0360767	-4.79279	58.68	52.477	52.477	52.477	52.477	2696.5	2696.49	52.477	52.477	4525.97	4312.14	52.477	52.477	52.477	52.477	52.477	52.477	52.477	52.477	52.477	52.477
1129	(-)-Catechin	MS/MS | lib_lcmsms_pos | FooDB:Strawberry	NIST_1310316	[M+H-C8H8O4]+	PFTAWBLQPZVEMU-HIFRSBDPSA-N	0.0461352	1.36658	0.450572	158.68	4359.31	3855.86	4838.21	4510.66	4223.49	4016.89	5114.3	4681.43	4911.73	4628.85	7482.72	7462.55	7821.45	7546.57	8475.5	7947.2	2495.69	2663.91	5006.89	4786.02
4499	Met-Asn	MS/MS | lib_lcmsms_pos | plant	NIST_1642115	[M+H]+	JMEWFDUAFKVAAT-RITPCOANSA-N	0.0470356	0.116901	-3.09665	159.44	13329.1	13003.1	4217.46	4027.14	2898.24	2401.05	839.38	556.74	50.675	50.675	638.53	50.675	50.675	50.675	50.675	50.675	2501.23	1342.1	50.675	50.675
9144	1843U89	ChemDistiller | PlantCyc	PlantCyc::CPD-12510	[M+H]+	BRVFNEZMTRVUGW-QFIPXVFZSA-L	0.0471364	1.38142	0.466156	111.56	2723.95	2816.97	5850.52	5818.58	5281.33	5586.62	3101.8	2911.31	2768.89	2614.3	7249.34	6705.13	6298.53	6169.74	6879.91	6551.37	2734.91	2756.21	4793.75	4391.81
1855	5-Hydroxyindole-3-acetic acid	MS/MS | lib_lcmsms_pos | FooDB:Strawberry	NIST_1347758	[M+H-CH2O2]+	DUUGKQCEGZLZNO-UHFFFAOYSA-N	0.0486747	0.740889	-0.43267	1384.3	3640.38	3591.93	3185.58	2823.81	2318.99	2199.3	2719.9	2029.82	2810.03	2534.63	2935.63	2135.23	2105.4	1996.4	2472.2	2267.07	983.43	60.559	2673.03	3008.06
1607	Isopentenyladenine	MS/MS | lib_lcmsms_pos | FooDB:Strawberry	NIST_1370113	[M+H-C5H8]+	HYVABZIGRDEKCD-UHFFFAOYSA-N	0.0499773	1.20174	0.265127	125.72	20978.1	20828.2	15171.8	15356.1	12842.7	13217.8	11519.9	11198.7	10869.7	10278.1	19673	18296.3	16962.6	16536.4	16804.7	14817.2	16485.6	16228	17526.4	17631
